# Supplementary material for: Loss of Active Neurogenesis in the Adult Shark Retina
Source: Front Cell Dev Biol. 2021 Feb 11;9:628721. doi: 10.3389/fcell.2021.628721 (PMC7905061; doi:10.3389/fcell.2021.628721)
Supplement: Supplementary Material 1 — Differentially expressed genes between juvenile and adult retinas. A positive fold change indicates a decreased expression in the adult retina. [file Data_Sheet_1.xlsx]

## Sheet: Significant
ID	Gene expression	log2FoldChange (positive = more expressed in juvenile)	padj	Annotation
Cluster-3.11386	625.168	3.26616	4.21e-73
Cluster-3.7928	5170.62	2.11154	1.86e-67
Cluster-4110.3	668.509	2.33417	1.21e-45	sp_P04198_MYCN_HUMAN_N-myc_proto-oncogene_protein_OS=Homo_sapiens_OX=9606_GN=MYCN_PE=1_SV=2
Cluster-12396.0	2744.66	-1.66433	1.46e-39	sp_Q9Y6F1_PARP3_HUMAN_Poly_[ADP-ribose]_polymerase_3_OS=Homo_sapiens_OX=9606_GN=PARP3_PE=1_SV=4
Cluster-1353.0	384.364	-2.10203	7.21e-39	sp_A2BGS3_TM116_DANRE_Transmembrane_protein_116_OS=Danio_rerio_OX=7955_GN=tmem116_PE=2_SV=1
Cluster-9163.0	4289.37	3.04959	1.14e-38	sp_A4IIN5_TISD_XENTR_mRNA_decay_activator_protein_ZFP36L2_OS=Xenopus_tropicalis_OX=8364_GN=zfp36l2_PE=2_SV=2
Cluster-3.4988	1627.09	2.07537	1.53e-38	sp_Q91981_OTX2_DANRE_Homeobox_protein_OTX2_OS=Danio_rerio_OX=7955_GN=otx2_PE=2_SV=1
Cluster-6353.0	260.248	4.40337	2.68e-37	sp_E7EZF3_UHRF1_DANRE_E3_ubiquitin-protein_ligase_UHRF1_OS=Danio_rerio_OX=7955_GN=uhrf1_PE=1_SV=1
Cluster-3.5981	191.746	3.13687	7.42e-36	sp_Q2TAW0_CNDG2_XENLA_Condensin-2_complex_subunit_G2_OS=Xenopus_laevis_OX=8355_GN=ncapg2_PE=1_SV=1
Cluster-4013.0	118.439	4.04988	2.46e-35	sp_Q8WVM7_STAG1_HUMAN_Cohesin_subunit_SA-1_OS=Homo_sapiens_OX=9606_GN=STAG1_PE=1_SV=3
Cluster-10686.0	176.935	2.88389	6.16e-35	sp_O00370_LORF2_HUMAN_LINE-1_retrotransposable_element_ORF2_protein_OS=Homo_sapiens_OX=9606_PE=1_SV=1
Cluster-3.5969	145.753	3.73461	1.57e-34
Cluster-1308.0	466.583	2.35859	1.99e-34
Cluster-3.1107	356.423	-1.79506	6.46e-34	sp_Q8K419_LEG4_MOUSE_Galectin-4_OS=Mus_musculus_OX=10090_GN=Lgals4_PE=1_SV=2
Cluster-3.10353	2223.85	2.16596	6.15e-32
Cluster-3.12249	1696.59	1.2804	8.2e-32	sp_Q3USH5_SFSWA_MOUSE_Splicing_factor,_suppressor_of_white-apricot_homolog_OS=Mus_musculus_OX=10090_GN=Sfswap_PE=1_SV=2
Cluster-3.11911	18853.5	-1.95453	1.11e-31	sp_Q8BXJ2_TREF1_MOUSE_Transcriptional-regulating_factor_1_OS=Mus_musculus_OX=10090_GN=Trerf1_PE=1_SV=1
Cluster-1591.0	206.899	-2.81989	1.44e-31
Cluster-467.0	332.395	2.98339	5.94e-30	sp_Q71QF9_PRIC1_RAT_Prickle-like_protein_1_OS=Rattus_norvegicus_OX=10116_GN=Prickle1_PE=2_SV=2
Cluster-12892.0	924.833	2.81238	1.91e-29	sp_A4L7N3_FOXO1_PIG_Forkhead_box_protein_O1_OS=Sus_scrofa_OX=9823_GN=FOXO1_PE=2_SV=1
Cluster-3.9920	376.059	1.70493	4.11e-29
Cluster-11369.1	1721.17	-2.24948	2.05e-28	sp_Q13410_BT1A1_HUMAN_Butyrophilin_subfamily_1_member_A1_OS=Homo_sapiens_OX=9606_GN=BTN1A1_PE=1_SV=3
Cluster-11974.0	380.373	-1.78446	2.05e-28	sp_Q7TSQ1_CL18A_MOUSE_C-type_lectin_domain_family_18_member_A_OS=Mus_musculus_OX=10090_GN=Clec18a_PE=2_SV=1
Cluster-15545.0	358.444	3.58087	2.2e-28	sp_Q2KHT6_FBX32_BOVIN_F-box_only_protein_32_OS=Bos_taurus_OX=9913_GN=FBXO32_PE=2_SV=1
Cluster-15763.0	3382.62	2.01237	1.38e-27	sp_Q00709_BCL2_CHICK_Apoptosis_regulator_Bcl-2_OS=Gallus_gallus_OX=9031_GN=BCL2_PE=2_SV=1
Cluster-3.1377	1098.62	-1.86864	1.41e-27	sp_P18293_ANPRA_MOUSE_Atrial_natriuretic_peptide_receptor_1_OS=Mus_musculus_OX=10090_GN=Npr1_PE=1_SV=2
Cluster-6926.0	125.288	4.5506	1.41e-27
Cluster-5154.0	181.634	-3.83108	2.91e-27	sp_Q16674_MIA_HUMAN_Melanoma-derived_growth_regulatory_protein_OS=Homo_sapiens_OX=9606_GN=MIA_PE=1_SV=1
Cluster-3.330	709.439	-3.88796	3.21e-27	sp_Q86VP1_TAXB1_HUMAN_Tax1-binding_protein_1_OS=Homo_sapiens_OX=9606_GN=TAX1BP1_PE=1_SV=2
Cluster-3.6300	68.5326	2.73848	3.21e-27
Cluster-8527.1	758.014	-1.70944	8.13e-27	sp_F1N152_HTRA1_BOVIN_Serine_protease_HTRA1_OS=Bos_taurus_OX=9913_GN=HTRA1_PE=2_SV=1
Cluster-5781.0	124.654	2.75764	1.25e-26
Cluster-3.3245	11864.7	-3.72772	2.16e-26	sp_O00204_ST2B1_HUMAN_Sulfotransferase_family_cytosolic_2B_member_1_OS=Homo_sapiens_OX=9606_GN=SULT2B1_PE=1_SV=2
Cluster-3106.0	1239.14	-4.3165	3.35e-26
Cluster-3.2159	149.587	2.19698	5.05e-26	sp_O13067_CND2_XENLA_Condensin_complex_subunit_2_OS=Xenopus_laevis_OX=8355_GN=ncaph_PE=1_SV=1
Cluster-3.5035	436.21	-2.87591	8.23e-26	sp_Q1WK23_PRS23_MACMU_Serine_protease_23_OS=Macaca_mulatta_OX=9544_GN=PRSS23_PE=2_SV=1
Cluster-2506.0	752.513	-2.37545	9.9e-26	sp_Q8MIP0_FRIH_HORSE_Ferritin_heavy_chain_OS=Equus_caballus_OX=9796_GN=FTH1_PE=2_SV=3
Cluster-10286.0	1368.29	2.66629	1.03e-25	sp_Q9NSC2_SALL1_HUMAN_Sal-like_protein_1_OS=Homo_sapiens_OX=9606_GN=SALL1_PE=1_SV=2
Cluster-2509.0	552.203	1.19208	2.29e-25	sp_P84770_IRS1B_XENLA_Insulin_receptor_substrate_1-B_OS=Xenopus_laevis_OX=8355_GN=irs1-b_PE=2_SV=1
Cluster-3.3875	12044.1	-1.75637	2.6e-25	sp_Q5R5A0_ANXA2_PONAB_Annexin_A2_OS=Pongo_abelii_OX=9601_GN=ANXA2_PE=2_SV=1
Cluster-3.1553	4596.15	-1.04907	3.56e-25	sp_P97379_G3BP2_MOUSE_Ras_GTPase-activating_protein-binding_protein_2_OS=Mus_musculus_OX=10090_GN=G3bp2_PE=1_SV=2
Cluster-3.11655	1634.65	2.23936	3.67e-25
Cluster-12136.2	598.125	2.91731	3.71e-25	sp_Q66JF1_SOX11_XENTR_Transcription_factor_Sox-11_OS=Xenopus_tropicalis_OX=8364_GN=sox11_PE=2_SV=1
Cluster-3.7083	420.736	-1.56258	4.12e-25
Cluster-4559.0	188.214	2.45588	1.02e-24
Cluster-3305.0	694.612	-3.67032	1.15e-24	sp_P09668_CATH_HUMAN_Pro-cathepsin_H_OS=Homo_sapiens_OX=9606_GN=CTSH_PE=1_SV=4
Cluster-3.11393	4426.75	-5.23003	1.15e-24	sp_P04271_S100B_HUMAN_Protein_S100-B_OS=Homo_sapiens_OX=9606_GN=S100B_PE=1_SV=2
Cluster-14242.0	193.795	2.96262	2.29e-24	sp_Q9P2W3_GBG13_HUMAN_Guanine_nucleotide-binding_protein_G(I)/G(S)/G(O)_subunit_gamma-13_OS=Homo_sapiens_OX=9606_GN=GNG13_PE=1_SV=1
Cluster-16099.0	3401.41	-1.35712	2.29e-24	sp_Q5BKX6_S45A4_HUMAN_Solute_carrier_family_45_member_4_OS=Homo_sapiens_OX=9606_GN=SLC45A4_PE=1_SV=2
Cluster-11381.0	655.413	-3.60292	3.54e-24	sp_P08575_PTPRC_HUMAN_Receptor-type_tyrosine-protein_phosphatase_C_OS=Homo_sapiens_OX=9606_GN=PTPRC_PE=1_SV=3
Cluster-13264.0	98.0822	4.54748	5.32e-24	sp_P39963_CCNB3_CHICK_G2/mitotic-specific_cyclin-B3_OS=Gallus_gallus_OX=9031_GN=CCNB3_PE=2_SV=1
Cluster-15406.0	269.166	-3.18166	8.95e-24	sp_Q5EA79_GALM_BOVIN_Aldose_1-epimerase_OS=Bos_taurus_OX=9913_GN=GALM_PE=2_SV=1
Cluster-669.0	1700.72	-2.63506	9.46e-24	sp_Q28178_TSP1_BOVIN_Thrombospondin-1_OS=Bos_taurus_OX=9913_GN=THBS1_PE=2_SV=2
Cluster-3.3077	1233.22	2.18169	1.73e-23
Cluster-3.5409	117.616	-3.21647	3.17e-23	sp_Q9UN76_S6A14_HUMAN_Sodium-_and_chloride-dependent_neutral_and_basic_amino_acid_transporter_B(0+)_OS=Homo_sapiens_OX=9606_GN=SLC6A14_PE=2_SV=1
Cluster-14741.0	138.239	-2.35988	3.22e-23
Cluster-8384.0	823.131	-1.43377	4.05e-23	sp_Q99PL5_RRBP1_MOUSE_Ribosome-binding_protein_1_OS=Mus_musculus_OX=10090_GN=Rrbp1_PE=1_SV=2
Cluster-3231.0	139.089	-2.43425	4.94e-23	sp_Q5F362_CC50A_CHICK_Cell_cycle_control_protein_50A_OS=Gallus_gallus_OX=9031_GN=TMEM30A_PE=2_SV=1
Cluster-3.13292	123.791	4.84542	5.82e-23
Cluster-1201.0	1615.83	-1.16413	6.55e-23	sp_Q6RI88_S4A5_RAT_Electrogenic_sodium_bicarbonate_cotransporter_4_OS=Rattus_norvegicus_OX=10116_GN=Slc4a5_PE=1_SV=1
Cluster-978.0	2046.09	-2.25433	6.92e-23	sp_Q7Z304_MAMC2_HUMAN_MAM_domain-containing_protein_2_OS=Homo_sapiens_OX=9606_GN=MAMDC2_PE=2_SV=3
Cluster-9719.0	124594	-4.28413	8.29e-23	sp_Q6AZY7_SCAR3_HUMAN_Scavenger_receptor_class_A_member_3_OS=Homo_sapiens_OX=9606_GN=SCARA3_PE=1_SV=1
Cluster-3.3214	439.539	3.15952	9.52e-23
Cluster-6783.0	462.755	-2.45861	1.15e-22	sp_P48034_AOXA_BOVIN_Aldehyde_oxidase_1_OS=Bos_taurus_OX=9913_GN=AOX1_PE=1_SV=2
Cluster-6497.0	90.1541	-5.5497	1.98e-22	sp_Q32LK9_SYCE1_BOVIN_Synaptonemal_complex_central_element_protein_1_OS=Bos_taurus_OX=9913_GN=SYCE1_PE=2_SV=2
Cluster-3.5524	2134.43	-3.90081	3.03e-22	sp_Q9D361_SNR48_MOUSE_U11/U12_small_nuclear_ribonucleoprotein_48_kDa_protein_OS=Mus_musculus_OX=10090_GN=Snrnp48_PE=2_SV=2
Cluster-2469.0	173.493	2.12371	4.2e-22
Cluster-3.10834	496.147	2.87455	4.2e-22
Cluster-16563.0	4390.36	-2.23739	4.65e-22	sp_Q9W6B4_TIMP3_SCYTO_Metalloproteinase_inhibitor_3_OS=Scyliorhinus_torazame_OX=75743_GN=TIMP3_PE=2_SV=1
Cluster-2727.0	55.2791	-3.34388	5.58e-22	sp_Q4R4P4_FA2H_MACFA_Fatty_acid_2-hydroxylase_OS=Macaca_fascicularis_OX=9541_GN=FA2H_PE=2_SV=1
Cluster-7279.0	251.919	-2.47962	6.9e-22	sp_Q9BGL2_LRAT_BOVIN_Lecithin_retinol_acyltransferase_OS=Bos_taurus_OX=9913_GN=LRAT_PE=1_SV=1
Cluster-14795.1	286.511	-2.88344	1.02e-21
Cluster-3.4468	2053.79	-1.26677	1.87e-21	sp_Q99P31_HPBP1_MOUSE_Hsp70-binding_protein_1_OS=Mus_musculus_OX=10090_GN=Hspbp1_PE=1_SV=1
Cluster-11075.2	687.37	-4.1179	1.92e-21	sp_Q32L50_SBSPO_BOVIN_Somatomedin-B_and_thrombospondin_type-1_domain-containing_protein_OS=Bos_taurus_OX=9913_GN=SBSPON_PE=2_SV=2
Cluster-10581.0	165.366	1.89527	2.78e-21	sp_P58873_RHBL3_MOUSE_Rhomboid-related_protein_3_OS=Mus_musculus_OX=10090_GN=Rhbdl3_PE=2_SV=1
Cluster-7611.0	107.395	2.12316	3.08e-21
Cluster-3335.0	1309.13	-1.5664	3.21e-21	sp_Q63772_GAS6_RAT_Growth_arrest-specific_protein_6_OS=Rattus_norvegicus_OX=10116_GN=Gas6_PE=1_SV=1
Cluster-3.11794	504.367	1.82422	3.24e-21	sp_Q5RJI4_PKDCC_MOUSE_Extracellular_tyrosine-protein_kinase_PKDCC_OS=Mus_musculus_OX=10090_GN=Pkdcc_PE=1_SV=2
Cluster-6123.0	685.955	2.10098	3.46e-21
Cluster-3.7831	427.115	1.1661	4.22e-21	sp_Q8IZ26_ZNF34_HUMAN_Zinc_finger_protein_34_OS=Homo_sapiens_OX=9606_GN=ZNF34_PE=1_SV=3
Cluster-16051.1	106.937	-3.75057	4.56e-21	sp_P53816_PA216_HUMAN_HRAS-like_suppressor_3_OS=Homo_sapiens_OX=9606_GN=PLA2G16_PE=1_SV=2
Cluster-3275.0	120.352	-2.38874	4.56e-21	sp_Q13133_NR1H3_HUMAN_Oxysterols_receptor_LXR-alpha_OS=Homo_sapiens_OX=9606_GN=NR1H3_PE=1_SV=2
Cluster-1497.1	112.87	3.70177	6.45e-21	sp_Q6DE08_AUKBA_XENLA_Aurora_kinase_B-A_OS=Xenopus_laevis_OX=8355_GN=aurkb-a_PE=1_SV=1
Cluster-14983.0	1402.27	-3.45271	6.79e-21	sp_O18993_CP3AL_CALJA_Cytochrome_P450_3A21_OS=Callithrix_jacchus_OX=9483_GN=CYP3A21_PE=2_SV=1
Cluster-3729.0	575.994	1.7892	8.94e-21
Cluster-419.0	137.362	3.48743	9.96e-21	sp_Q07832_PLK1_MOUSE_Serine/threonine-protein_kinase_PLK1_OS=Mus_musculus_OX=10090_GN=Plk1_PE=1_SV=2
Cluster-14937.0	70.2214	-1.96521	1.01e-20	sp_Q9JK15_ADAP2_RAT_Arf-GAP_with_dual_PH_domain-containing_protein_2_OS=Rattus_norvegicus_OX=10116_GN=Adap2_PE=1_SV=1
Cluster-16670.0	787.203	-4.1235	1.27e-20	sp_P14106_C1QB_MOUSE_Complement_C1q_subcomponent_subunit_B_OS=Mus_musculus_OX=10090_GN=C1qb_PE=1_SV=2
Cluster-14086.0	90.735	3.34979	1.29e-20	sp_O60566_BUB1B_HUMAN_Mitotic_checkpoint_serine/threonine-protein_kinase_BUB1_beta_OS=Homo_sapiens_OX=9606_GN=BUB1B_PE=1_SV=3
Cluster-13430.0	1898.29	-2.46538	1.73e-20	sp_P47875_CSRP1_RAT_Cysteine_and_glycine-rich_protein_1_OS=Rattus_norvegicus_OX=10116_GN=Csrp1_PE=1_SV=2
Cluster-7860.0	1036.61	-2.22967	3.24e-20	sp_Q9ET38_CLD19_MOUSE_Claudin-19_OS=Mus_musculus_OX=10090_GN=Cldn19_PE=1_SV=3
Cluster-7511.0	611.969	-2.72487	4.59e-20	sp_Q91WT8_RBM47_MOUSE_RNA-binding_protein_47_OS=Mus_musculus_OX=10090_GN=Rbm47_PE=1_SV=1
Cluster-5915.0	279.57	2.21432	8.21e-20	sp_Q91876_MCM7A_XENLA_DNA_replication_licensing_factor_mcm7-A_OS=Xenopus_laevis_OX=8355_GN=mcm7-a_PE=1_SV=2
Cluster-3.11570	526.216	2.47443	8.74e-20	sp_Q2KJC9_AL7A1_BOVIN_Alpha-aminoadipic_semialdehyde_dehydrogenase_OS=Bos_taurus_OX=9913_GN=ALDH7A1_PE=2_SV=4
Cluster-3.11744	116.884	2.95026	1.01e-19	sp_Q8IZC4_RTKN2_HUMAN_Rhotekin-2_OS=Homo_sapiens_OX=9606_GN=RTKN2_PE=2_SV=1
Cluster-14752.0	160.029	2.1017	1.6e-19
Cluster-6292.0	492.811	-2.4627	1.97e-19	sp_Q90839_DKK3_CHICK_Dickkopf-related_protein_3_OS=Gallus_gallus_OX=9031_GN=DKK3_PE=2_SV=1
Cluster-1532.0	205.179	-2.9872	2.02e-19	sp_Q5ZKB7_AT134_CHICK_Probable_cation-transporting_ATPase_13A4_OS=Gallus_gallus_OX=9031_GN=ATP13A4_PE=2_SV=1
Cluster-3.2128	4409.26	-1.81816	2.09e-19	sp_Q9Y6N7_ROBO1_HUMAN_Roundabout_homolog_1_OS=Homo_sapiens_OX=9606_GN=ROBO1_PE=1_SV=1
Cluster-14258.1	1464.57	1.10594	2.25e-19	sp_Q8IY22_CMIP_HUMAN_C-Maf-inducing_protein_OS=Homo_sapiens_OX=9606_GN=CMIP_PE=1_SV=3
Cluster-4238.1	277.199	2.75799	2.27e-19	sp_Q14112_NID2_HUMAN_Nidogen-2_OS=Homo_sapiens_OX=9606_GN=NID2_PE=1_SV=3
Cluster-12232.0	378.375	-2.46625	2.41e-19
Cluster-4209.0	1387.38	1.34133	3.36e-19	sp_Q6DIN3_MBTD1_XENTR_MBT_domain-containing_protein_1_OS=Xenopus_tropicalis_OX=8364_GN=mbtd1_PE=2_SV=1
Cluster-9803.0	248.732	-2.27438	3.36e-19	sp_A2TJ54_CLN5_SHEEP_Ceroid-lipofuscinosis_neuronal_protein_5_OS=Ovis_aries_OX=9940_GN=CLN5_PE=2_SV=1
Cluster-16622.4	166.162	1.41941	3.88e-19
Cluster-6860.0	457.107	-4.08636	4.36e-19	sp_O35568_FBLN3_RAT_EGF-containing_fibulin-like_extracellular_matrix_protein_1_OS=Rattus_norvegicus_OX=10116_GN=Efemp1_PE=1_SV=1
Cluster-13406.0	276.276	-2.0942	4.62e-19	sp_P37172_ACVR1_MOUSE_Activin_receptor_type-1_OS=Mus_musculus_OX=10090_GN=Acvr1_PE=2_SV=2
Cluster-5012.0	469.322	1.95688	4.62e-19
Cluster-3.8133	1519.5	1.19142	4.89e-19	sp_Q9NYB0_TE2IP_HUMAN_Telomeric_repeat-binding_factor_2-interacting_protein_1_OS=Homo_sapiens_OX=9606_GN=TERF2IP_PE=1_SV=1
Cluster-3.890	433.505	-3.49924	5.03e-19	sp_O15072_ATS3_HUMAN_A_disintegrin_and_metalloproteinase_with_thrombospondin_motifs_3_OS=Homo_sapiens_OX=9606_GN=ADAMTS3_PE=2_SV=4
Cluster-3.11858	27218.2	-1.75275	6.25e-19	sp_Q9BXW6_OSBL1_HUMAN_Oxysterol-binding_protein-related_protein_1_OS=Homo_sapiens_OX=9606_GN=OSBPL1A_PE=1_SV=2
Cluster-3730.0	231.248	-1.41934	6.59e-19	sp_Q8AVU4_HES1B_XENLA_Transcription_factor_HES-1-B_OS=Xenopus_laevis_OX=8355_GN=hes1-b_PE=2_SV=1
Cluster-3030.0	91.8423	-2.02065	7.64e-19
Cluster-3.1818	441.272	-3.41327	8.07e-19
Cluster-3.12366	396.284	1.32136	1.1e-18
Cluster-14983.3	1612.8	-2.73874	1.16e-18	sp_O18993_CP3AL_CALJA_Cytochrome_P450_3A21_OS=Callithrix_jacchus_OX=9483_GN=CYP3A21_PE=2_SV=1
Cluster-3.2656	59.8236	-5.39739	1.16e-18	sp_Q3T112_PSB8_BOVIN_Proteasome_subunit_beta_type-8_OS=Bos_taurus_OX=9913_GN=PSMB8_PE=1_SV=2
Cluster-14983.1	2581.52	-3.24204	1.21e-18	sp_O18993_CP3AL_CALJA_Cytochrome_P450_3A21_OS=Callithrix_jacchus_OX=9483_GN=CYP3A21_PE=2_SV=1
Cluster-915.0	148.147	1.88099	1.29e-18	sp_Q6P4F7_RHGBA_HUMAN_Rho_GTPase-activating_protein_11A_OS=Homo_sapiens_OX=9606_GN=ARHGAP11A_PE=1_SV=2
Cluster-13395.0	3380.91	-3.70071	1.37e-18	sp_Q8TAM6_ERMIN_HUMAN_Ermin_OS=Homo_sapiens_OX=9606_GN=ERMN_PE=2_SV=1
Cluster-6180.0	474.284	-4.25548	1.39e-18	sp_Q5RC36_S10A1_PONAB_Protein_S100-A1_OS=Pongo_abelii_OX=9601_GN=S100A1_PE=3_SV=3
Cluster-16432.1	406.438	2.49658	2.05e-18
Cluster-3.10847	21961.7	-2.15038	3.02e-18	sp_P26779_SAP_BOVIN_Prosaposin_OS=Bos_taurus_OX=9913_GN=PSAP_PE=1_SV=3
Cluster-3.5093	85.9363	2.09685	4.05e-18
Cluster-3.6652	3045.48	-1.56216	4.07e-18	sp_O95864_FADS2_HUMAN_Fatty_acid_desaturase_2_OS=Homo_sapiens_OX=9606_GN=FADS2_PE=1_SV=1
Cluster-3.6456	163.131	1.79293	4.37e-18	sp_Q9D4P0_ARL5B_MOUSE_ADP-ribosylation_factor-like_protein_5B_OS=Mus_musculus_OX=10090_GN=Arl5b_PE=2_SV=3
Cluster-3.5320	4842.71	2.51405	4.44e-18
Cluster-8819.0	1892.1	-1.10055	5.43e-18	sp_Q68CZ2_TENS3_HUMAN_Tensin-3_OS=Homo_sapiens_OX=9606_GN=TNS3_PE=1_SV=2
Cluster-3.2377	1611.13	-1.50942	5.88e-18	sp_Q9UI14_PRAF1_HUMAN_Prenylated_Rab_acceptor_protein_1_OS=Homo_sapiens_OX=9606_GN=RABAC1_PE=1_SV=1
Cluster-2056.0	986.461	-3.09903	7.58e-18	sp_Q92765_SFRP3_HUMAN_Secreted_frizzled-related_protein_3_OS=Homo_sapiens_OX=9606_GN=FRZB_PE=1_SV=2
Cluster-3.4199	121.608	2.23215	7.89e-18
Cluster-6628.0	3874.21	-2.73837	7.9e-18	sp_Q13510_ASAH1_HUMAN_Acid_ceramidase_OS=Homo_sapiens_OX=9606_GN=ASAH1_PE=1_SV=5
Cluster-11586.0	361.038	2.51427	8.17e-18	sp_Q6TFL4_KLH24_HUMAN_Kelch-like_protein_24_OS=Homo_sapiens_OX=9606_GN=KLHL24_PE=1_SV=1
Cluster-7585.0	1396.78	-1.47516	8.17e-18	sp_B4F6I5_FICD_XENTR_Adenosine_monophosphate-protein_transferase_FICD_OS=Xenopus_tropicalis_OX=8364_GN=ficd_PE=2_SV=1
Cluster-14656.0	118.318	3.96266	8.66e-18	sp_Q9NRZ9_HELLS_HUMAN_Lymphoid-specific_helicase_OS=Homo_sapiens_OX=9606_GN=HELLS_PE=1_SV=1
Cluster-13727.0	634.27	-1.94447	9.46e-18	sp_Q96HJ3_CCD34_HUMAN_Coiled-coil_domain-containing_protein_34_OS=Homo_sapiens_OX=9606_GN=CCDC34_PE=1_SV=2
Cluster-16273.0	656.943	2.02188	1.02e-17	sp_O94988_FA13A_HUMAN_Protein_FAM13A_OS=Homo_sapiens_OX=9606_GN=FAM13A_PE=1_SV=2
Cluster-4661.0	416.464	-3.14905	1.18e-17	sp_Q6UWV6_ENPP7_HUMAN_Ectonucleotide_pyrophosphatase/phosphodiesterase_family_member_7_OS=Homo_sapiens_OX=9606_GN=ENPP7_PE=1_SV=3
Cluster-10209.0	149.038	-1.81732	1.24e-17	sp_Q56A36_HSH2D_DANRE_Hematopoietic_SH2_domain-containing_protein_homolog_OS=Danio_rerio_OX=7955_GN=hsh2d_PE=2_SV=1
Cluster-3.6457	171.258	2.04092	1.31e-17
Cluster-3.11400	8964.07	-1.83927	1.48e-17	sp_F1N152_HTRA1_BOVIN_Serine_protease_HTRA1_OS=Bos_taurus_OX=9913_GN=HTRA1_PE=2_SV=1
Cluster-9328.0	1451.98	-2.87598	1.6e-17	sp_Q9GZN8_CT027_HUMAN_UPF0687_protein_C20orf27_OS=Homo_sapiens_OX=9606_GN=C20orf27_PE=1_SV=3
Cluster-12542.0	106.193	-3.65073	1.83e-17	sp_Q5ZMB2_HEBP1_CHICK_Heme-binding_protein_1_OS=Gallus_gallus_OX=9031_GN=HEBP1_PE=2_SV=1
Cluster-3.9536	712.262	-2.49534	1.85e-17	sp_A2BD05_NEK6_PIG_Serine/threonine-protein_kinase_Nek6_OS=Sus_scrofa_OX=9823_GN=NEK6_PE=3_SV=1
Cluster-3.8986	656.472	-1.36211	1.99e-17	sp_Q5R5U3_ZN271_PONAB_Zinc_finger_protein_271_OS=Pongo_abelii_OX=9601_GN=ZNF271_PE=2_SV=1
Cluster-3.12236	241.185	1.80706	2.11e-17	sp_P59281_RHG39_MOUSE_Rho_GTPase-activating_protein_39_OS=Mus_musculus_OX=10090_GN=Arhgap39_PE=1_SV=2
Cluster-15448.0	246.278	-2.48171	2.18e-17	sp_Q923V4_FBX6_RAT_F-box_only_protein_6_OS=Rattus_norvegicus_OX=10116_GN=Fbxo6_PE=1_SV=1
Cluster-7022.0	486.665	-1.441	2.18e-17	sp_Q92484_ASM3A_HUMAN_Acid_sphingomyelinase-like_phosphodiesterase_3a_OS=Homo_sapiens_OX=9606_GN=SMPDL3A_PE=1_SV=2
Cluster-3.518	61.8882	-4.30416	2.84e-17	sp_E9Q9A9_OAS2_MOUSE_2'-5'-oligoadenylate_synthase_2_OS=Mus_musculus_OX=10090_GN=Oas2_PE=1_SV=1
Cluster-3.6214	8663.54	-3.197	2.86e-17	sp_A5GFW7_RTF2_PIG_Protein_RTF2_homolog_OS=Sus_scrofa_OX=9823_GN=RTFDC1_PE=3_SV=1
Cluster-927.0	185.538	-3.63023	2.92e-17	sp_P35171_CX7A2_RAT_Cytochrome_c_oxidase_subunit_7A2,_mitochondrial_OS=Rattus_norvegicus_OX=10116_GN=Cox7a2_PE=1_SV=1
Cluster-2705.0	339.549	2.3476	2.93e-17
Cluster-3.12928	3560.43	1.60245	2.93e-17	sp_Q9Y6I7_WSB1_HUMAN_WD_repeat_and_SOCS_box-containing_protein_1_OS=Homo_sapiens_OX=9606_GN=WSB1_PE=1_SV=1
Cluster-10713.0	241.496	-1.28937	3.05e-17	sp_Q6ZSS7_MFSD6_HUMAN_Major_facilitator_superfamily_domain-containing_protein_6_OS=Homo_sapiens_OX=9606_GN=MFSD6_PE=1_SV=2
Cluster-16710.0	154.524	-3.24449	3.34e-17	sp_P23142_FBLN1_HUMAN_Fibulin-1_OS=Homo_sapiens_OX=9606_GN=FBLN1_PE=1_SV=4
Cluster-3.4062	254.445	2.65827	4.11e-17
Cluster-3.8915	586.971	-1.5898	4.39e-17	sp_Q96EV8_DTBP1_HUMAN_Dysbindin_OS=Homo_sapiens_OX=9606_GN=DTNBP1_PE=1_SV=1
Cluster-11520.1	138.273	3.12393	4.81e-17	sp_Q5EAW4_MCM10_XENLA_Protein_MCM10_homolog_OS=Xenopus_laevis_OX=8355_GN=mcm10_PE=1_SV=2
Cluster-12701.0	713.123	-3.23181	5.42e-17	sp_Q2QL79_CAV1_DIDVI_Caveolin-1_OS=Didelphis_virginiana_OX=9267_GN=CAV1_PE=3_SV=1
Cluster-7114.0	594.175	-3.09494	5.42e-17	sp_P18581_CTR2_MOUSE_Cationic_amino_acid_transporter_2_OS=Mus_musculus_OX=10090_GN=Slc7a2_PE=1_SV=3
Cluster-3.12026	214.495	2.55051	5.44e-17
Cluster-3.9593	1523.71	-1.71476	5.91e-17	sp_P31722_C1QC_RAT_Complement_C1q_subcomponent_subunit_C_OS=Rattus_norvegicus_OX=10116_GN=C1qc_PE=1_SV=2
Cluster-3.294	96.8	1.74843	6.02e-17
Cluster-3.3918	1453.88	2.03732	7.07e-17
Cluster-13511.0	129.398	2.05865	8.17e-17
Cluster-3.2006	212.241	-1.97655	8.57e-17	sp_O75131_CPNE3_HUMAN_Copine-3_OS=Homo_sapiens_OX=9606_GN=CPNE3_PE=1_SV=1
Cluster-7873.0	742.638	-2.09113	1.14e-16	sp_Q561L1_PUA1A_XENLA_Adenylosuccinate_synthetase_isozyme_1_A_OS=Xenopus_laevis_OX=8355_GN=adssl1-a_PE=2_SV=1
Cluster-9350.0	67.1853	1.91298	1.27e-16
Cluster-14846.0	133.766	2.06046	1.29e-16	sp_P11369_LORF2_MOUSE_LINE-1_retrotransposable_element_ORF2_protein_OS=Mus_musculus_OX=10090_GN=Pol_PE=1_SV=2
Cluster-14983.2	129.48	-3.40619	1.38e-16	sp_O18993_CP3AL_CALJA_Cytochrome_P450_3A21_OS=Callithrix_jacchus_OX=9483_GN=CYP3A21_PE=2_SV=1
Cluster-4668.1	193.548	-2.25197	1.38e-16	sp_Q5T0D9_TPRGL_HUMAN_Tumor_protein_p63-regulated_gene_1-like_protein_OS=Homo_sapiens_OX=9606_GN=TPRG1L_PE=1_SV=1
Cluster-9218.0	127.896	-3.20561	1.38e-16	sp_Q5RDC7_RWDD3_PONAB_RWD_domain-containing_protein_3_OS=Pongo_abelii_OX=9601_GN=RWDD3_PE=2_SV=1
Cluster-2503.0	156.581	1.43431	1.49e-16
Cluster-16568.0	453.035	-2.59337	1.57e-16	sp_P08253_MMP2_HUMAN_72_kDa_type_IV_collagenase_OS=Homo_sapiens_OX=9606_GN=MMP2_PE=1_SV=2
Cluster-3.13178	2417.61	-1.61736	1.62e-16
Cluster-3.10832	536.301	1.69367	1.76e-16
Cluster-3.4841	2473.81	-4.43836	1.8e-16	sp_Q05982_NDKA_RAT_Nucleoside_diphosphate_kinase_A_OS=Rattus_norvegicus_OX=10116_GN=Nme1_PE=1_SV=1
Cluster-14017.0	2516.56	-3.2691	1.81e-16	sp_Q4AEH7_GPX2_SAPAP_Glutathione_peroxidase_2_OS=Sapajus_apella_OX=9515_GN=GPX2_PE=2_SV=2
Cluster-3.4047	2994.14	-2.32189	2e-16
Cluster-3.8121	353.396	2.12371	2.17e-16
Cluster-3.11694	900.079	-2.45877	2.24e-16	sp_Q2KJ81_AP1M1_BOVIN_AP-1_complex_subunit_mu-1_OS=Bos_taurus_OX=9913_GN=AP1M1_PE=1_SV=3
Cluster-1721.0	159.776	-5.06585	2.37e-16	sp_Q9QUK0_CDKL2_MOUSE_Cyclin-dependent_kinase-like_2_OS=Mus_musculus_OX=10090_GN=Cdkl2_PE=2_SV=1
Cluster-1761.0	144.261	3.00528	2.5e-16	sp_B2GU58_KIF11_XENTR_Kinesin-like_protein_KIF11_OS=Xenopus_tropicalis_OX=8364_GN=kif11_PE=2_SV=1
Cluster-10125.0	3004.39	-1.55184	2.73e-16	sp_Q90ZD5_CRDL1_CHICK_Chordin-like_protein_1_OS=Gallus_gallus_OX=9031_GN=CHRDL1_PE=2_SV=1
Cluster-13795.0	239.58	2.00618	2.74e-16
Cluster-928.1	425.69	-2.25135	3.35e-16	sp_Q3UMF0_COBL1_MOUSE_Cordon-bleu_protein-like_1_OS=Mus_musculus_OX=10090_GN=Cobll1_PE=1_SV=2
Cluster-4154.0	221.819	-2.54108	3.84e-16	sp_Q6UWJ8_C16L2_HUMAN_CD164_sialomucin-like_2_protein_OS=Homo_sapiens_OX=9606_GN=CD164L2_PE=1_SV=2
Cluster-2453.0	5173.49	-2.04743	4.02e-16	sp_O43854_EDIL3_HUMAN_EGF-like_repeat_and_discoidin_I-like_domain-containing_protein_3_OS=Homo_sapiens_OX=9606_GN=EDIL3_PE=1_SV=1
Cluster-3.118	786.076	-1.47481	4.22e-16	sp_Q96AA8_JKIP2_HUMAN_Janus_kinase_and_microtubule-interacting_protein_2_OS=Homo_sapiens_OX=9606_GN=JAKMIP2_PE=1_SV=1
Cluster-6100.0	60.4714	-4.40387	4.23e-16	sp_Q5VTB9_RN220_HUMAN_E3_ubiquitin-protein_ligase_RNF220_OS=Homo_sapiens_OX=9606_GN=RNF220_PE=1_SV=1
Cluster-10335.1	1652.2	-3.32408	4.25e-16
Cluster-3.70	201.728	2.13088	4.26e-16	sp_D3YWE6_MN1_MOUSE_Transcriptional_activator_MN1_OS=Mus_musculus_OX=10090_GN=Mn1_PE=2_SV=1
Cluster-10692.0	892.077	-1.40323	4.27e-16	sp_Q96T60_PNKP_HUMAN_Bifunctional_polynucleotide_phosphatase/kinase_OS=Homo_sapiens_OX=9606_GN=PNKP_PE=1_SV=1
Cluster-16259.0	355.565	-2.08207	4.29e-16	sp_Q9NYB5_SO1C1_HUMAN_Solute_carrier_organic_anion_transporter_family_member_1C1_OS=Homo_sapiens_OX=9606_GN=SLCO1C1_PE=2_SV=1
Cluster-9623.0	1235.08	1.98786	4.37e-16
Cluster-3.3429	166.456	1.32036	4.42e-16	sp_Q6A1G2_FUT11_XENTR_Alpha-(1,3)-fucosyltransferase_11_OS=Xenopus_tropicalis_OX=8364_GN=fut11_PE=2_SV=1
Cluster-6738.1	299.262	-1.69604	4.42e-16	sp_P39059_COFA1_HUMAN_Collagen_alpha-1(XV)_chain_OS=Homo_sapiens_OX=9606_GN=COL15A1_PE=1_SV=2
Cluster-16386.0	162.733	-3.1845	4.94e-16	sp_Q9BZQ8_NIBAN_HUMAN_Protein_Niban_OS=Homo_sapiens_OX=9606_GN=FAM129A_PE=1_SV=1
Cluster-5774.0	311.096	-2.62149	5.02e-16	sp_Q63538_MK12_RAT_Mitogen-activated_protein_kinase_12_OS=Rattus_norvegicus_OX=10116_GN=Mapk12_PE=1_SV=1
Cluster-3.6621	1150.09	1.18684	5.53e-16
Cluster-3.6033	553.882	1.58453	5.96e-16
Cluster-14107.1	2334.39	1.53187	5.97e-16	sp_Q499E5_STOX2_MOUSE_Storkhead-box_protein_2_OS=Mus_musculus_OX=10090_GN=Stox2_PE=2_SV=2
Cluster-12828.0	556.125	-3.31552	6.17e-16	sp_P49813_TMOD1_MOUSE_Tropomodulin-1_OS=Mus_musculus_OX=10090_GN=Tmod1_PE=1_SV=2
Cluster-3.5146	702.092	-1.94431	6.69e-16
Cluster-2575.0	3622.82	-2.75887	6.9e-16	sp_Q14721_KCNB1_HUMAN_Potassium_voltage-gated_channel_subfamily_B_member_1_OS=Homo_sapiens_OX=9606_GN=KCNB1_PE=1_SV=2
Cluster-9515.0	148.285	1.97246	7.27e-16
Cluster-3.4522	131.27	2.09045	7.45e-16	sp_O00370_LORF2_HUMAN_LINE-1_retrotransposable_element_ORF2_protein_OS=Homo_sapiens_OX=9606_PE=1_SV=1
Cluster-539.0	3043.44	-1.15345	7.51e-16	sp_Q9UHG0_DCDC2_HUMAN_Doublecortin_domain-containing_protein_2_OS=Homo_sapiens_OX=9606_GN=DCDC2_PE=1_SV=2
Cluster-3.868	4468.43	-1.37862	8.67e-16	sp_Q5RBL9_RTN3_PONAB_Reticulon-3_OS=Pongo_abelii_OX=9601_GN=RTN3_PE=2_SV=1
Cluster-3.7139	72.9069	3.16565	9.35e-16	sp_Q4R623_DEP1B_MACFA_DEP_domain-containing_protein_1B_OS=Macaca_fascicularis_OX=9541_GN=DEPDC1B_PE=2_SV=1
Cluster-198.0	598.051	-2.6484	9.92e-16	sp_Q96PX9_PKH4B_HUMAN_Pleckstrin_homology_domain-containing_family_G_member_4B_OS=Homo_sapiens_OX=9606_GN=PLEKHG4B_PE=1_SV=4
Cluster-3.12972	415.389	1.70592	1.05e-15
Cluster-6395.0	456.347	-2.70193	1.17e-15	sp_Q5NVP3_F107A_PONAB_Protein_FAM107A_OS=Pongo_abelii_OX=9601_GN=FAM107A_PE=2_SV=1
Cluster-15632.1	473.972	1.29146	1.32e-15	sp_Q9P243_ZFAT_HUMAN_Zinc_finger_protein_ZFAT_OS=Homo_sapiens_OX=9606_GN=ZFAT_PE=1_SV=2
Cluster-6855.0	1643.02	1.30136	1.42e-15
Cluster-4523.1	120.758	2.23576	1.49e-15	sp_Q90XB3_OLIG2_CHICK_Oligodendrocyte_transcription_factor_2_OS=Gallus_gallus_OX=9031_GN=OLIG2_PE=2_SV=1
Cluster-3.622	390.149	1.76735	1.57e-15
Cluster-3.10805	164.437	-2.89873	1.63e-15
Cluster-5351.0	724.983	-2.66603	1.63e-15	sp_P15586_GNS_HUMAN_N-acetylglucosamine-6-sulfatase_OS=Homo_sapiens_OX=9606_GN=GNS_PE=1_SV=3
Cluster-11735.0	553.292	-2.69951	1.76e-15	sp_Q9P2E7_PCD10_HUMAN_Protocadherin-10_OS=Homo_sapiens_OX=9606_GN=PCDH10_PE=2_SV=2
Cluster-15233.0	834.131	-3.26509	1.87e-15	sp_P13731_SERPH_CHICK_Serpin_H1_OS=Gallus_gallus_OX=9031_GN=SERPINH1_PE=1_SV=2
Cluster-3.10081	1794.95	-1.77222	1.93e-15	sp_P22448_RARB_CHICK_Retinoic_acid_receptor_beta_OS=Gallus_gallus_OX=9031_GN=RARB_PE=2_SV=2
Cluster-3.9357	1091.13	-1.39432	1.94e-15	sp_Q15650_TRIP4_HUMAN_Activating_signal_cointegrator_1_OS=Homo_sapiens_OX=9606_GN=TRIP4_PE=1_SV=4
Cluster-3.688	227.278	-2.23752	1.95e-15	sp_A1YG88_ZNF16_PANPA_Zinc_finger_protein_16_OS=Pan_paniscus_OX=9597_GN=ZNF16_PE=3_SV=1
Cluster-3.129	141.096	2.3398	1.96e-15	sp_P62287_ASPM_COLGU_Abnormal_spindle-like_microcephaly-associated_protein_homolog_OS=Colobus_guereza_OX=33548_GN=ASPM_PE=3_SV=1
Cluster-3.3718	807.58	1.42171	1.97e-15
Cluster-5543.0	1829.81	-2.04866	1.97e-15	sp_Q2KI18_PLPL2_BOVIN_Patatin-like_phospholipase_domain-containing_protein_2_OS=Bos_taurus_OX=9913_GN=PNPLA2_PE=2_SV=1
Cluster-7887.1	747.94	-2.31521	1.97e-15
Cluster-12744.0	168.874	-2.39543	2.07e-15	sp_O19477_HMR1_RAT_Major_histocompatibility_complex_class_I-related_gene_protein_OS=Rattus_norvegicus_OX=10116_GN=Mr1_PE=2_SV=2
Cluster-3.4396	6008.34	-2.8804	2.09e-15	sp_O42364_APOEB_DANRE_Apolipoprotein_Eb_OS=Danio_rerio_OX=7955_GN=apoeb_PE=2_SV=1
Cluster-3468.0	244.756	2.34139	2.1e-15
Cluster-4857.2	1694.67	1.57558	2.23e-15	sp_Q6XZF7_DNMBP_HUMAN_Dynamin-binding_protein_OS=Homo_sapiens_OX=9606_GN=DNMBP_PE=1_SV=1
Cluster-9094.0	237.953	-2.29742	2.46e-15	sp_Q8BUG5_CAYP2_MOUSE_Calcyphosin-2_OS=Mus_musculus_OX=10090_GN=Caps2_PE=2_SV=2
Cluster-3.6453	87.7692	1.71024	2.6e-15	sp_O14656_TOR1A_HUMAN_Torsin-1A_OS=Homo_sapiens_OX=9606_GN=TOR1A_PE=1_SV=1
Cluster-3.822	313.655	-2.75276	2.72e-15	sp_Q91499_DSA2B_TORMA_Dispanin_subfamily_A_member_2b_OS=Torpedo_marmorata_OX=7788_PE=2_SV=1
Cluster-1096.0	450.168	-1.66169	2.78e-15	sp_Q7SIF8_FGF1_NOTVI_Fibroblast_growth_factor_1_(Fragment)_OS=Notophthalmus_viridescens_OX=8316_GN=fgf1_PE=1_SV=1
Cluster-6163.1	213.59	-2.49446	2.9e-15	sp_Q99075_HBEGF_HUMAN_Proheparin-binding_EGF-like_growth_factor_OS=Homo_sapiens_OX=9606_GN=HBEGF_PE=1_SV=1
Cluster-3.1031	227.023	-4.66665	3e-15
Cluster-9560.0	1893.6	-1.82618	3.12e-15	sp_Q3MHW9_NB5R1_BOVIN_NADH-cytochrome_b5_reductase_1_OS=Bos_taurus_OX=9913_GN=CYB5R1_PE=2_SV=1
Cluster-3.8658	415.638	1.75605	3.34e-15
Cluster-3.9230	547.327	1.63405	3.47e-15
Cluster-16314.0	2349.77	-1.45052	3.87e-15	sp_Q9D818_SAPC2_MOUSE_Suppressor_APC_domain-containing_protein_2_OS=Mus_musculus_OX=10090_GN=Sapcd2_PE=1_SV=1
Cluster-3.10739	26558.4	2.7684	3.87e-15
Cluster-14784.1	956.254	-3.1502	3.95e-15	sp_Q5I019_TDRP_XENLA_Testis_development-related_protein_OS=Xenopus_laevis_OX=8355_GN=tdrp_PE=2_SV=1
Cluster-5720.0	2894.29	-1.31515	4.27e-15	sp_Q3ZBH3_CD151_BOVIN_CD151_antigen_OS=Bos_taurus_OX=9913_GN=CD151_PE=2_SV=1
Cluster-3.7137	401.465	1.37834	4.41e-15
Cluster-3.7922	93.7158	2.605	4.63e-15
Cluster-2641.0	376.241	-3.31134	4.67e-15	sp_Q16880_CGT_HUMAN_2-hydroxyacylsphingosine_1-beta-galactosyltransferase_OS=Homo_sapiens_OX=9606_GN=UGT8_PE=2_SV=2
Cluster-14888.0	11678.2	-2.39899	5.84e-15
Cluster-16747.1	91.8345	2.29492	5.95e-15
Cluster-3.7644	87.2878	2.5062	5.99e-15
Cluster-870.0	2967.61	1.71256	6.13e-15	sp_Q9HCK4_ROBO2_HUMAN_Roundabout_homolog_2_OS=Homo_sapiens_OX=9606_GN=ROBO2_PE=1_SV=2
Cluster-1766.0	85.3079	-2.60759	6.52e-15	sp_Q8CHQ6_TM125_MOUSE_Transmembrane_protein_125_OS=Mus_musculus_OX=10090_GN=Tmem125_PE=2_SV=1
Cluster-14385.1	126.439	1.90846	6.76e-15
Cluster-3.9233	444.958	-1.75488	6.97e-15	sp_P63132_PO113_HUMAN_Endogenous_retrovirus_group_K_member_113_Pol_protein_OS=Homo_sapiens_OX=9606_GN=HERVK_113_PE=3_SV=1
Cluster-11842.0	666.123	-3.4458	7e-15	sp_P80020_FABP6_RAT_Gastrotropin_OS=Rattus_norvegicus_OX=10116_GN=Fabp6_PE=1_SV=3
Cluster-10129.0	798.954	-1.66178	7.64e-15	sp_A6NGB7_TM221_HUMAN_Transmembrane_protein_221_OS=Homo_sapiens_OX=9606_GN=TMEM221_PE=4_SV=3
Cluster-3.11771	1225.92	-1.86939	7.89e-15	sp_Q6DIY2_MTND_XENTR_1,2-dihydroxy-3-keto-5-methylthiopentene_dioxygenase_OS=Xenopus_tropicalis_OX=8364_GN=adi1_PE=2_SV=1
Cluster-8620.0	100.586	-4.69416	7.89e-15	sp_Q3SB11_CALGL_TROCA_Calglandulin_OS=Tropidechis_carinatus_OX=100989_PE=2_SV=1
Cluster-9749.0	101.044	-2.20487	7.89e-15	sp_Q62936_DLG3_RAT_Disks_large_homolog_3_OS=Rattus_norvegicus_OX=10116_GN=Dlg3_PE=1_SV=1
Cluster-3.6189	281.403	-1.08717	7.9e-15
Cluster-10065.0	551.676	1.05572	7.96e-15	sp_Q6DIH3_MCM2_XENTR_DNA_replication_licensing_factor_mcm2_OS=Xenopus_tropicalis_OX=8364_GN=mcm2_PE=2_SV=1
Cluster-3.11835	996.717	-2.67827	8.04e-15	sp_O88823_JTB_RAT_Protein_JTB_OS=Rattus_norvegicus_OX=10116_GN=Jtb_PE=2_SV=1
Cluster-15984.0	137.035	2.14693	8.52e-15
Cluster-3.4922	128.557	1.80549	8.78e-15
Cluster-3.2314	137.239	-2.69306	8.82e-15	sp_Q4V892_SIGIR_RAT_Single_Ig_IL-1-related_receptor_OS=Rattus_norvegicus_OX=10116_GN=Sigirr_PE=2_SV=1
Cluster-7731.0	106.386	-5.58164	8.82e-15	sp_P01009_A1AT_HUMAN_Alpha-1-antitrypsin_OS=Homo_sapiens_OX=9606_GN=SERPINA1_PE=1_SV=3
Cluster-10394.0	4421.08	-2.22327	8.83e-15	sp_P14154_CXA1_CHICK_Gap_junction_alpha-1_protein_OS=Gallus_gallus_OX=9031_GN=GJA1_PE=2_SV=3
Cluster-3.2622	670.434	1.86544	9.02e-15	sp_Q14258_TRI25_HUMAN_E3_ubiquitin/ISG15_ligase_TRIM25_OS=Homo_sapiens_OX=9606_GN=TRIM25_PE=1_SV=2
Cluster-2482.0	358.51	-2.86719	9.25e-15	sp_A5GFW8_GCNT7_PIG_Beta-1,3-galactosyl-O-glycosyl-glycoprotein_beta-1,6-N-acetylglucosaminyltransferase_7_OS=Sus_scrofa_OX=9823_GN=GCNT7_PE=3_SV=1
Cluster-3.4800	97.1075	2.045	9.76e-15	sp_Q5DTZ0_NYNRI_MOUSE_Protein_NYNRIN_OS=Mus_musculus_OX=10090_GN=Nynrin_PE=2_SV=2
Cluster-3512.5	342.314	1.99461	9.85e-15
Cluster-12054.0	2446.23	-2.70639	9.88e-15	sp_Q8R143_PTTG_MOUSE_Pituitary_tumor-transforming_gene_1_protein-interacting_protein_OS=Mus_musculus_OX=10090_GN=Pttg1ip_PE=1_SV=1
Cluster-7377.0	429.844	-2.5058	9.88e-15	sp_Q90XD2_SPEB_CHICK_Agmatinase,_mitochondrial_OS=Gallus_gallus_OX=9031_GN=AGMAT_PE=2_SV=1
Cluster-3.12890	91.7739	1.36894	9.91e-15
Cluster-3.5513	229.554	1.70567	9.91e-15
Cluster-3.12185	568.328	1.35407	9.99e-15	sp_Q8NG08_HELB_HUMAN_DNA_helicase_B_OS=Homo_sapiens_OX=9606_GN=HELB_PE=1_SV=2
Cluster-3.2008	105.339	1.88198	1.06e-14	sp_Q8IVU3_HERC6_HUMAN_Probable_E3_ubiquitin-protein_ligase_HERC6_OS=Homo_sapiens_OX=9606_GN=HERC6_PE=2_SV=2
Cluster-3.12686	104.13	3.67822	1.08e-14	sp_Q9GLN5_BIRC5_PIG_Baculoviral_IAP_repeat-containing_protein_5_OS=Sus_scrofa_OX=9823_GN=BIRC5_PE=2_SV=1
Cluster-3.1740	203.44	1.63938	1.15e-14	sp_P11369_LORF2_MOUSE_LINE-1_retrotransposable_element_ORF2_protein_OS=Mus_musculus_OX=10090_GN=Pol_PE=1_SV=2
Cluster-6675.0	1487.61	-2.10937	1.19e-14	sp_P58005_SESN3_HUMAN_Sestrin-3_OS=Homo_sapiens_OX=9606_GN=SESN3_PE=1_SV=2
Cluster-3855.0	256.815	2.4712	1.21e-14	sp_Q8IVU1_IGDC3_HUMAN_Immunoglobulin_superfamily_DCC_subclass_member_3_OS=Homo_sapiens_OX=9606_GN=IGDCC3_PE=2_SV=2
Cluster-5646.0	255.908	-2.0404	1.25e-14	sp_Q0P5X1_LRIQ1_MOUSE_Leucine-rich_repeat_and_IQ_domain-containing_protein_1_OS=Mus_musculus_OX=10090_GN=Lrriq1_PE=2_SV=2
Cluster-19.0	323.338	-3.91771	1.33e-14
Cluster-15786.0	105.423	-1.84991	1.37e-14	sp_O42184_CLIP1_CHICK_CAP-Gly_domain-containing_linker_protein_1_OS=Gallus_gallus_OX=9031_GN=CLIP1_PE=2_SV=1
Cluster-3.1448	136.438	-2.02811	1.37e-14	sp_P22309_UD11_HUMAN_UDP-glucuronosyltransferase_1-1_OS=Homo_sapiens_OX=9606_GN=UGT1A1_PE=1_SV=1
Cluster-8510.0	175.216	2.17499	1.37e-14
Cluster-3015.0	635.123	-2.61963	1.43e-14	sp_Q5RBU7_PCP_PONAB_Lysosomal_Pro-X_carboxypeptidase_OS=Pongo_abelii_OX=9601_GN=PRCP_PE=2_SV=1
Cluster-3.7378	255.288	-1.8723	1.49e-14	sp_Q9BYX4_IFIH1_HUMAN_Interferon-induced_helicase_C_domain-containing_protein_1_OS=Homo_sapiens_OX=9606_GN=IFIH1_PE=1_SV=3
Cluster-15056.0	179.818	2.18476	1.51e-14
Cluster-8203.0	82849.9	-2.90634	1.63e-14	sp_Q62622_4EBP1_RAT_Eukaryotic_translation_initiation_factor_4E-binding_protein_1_OS=Rattus_norvegicus_OX=10116_GN=Eif4ebp1_PE=1_SV=3
Cluster-9732.0	84.632	-3.66599	1.63e-14	sp_Q3SYY7_OCAD2_BOVIN_OCIA_domain-containing_protein_2_OS=Bos_taurus_OX=9913_GN=OCIAD2_PE=2_SV=1
Cluster-10863.0	175.593	2.20005	1.65e-14
Cluster-3.7104	635.569	-1.31003	1.73e-14	sp_P84335_TPM1_LIZAU_Tropomyosin_alpha-1_chain_OS=Liza_aurata_OX=48191_PE=1_SV=1
Cluster-9479.0	106.635	2.73472	1.73e-14
Cluster-11740.1	6050.62	-2.0099	1.79e-14	sp_Q02819_NUCB1_MOUSE_Nucleobindin-1_OS=Mus_musculus_OX=10090_GN=Nucb1_PE=1_SV=2
Cluster-9592.0	276.28	-2.32033	1.8e-14	sp_Q8N4X5_AF1L2_HUMAN_Actin_filament-associated_protein_1-like_2_OS=Homo_sapiens_OX=9606_GN=AFAP1L2_PE=1_SV=1
Cluster-12212.0	2834.39	-1.56477	1.84e-14	sp_Q0VCR4_PPR3C_BOVIN_Protein_phosphatase_1_regulatory_subunit_3C_OS=Bos_taurus_OX=9913_GN=PPP1R3C_PE=2_SV=1
Cluster-14520.0	205.775	-2.63064	1.84e-14
Cluster-7614.0	109.312	-3.31497	1.84e-14	sp_A5PJU6_HYKK_BOVIN_Hydroxylysine_kinase_OS=Bos_taurus_OX=9913_GN=HYKK_PE=2_SV=1
Cluster-3.5442	376.016	2.19361	1.89e-14	sp_Q5U379_SNF5_DANRE_SWI/SNF-related_matrix-associated_actin-dependent_regulator_of_chromatin_subfamily_B_member_1-A_OS=Danio_rerio_OX=7955_GN=smarcb1a_PE=2_SV=1
Cluster-3.12433	323.152	-1.44974	2.07e-14
Cluster-16570.0	228.097	1.26939	2.08e-14	sp_Q9QYG8_UCK2_RAT_Uridine-cytidine_kinase_2_OS=Rattus_norvegicus_OX=10116_GN=Uck2_PE=2_SV=2
Cluster-5916.0	106.673	1.64716	2.2e-14
Cluster-3.9295	432.796	1.44489	2.34e-14	sp_O08584_KLF6_MOUSE_Krueppel-like_factor_6_OS=Mus_musculus_OX=10090_GN=Klf6_PE=2_SV=3
Cluster-3.512	1738.04	-1.32784	2.43e-14	sp_Q9BZV1_UBXN6_HUMAN_UBX_domain-containing_protein_6_OS=Homo_sapiens_OX=9606_GN=UBXN6_PE=1_SV=1
Cluster-11542.1	4353.23	-1.36148	2.63e-14	sp_P17926_NFIC_CHICK_Nuclear_factor_1_C-type_OS=Gallus_gallus_OX=9031_GN=NFIC_PE=1_SV=1
Cluster-8610.0	284.807	2.1612	2.74e-14
Cluster-8158.0	924.804	-2.64523	2.84e-14	sp_Q00780_CO8A1_MOUSE_Collagen_alpha-1(VIII)_chain_OS=Mus_musculus_OX=10090_GN=Col8a1_PE=1_SV=3
Cluster-1907.0	73.0208	-4.10245	2.85e-14	sp_Q95LR4_ASB17_MACFA_Ankyrin_repeat_and_SOCS_box_protein_17_OS=Macaca_fascicularis_OX=9541_GN=ASB17_PE=2_SV=1
Cluster-3.7893	221.664	3.03815	2.97e-14	sp_P43346_DCK_MOUSE_Deoxycytidine_kinase_OS=Mus_musculus_OX=10090_GN=Dck_PE=1_SV=1
Cluster-5871.0	2221.53	-1.16998	3.21e-14	sp_Q9Y3C5_RNF11_HUMAN_RING_finger_protein_11_OS=Homo_sapiens_OX=9606_GN=RNF11_PE=1_SV=1
Cluster-6883.0	480.506	-2.53866	3.21e-14	sp_Q6PFT6_TMM47_DANRE_Transmembrane_protein_47_OS=Danio_rerio_OX=7955_GN=tmem47_PE=2_SV=1
Cluster-8857.0	51.2468	2.20288	3.22e-14
Cluster-3.9089	482.396	1.36023	3.24e-14
Cluster-3.10442	344.241	1.50999	3.27e-14	sp_O00370_LORF2_HUMAN_LINE-1_retrotransposable_element_ORF2_protein_OS=Homo_sapiens_OX=9606_PE=1_SV=1
Cluster-3.5927	7103.92	-3.40127	3.32e-14	sp_Q811D0_DLG1_MOUSE_Disks_large_homolog_1_OS=Mus_musculus_OX=10090_GN=Dlg1_PE=1_SV=1
Cluster-13040.0	368.252	2.74995	3.49e-14
Cluster-7917.0	411.178	-2.87137	3.51e-14	sp_Q9GZX9_TWSG1_HUMAN_Twisted_gastrulation_protein_homolog_1_OS=Homo_sapiens_OX=9606_GN=TWSG1_PE=1_SV=1
Cluster-3.6761	1212.81	1.68564	4e-14
Cluster-11585.0	144.18	-2.82955	4.19e-14
Cluster-1411.0	169.31	-1.65699	4.19e-14	sp_Q4V7A5_CK024_RAT_Uncharacterized_protein_C11orf24_homolog_OS=Rattus_norvegicus_OX=10116_PE=2_SV=1
Cluster-3581.0	8917.98	-1.47414	4.4e-14	sp_Q63406_MCF2L_RAT_Guanine_nucleotide_exchange_factor_DBS_OS=Rattus_norvegicus_OX=10116_GN=Mcf2l_PE=1_SV=3
Cluster-8629.0	845.202	-1.23562	4.45e-14
Cluster-13421.1	131.322	-2.61328	4.57e-14	sp_Q4FZG9_NUA4L_MOUSE_NADH_dehydrogenase_[ubiquinone]_1_alpha_subcomplex_subunit_4-like_2_OS=Mus_musculus_OX=10090_GN=Ndufa4l2_PE=3_SV=1
Cluster-8551.0	3034.07	-1.3965	4.83e-14	sp_Q9JHG6_RCAN1_MOUSE_Calcipressin-1_OS=Mus_musculus_OX=10090_GN=Rcan1_PE=1_SV=1
Cluster-3.13143	10036.4	1.27776	4.85e-14	sp_P18298_METK2_RAT_S-adenosylmethionine_synthase_isoform_type-2_OS=Rattus_norvegicus_OX=10116_GN=Mat2a_PE=1_SV=1
Cluster-14416.0	56.2864	2.26605	4.89e-14
Cluster-2002.1	98.584	2.27107	4.98e-14
Cluster-3.12459	249.444	1.2517	5.04e-14	sp_P54822_PUR8_MOUSE_Adenylosuccinate_lyase_OS=Mus_musculus_OX=10090_GN=Adsl_PE=1_SV=2
Cluster-3.6208	249146	-2.88352	5.54e-14	sp_P38407_GNAT_XENLA_Guanine_nucleotide-binding_protein_G(t)_subunit_alpha_OS=Xenopus_laevis_OX=8355_GN=gnat_PE=2_SV=2
Cluster-1049.0	818.848	-2.81125	6.31e-14	sp_Q9PU29_CCKN_STRCA_Cholecystokinin_OS=Struthio_camelus_OX=8801_GN=CCK_PE=1_SV=1
Cluster-14758.0	7200.07	-1.81427	6.5e-14	sp_Q5R570_ORML3_PONAB_ORM1-like_protein_3_OS=Pongo_abelii_OX=9601_GN=ORMDL3_PE=2_SV=1
Cluster-16037.1	383.24	-2.86523	6.54e-14	sp_P22734_COMT_RAT_Catechol_O-methyltransferase_OS=Rattus_norvegicus_OX=10116_GN=Comt_PE=1_SV=2
Cluster-3.2782	144.848	-2.98812	6.54e-14	sp_A6H742_PLSI_BOVIN_Plastin-1_OS=Bos_taurus_OX=9913_GN=PLS1_PE=2_SV=1
Cluster-14008.1	509.295	-2.04608	6.62e-14	sp_Q14678_KANK1_HUMAN_KN_motif_and_ankyrin_repeat_domain-containing_protein_1_OS=Homo_sapiens_OX=9606_GN=KANK1_PE=1_SV=3
Cluster-3.8521	110001	-2.8626	6.69e-14	sp_Q63450_KCC1A_RAT_Calcium/calmodulin-dependent_protein_kinase_type_1_OS=Rattus_norvegicus_OX=10116_GN=Camk1_PE=1_SV=2
Cluster-9421.0	72.2732	-4.23501	6.77e-14	sp_P00636_F16P1_PIG_Fructose-1,6-bisphosphatase_1_OS=Sus_scrofa_OX=9823_GN=FBP1_PE=1_SV=4
Cluster-10281.0	6653.25	-2.22396	6.8e-14	sp_Q8R5J9_PRAF3_MOUSE_PRA1_family_protein_3_OS=Mus_musculus_OX=10090_GN=Arl6ip5_PE=1_SV=2
Cluster-6747.0	148.248	3.80331	7.25e-14	sp_Q60FY0_CCNB1_ANGJA_G2/mitotic-specific_cyclin-B1_OS=Anguilla_japonica_OX=7937_GN=ccnb1_PE=2_SV=1
Cluster-7443.0	2649.84	-1.81189	7.38e-14	sp_Q99538_LGMN_HUMAN_Legumain_OS=Homo_sapiens_OX=9606_GN=LGMN_PE=1_SV=1
Cluster-5716.0	157.557	2.47246	7.45e-14	sp_P14381_YTX2_XENLA_Transposon_TX1_uncharacterized_149_kDa_protein_OS=Xenopus_laevis_OX=8355_PE=4_SV=1
Cluster-11611.0	1293.36	-2.69952	7.5e-14	sp_O75629_CREG1_HUMAN_Protein_CREG1_OS=Homo_sapiens_OX=9606_GN=CREG1_PE=1_SV=1
Cluster-3672.0	636.828	-1.16548	7.57e-14	sp_Q8IX30_SCUB3_HUMAN_Signal_peptide,_CUB_and_EGF-like_domain-containing_protein_3_OS=Homo_sapiens_OX=9606_GN=SCUBE3_PE=1_SV=1
Cluster-10115.0	214.73	-1.58922	8.16e-14	sp_Q9H1C4_UN93B_HUMAN_Protein_unc-93_homolog_B1_OS=Homo_sapiens_OX=9606_GN=UNC93B1_PE=1_SV=2
Cluster-3.13282	387.183	-1.43356	8.79e-14	sp_Q3ZBI6_FHL3_BOVIN_Four_and_a_half_LIM_domains_protein_3_OS=Bos_taurus_OX=9913_GN=FHL3_PE=2_SV=1
Cluster-8566.0	3396.65	-3.09799	8.79e-14	sp_Q5TZ80_HOOK1_DANRE_Protein_Hook_homolog_1_OS=Danio_rerio_OX=7955_GN=hook1_PE=2_SV=1
Cluster-11792.1	131.29	1.72409	8.96e-14	sp_Q6ZSG1_RN165_HUMAN_E3_ubiquitin-protein_ligase_RNF165_OS=Homo_sapiens_OX=9606_GN=RNF165_PE=1_SV=1
Cluster-3.3342	66.0696	2.75067	9.02e-14
Cluster-7059.0	135.074	1.70005	9.02e-14
Cluster-636.0	2767.51	-2.43588	9.12e-14	sp_Q8AVH7_EGFL6_XENLA_Epidermal_growth_factor-like_protein_6_OS=Xenopus_laevis_OX=8355_GN=egfl6_PE=2_SV=1
Cluster-1964.0	1486.27	-2.16392	9.17e-14	sp_P46940_IQGA1_HUMAN_Ras_GTPase-activating-like_protein_IQGAP1_OS=Homo_sapiens_OX=9606_GN=IQGAP1_PE=1_SV=1
Cluster-2137.0	177.4	-3.29167	9.25e-14	sp_A4UGR9_XIRP2_HUMAN_Xin_actin-binding_repeat-containing_protein_2_OS=Homo_sapiens_OX=9606_GN=XIRP2_PE=1_SV=2
Cluster-3.5118	70.948	2.14618	9.81e-14
Cluster-5560.0	3812.86	-1.66509	1.01e-13	sp_Q91790_DUS1A_XENLA_Dual_specificity_protein_phosphatase_1-A_OS=Xenopus_laevis_OX=8355_GN=dusp1-a_PE=1_SV=1
Cluster-3.1159	88.6445	-1.61845	1.04e-13	sp_Q96CX3_ZN501_HUMAN_Zinc_finger_protein_501_OS=Homo_sapiens_OX=9606_GN=ZNF501_PE=2_SV=2
Cluster-15103.1	901.545	-2.90546	1.04e-13	sp_Q6J1T3_MT_SCYTO_Metallothionein_OS=Scyliorhinus_torazame_OX=75743_GN=mt_PE=3_SV=1
Cluster-3542.0	345.796	-1.17005	1.05e-13	sp_Q91YE9_5NT1B_MOUSE_Cytosolic_5'-nucleotidase_1B_OS=Mus_musculus_OX=10090_GN=Nt5c1b_PE=2_SV=2
Cluster-3.9296	3096.36	-1.6357	1.06e-13	sp_Q53HL2_BOREA_HUMAN_Borealin_OS=Homo_sapiens_OX=9606_GN=CDCA8_PE=1_SV=2
Cluster-6060.0	67.8561	1.85855	1.08e-13	sp_Q2KJ34_HBP1_BOVIN_HMG_box-containing_protein_1_OS=Bos_taurus_OX=9913_GN=HBP1_PE=2_SV=1
Cluster-336.0	205.797	3.09782	1.2e-13	sp_Q7T3H2_INS1B_DANRE_Insulinoma-associated_protein_1b_OS=Danio_rerio_OX=7955_GN=insm1b_PE=2_SV=1
Cluster-14089.0	1521.73	-1.55837	1.25e-13	sp_Q8WUH6_TM263_HUMAN_Transmembrane_protein_263_OS=Homo_sapiens_OX=9606_GN=TMEM263_PE=1_SV=1
Cluster-3512.4	132.483	1.42972	1.25e-13
Cluster-3.2390	419.958	1.39233	1.34e-13
Cluster-3.626	304.533	-3.28852	1.34e-13	sp_Q86XS5_ANGL5_HUMAN_Angiopoietin-related_protein_5_OS=Homo_sapiens_OX=9606_GN=ANGPTL5_PE=1_SV=3
Cluster-7101.0	99.9341	-2.39922	1.37e-13	sp_A6QLN9_VWA1_BOVIN_von_Willebrand_factor_A_domain-containing_protein_1_OS=Bos_taurus_OX=9913_GN=VWA1_PE=2_SV=1
Cluster-12475.0	184.318	1.34435	1.4e-13	sp_Q6ZN57_ZFP2_HUMAN_Zinc_finger_protein_2_homolog_OS=Homo_sapiens_OX=9606_GN=ZFP2_PE=1_SV=1
Cluster-4952.0	641.074	-2.28349	1.46e-13	sp_Q9JLZ8_SIGIR_MOUSE_Single_Ig_IL-1-related_receptor_OS=Mus_musculus_OX=10090_GN=Sigirr_PE=1_SV=2
Cluster-3.9446	25380.8	-1.08601	1.52e-13	sp_Q08DK3_KLH20_BOVIN_Kelch-like_protein_20_OS=Bos_taurus_OX=9913_GN=KLHL20_PE=2_SV=3
Cluster-3.11795	494.693	1.20335	1.56e-13
Cluster-3.11544	1022.78	-2.95373	1.59e-13
Cluster-3594.0	1272.69	-2.36513	1.59e-13	sp_Q3ZCJ8_CATC_BOVIN_Dipeptidyl_peptidase_1_OS=Bos_taurus_OX=9913_GN=CTSC_PE=2_SV=1
Cluster-10336.2	181.837	-3.25776	1.62e-13	sp_Q66S03_LECG_THANI_Galactose-specific_lectin_nattectin_OS=Thalassophryne_nattereri_OX=289382_PE=1_SV=1
Cluster-10653.0	1238.01	1.0376	1.62e-13
Cluster-10703.0	24740.7	-2.82882	1.62e-13
Cluster-9003.0	67.3325	2.26574	1.65e-13
Cluster-3.8377	307.142	1.23173	1.69e-13	sp_Q810A5_K895L_MOUSE_Uncharacterized_protein_KIAA0895-like_OS=Mus_musculus_OX=10090_GN=Kiaa0895l_PE=2_SV=1
Cluster-3.7397	106.33	-1.81413	1.71e-13	sp_F1MMS9_ITA3_BOVIN_Integrin_alpha-3_OS=Bos_taurus_OX=9913_GN=ITGA3_PE=3_SV=1
Cluster-4692.0	401.184	-2.61518	1.72e-13	sp_P12839_NFM_RAT_Neurofilament_medium_polypeptide_OS=Rattus_norvegicus_OX=10116_GN=Nefm_PE=1_SV=4
Cluster-10014.1	288.985	-3.41016	1.76e-13	sp_Q9NQM4_PIHD3_HUMAN_Protein_PIH1D3_OS=Homo_sapiens_OX=9606_GN=PIH1D3_PE=1_SV=1
Cluster-12427.0	412.733	-2.37941	1.76e-13	sp_P35219_CAH8_HUMAN_Carbonic_anhydrase-related_protein_OS=Homo_sapiens_OX=9606_GN=CA8_PE=1_SV=3
Cluster-3.10247	178.167	1.92216	1.78e-13
Cluster-10335.0	369.747	-3.21781	1.81e-13
Cluster-1139.0	955.748	2.56695	1.83e-13	sp_O42130_TOP2A_CHICK_DNA_topoisomerase_2-alpha_OS=Gallus_gallus_OX=9031_GN=TOP2A_PE=2_SV=2
Cluster-3.2287	306.591	1.84042	1.83e-13
Cluster-3.11055	1155.65	1.58622	1.84e-13
Cluster-3.12412	479.714	1.29507	1.89e-13
Cluster-3.2237	657.528	1.81997	1.91e-13
Cluster-4858.0	847.191	-2.80625	1.99e-13	sp_Q5M8G6_IMPTA_XENTR_Protein_IMPACT-A_OS=Xenopus_tropicalis_OX=8364_GN=impact-A_PE=2_SV=1
Cluster-1820.0	207.967	1.95633	2.06e-13
Cluster-3.1004	7228.3	-2.95737	2.14e-13
Cluster-3.11251	2987.38	-2.00264	2.26e-13	sp_Q02372_NDUB8_BOVIN_NADH_dehydrogenase_[ubiquinone]_1_beta_subcomplex_subunit_8,_mitochondrial_OS=Bos_taurus_OX=9913_GN=NDUFB8_PE=1_SV=1
Cluster-12872.0	1618.57	-3.29154	2.32e-13
Cluster-3.11058	736.473	1.23507	2.33e-13	sp_P11369_LORF2_MOUSE_LINE-1_retrotransposable_element_ORF2_protein_OS=Mus_musculus_OX=10090_GN=Pol_PE=1_SV=2
Cluster-16519.0	156.6	-3.60968	2.35e-13	sp_A8YPR9_SVMI1_CERCE_Snake_venom_metalloprotease_inhibitor_02A10_OS=Cerastes_cerastes_OX=8697_GN=Svmpi-Cce12_PE=1_SV=1
Cluster-3.7498	69038.1	-3.04617	2.37e-13
Cluster-6810.0	92.2647	2.36106	2.37e-13
Cluster-7045.0	305.447	-1.27162	2.38e-13
Cluster-3.7703	254.248	1.1958	2.4e-13
Cluster-3.4398	401.039	2.00212	2.45e-13
Cluster-3.12897	367.351	-2.50927	2.56e-13	sp_Q02084_A33_PLEWA_Zinc-binding_protein_A33_OS=Pleurodeles_waltl_OX=8319_PE=1_SV=2
Cluster-12216.0	1640.31	-1.33008	2.66e-13	sp_Q32KN9_PRLD1_BOVIN_PRELI_domain-containing_protein_1,_mitochondrial_OS=Bos_taurus_OX=9913_GN=PRELID1_PE=2_SV=1
Cluster-3.4259	146.464	-1.63448	2.84e-13	sp_Q640R3_HECAM_MOUSE_Hepatocyte_cell_adhesion_molecule_OS=Mus_musculus_OX=10090_GN=Hepacam_PE=1_SV=2
Cluster-3.11872	552.681	-1.19249	3.12e-13	sp_Q15011_HERP1_HUMAN_Homocysteine-responsive_endoplasmic_reticulum-resident_ubiquitin-like_domain_member_1_protein_OS=Homo_sapiens_OX=9606_GN=HERPUD1_PE=1_SV=1
Cluster-3.3488	494.61	-2.56276	3.17e-13	sp_Q5SW96_ARH_HUMAN_Low_density_lipoprotein_receptor_adapter_protein_1_OS=Homo_sapiens_OX=9606_GN=LDLRAP1_PE=1_SV=3
Cluster-3.11074	111.833	2.00372	3.17e-13
Cluster-3.8631	70.02	2.15592	3.21e-13
Cluster-3.1647	676.199	-2.71284	3.4e-13	sp_Q9GZR5_ELOV4_HUMAN_Elongation_of_very_long_chain_fatty_acids_protein_4_OS=Homo_sapiens_OX=9606_GN=ELOVL4_PE=1_SV=1
Cluster-3.11518	272.448	-2.46732	3.47e-13	sp_P10646_TFPI1_HUMAN_Tissue_factor_pathway_inhibitor_OS=Homo_sapiens_OX=9606_GN=TFPI_PE=1_SV=1
Cluster-14795.0	136.488	-2.65539	3.49e-13	sp_Q9ULS5_TMCC3_HUMAN_Transmembrane_and_coiled-coil_domain_protein_3_OS=Homo_sapiens_OX=9606_GN=TMCC3_PE=2_SV=3
Cluster-673.0	524.743	-2.09394	3.49e-13	sp_Q8TB73_NDNF_HUMAN_Protein_NDNF_OS=Homo_sapiens_OX=9606_GN=NDNF_PE=1_SV=2
Cluster-3.8860	1762.36	-1.38745	3.63e-13	sp_Q9R0D6_TCO2_RAT_Transcobalamin-2_OS=Rattus_norvegicus_OX=10116_GN=Tcn2_PE=2_SV=1
Cluster-3.11905	364.144	1.21754	3.65e-13	sp_Q9D9N8_PADC1_MOUSE_Protease-associated_domain-containing_protein_1_OS=Mus_musculus_OX=10090_GN=Pradc1_PE=1_SV=1
Cluster-3.7745	14386.2	2.04128	3.84e-13	sp_P63135_POK7_HUMAN_Endogenous_retrovirus_group_K_member_7_Pol_protein_OS=Homo_sapiens_OX=9606_GN=ERVK-7_PE=3_SV=1
Cluster-3.9829	202.444	1.74049	3.84e-13
Cluster-4653.0	1629.31	1.13772	3.84e-13	sp_Q6ZRP7_QSOX2_HUMAN_Sulfhydryl_oxidase_2_OS=Homo_sapiens_OX=9606_GN=QSOX2_PE=1_SV=3
Cluster-4304.1	244.102	2.4535	3.85e-13	sp_Q5XIA0_DZI1L_RAT_Zinc_finger_protein_DZIP1L_OS=Rattus_norvegicus_OX=10116_GN=Dzip1l_PE=1_SV=1
Cluster-3.7960	1355.99	1.36269	3.86e-13
Cluster-6770.0	120.708	-1.34703	3.86e-13	sp_Q8K174_TMM60_MOUSE_Transmembrane_protein_60_OS=Mus_musculus_OX=10090_GN=Tmem60_PE=2_SV=1
Cluster-3.1994	709.876	-1.04808	3.98e-13	sp_Q95135_EAA3_BOVIN_Excitatory_amino_acid_transporter_3_OS=Bos_taurus_OX=9913_GN=SLC1A1_PE=2_SV=1
Cluster-3.12213	816.233	1.21903	3.99e-13	sp_Q99470_SDF2_HUMAN_Stromal_cell-derived_factor_2_OS=Homo_sapiens_OX=9606_GN=SDF2_PE=1_SV=2
Cluster-3.8767	346.01	-1.7256	3.99e-13	sp_Q00535_CDK5_HUMAN_Cyclin-dependent-like_kinase_5_OS=Homo_sapiens_OX=9606_GN=CDK5_PE=1_SV=3
Cluster-3.4200	229.57	1.90657	4.12e-13	sp_Q32N93_INCEB_XENLA_Inner_centromere_protein_B_OS=Xenopus_laevis_OX=8355_GN=incenp-b_PE=2_SV=1
Cluster-13293.0	442.716	-2.02134	4.64e-13	sp_P53447_ALDOB_SPAAU_Fructose-bisphosphate_aldolase_B_OS=Sparus_aurata_OX=8175_GN=aldob_PE=2_SV=2
Cluster-11929.0	12367.4	-1.70292	4.65e-13	sp_B5DEK8_VOPP1_RAT_Vesicular,_overexpressed_in_cancer,_prosurvival_protein_1_OS=Rattus_norvegicus_OX=10116_GN=Vopp1_PE=2_SV=1
Cluster-3.3939	1523.05	-1.77636	4.65e-13	sp_Q66HY7_IF4E3_DANRE_Eukaryotic_translation_initiation_factor_4E_type_3_OS=Danio_rerio_OX=7955_GN=eif4e3_PE=2_SV=1
Cluster-3774.0	489.979	1.63937	4.71e-13	sp_Q2TB18_ASTE1_HUMAN_Protein_asteroid_homolog_1_OS=Homo_sapiens_OX=9606_GN=ASTE1_PE=1_SV=1
Cluster-3.4562	499.539	1.48252	4.78e-13
Cluster-3.9100	124.634	1.78587	5.14e-13
Cluster-6818.0	61.6263	-1.73556	5.21e-13	sp_Q91WC7_NPAL2_MOUSE_NIPA-like_protein_2_OS=Mus_musculus_OX=10090_GN=Nipal2_PE=2_SV=1
Cluster-3.412	800.157	-1.62808	5.25e-13	sp_Q9YH18_QKI_CHICK_Protein_quaking_OS=Gallus_gallus_OX=9031_GN=QKI_PE=2_SV=2
Cluster-3512.2	311.443	1.79212	5.25e-13
Cluster-1627.0	88.1014	-3.89499	5.7e-13	sp_Q7TN05_AP1S3_MOUSE_AP-1_complex_subunit_sigma-3_OS=Mus_musculus_OX=10090_GN=Ap1s3_PE=1_SV=1
Cluster-3.4704	104.331	2.00127	5.72e-13
Cluster-13281.0	3828.48	-2.31655	5.8e-13	sp_Q8AXL1_SAT1_CHICK_Diamine_acetyltransferase_1_OS=Gallus_gallus_OX=9031_GN=SAT1_PE=2_SV=1
Cluster-9517.0	474.331	1.72852	5.91e-13
Cluster-3.824	18707	-2.74032	6.06e-13
Cluster-6603.0	54.2342	-4.17628	6.22e-13
Cluster-12836.0	416.702	-1.28113	6.45e-13	sp_Q66IJ4_PIGM_XENTR_GPI_mannosyltransferase_1_OS=Xenopus_tropicalis_OX=8364_GN=pigm_PE=2_SV=1
Cluster-3610.0	7566.03	-3.53295	6.53e-13	sp_Q8AXA0_B2MG_RAJEG_Beta-2-microglobulin_OS=Raja_eglanteria_OX=33514_GN=b2m_PE=3_SV=1
Cluster-8226.0	559.602	-2.61329	6.74e-13	sp_O75563_SKAP2_HUMAN_Src_kinase-associated_phosphoprotein_2_OS=Homo_sapiens_OX=9606_GN=SKAP2_PE=1_SV=1
Cluster-339.0	415.471	1.17231	7.35e-13	sp_Q640V2_RMD5A_XENTR_Protein_RMD5_homolog_A_OS=Xenopus_tropicalis_OX=8364_GN=rmnd5a_PE=2_SV=1
Cluster-6397.0	13392.9	-2.9968	7.39e-13	sp_Q4R6R4_BZW2_MACFA_Basic_leucine_zipper_and_W2_domain-containing_protein_2_OS=Macaca_fascicularis_OX=9541_GN=BZW2_PE=2_SV=1
Cluster-3.6869	254.894	-1.22135	7.44e-13	sp_Q9Y5X3_SNX5_HUMAN_Sorting_nexin-5_OS=Homo_sapiens_OX=9606_GN=SNX5_PE=1_SV=1
Cluster-6182.0	53815.2	-3.03627	7.52e-13	sp_P02512_CRYAB_SQUAC_Alpha-crystallin_B_chain_OS=Squalus_acanthias_OX=7797_GN=CRYAB_PE=1_SV=1
Cluster-6272.0	931.828	-1.81882	7.61e-13	sp_Q5BLE8_RETST_DANRE_Putative_all-trans-retinol_13,14-reductase_OS=Danio_rerio_OX=7955_GN=retsat_PE=2_SV=1
Cluster-16090.0	156.898	1.76755	7.63e-13
Cluster-7005.1	2396.18	-2.63968	7.75e-13	sp_P07194_PENKB_XENLA_Proenkephalin-A-B_(Fragment)_OS=Xenopus_laevis_OX=8355_GN=penk-b_PE=3_SV=1
Cluster-3.4089	948.044	1.71241	8.05e-13	sp_Q5RKR3_ISLR2_MOUSE_Immunoglobulin_superfamily_containing_leucine-rich_repeat_protein_2_OS=Mus_musculus_OX=10090_GN=Islr2_PE=1_SV=1
Cluster-16077.1	71.7618	-2.19414	8.11e-13	sp_P43234_CATO_HUMAN_Cathepsin_O_OS=Homo_sapiens_OX=9606_GN=CTSO_PE=2_SV=1
Cluster-3.11458	2230.89	-2.51158	8.4e-13	sp_Q14192_FHL2_HUMAN_Four_and_a_half_LIM_domains_protein_2_OS=Homo_sapiens_OX=9606_GN=FHL2_PE=1_SV=3
Cluster-3.2537	3177.88	-2.91229	8.64e-13	sp_Q5ZI58_F214A_CHICK_Protein_FAM214A_OS=Gallus_gallus_OX=9031_GN=FAM214A_PE=2_SV=2
Cluster-10924.0	2846.2	-2.59375	8.88e-13	sp_Q5RDZ2_CRYL1_PONAB_Lambda-crystallin_homolog_OS=Pongo_abelii_OX=9601_GN=CRYL1_PE=2_SV=3
Cluster-3.9606	404.779	1.47335	8.88e-13
Cluster-3.4157	408.166	2.09785	9.04e-13
Cluster-436.0	200.132	-2.04096	9.34e-13	sp_Q71SY6_OAF_CHICK_Out_at_first_protein_homolog_OS=Gallus_gallus_OX=9031_GN=oaf_PE=2_SV=1
Cluster-3.11511	1163.31	-1.97247	9.52e-13	sp_Q5DTX6_JCAD_MOUSE_Junctional_protein_associated_with_coronary_artery_disease_OS=Mus_musculus_OX=10090_GN=Jcad_PE=1_SV=2
Cluster-6957.1	311.802	1.877	9.52e-13	sp_Q5FWM1_ATAT_XENLA_Alpha-tubulin_N-acetyltransferase_1_OS=Xenopus_laevis_OX=8355_GN=atat1_PE=2_SV=1
Cluster-3.11291	2320.23	-2.75218	9.54e-13	sp_P30568_GSTA_PLEPL_Glutathione_S-transferase_A_OS=Pleuronectes_platessa_OX=8262_PE=2_SV=1
Cluster-12510.0	1561.47	-1.33507	9.66e-13	sp_Q5ZJA3_CDR2_CHICK_Cerebellar_degeneration-related_protein_2_OS=Gallus_gallus_OX=9031_GN=CDR2_PE=2_SV=1
Cluster-3.7368	740.57	-1.26944	9.89e-13	sp_Q9GKN8_PRELP_BOVIN_Prolargin_OS=Bos_taurus_OX=9913_GN=PRELP_PE=2_SV=1
Cluster-3.6171	864.701	-1.78407	1.01e-12	sp_P60904_DNJC5_MOUSE_DnaJ_homolog_subfamily_C_member_5_OS=Mus_musculus_OX=10090_GN=Dnajc5_PE=1_SV=1
Cluster-7211.0	81.1661	2.06265	1.01e-12
Cluster-12285.1	2577.2	-3.1032	1.06e-12	sp_P41976_SODM_BOVIN_Superoxide_dismutase_[Mn],_mitochondrial_OS=Bos_taurus_OX=9913_GN=SOD2_PE=2_SV=1
Cluster-858.0	4351.17	-1.35051	1.07e-12	sp_Q9C0E8_LNP_HUMAN_Endoplasmic_reticulum_junction_formation_protein_lunapark_OS=Homo_sapiens_OX=9606_GN=LNPK_PE=1_SV=2
Cluster-16034.3	58.379	-3.16244	1.08e-12	sp_P01024_CO3_HUMAN_Complement_C3_OS=Homo_sapiens_OX=9606_GN=C3_PE=1_SV=2
Cluster-3.1367	575.923	2.1572	1.16e-12	sp_Q01713_KLF9_RAT_Krueppel-like_factor_9_OS=Rattus_norvegicus_OX=10116_GN=Klf9_PE=2_SV=1
Cluster-414.2	64.9465	-4.39361	1.2e-12	sp_P15428_PGDH_HUMAN_15-hydroxyprostaglandin_dehydrogenase_[NAD(+)]_OS=Homo_sapiens_OX=9606_GN=HPGD_PE=1_SV=1
Cluster-4713.0	454.485	-1.54351	1.21e-12	sp_P08582_TRFM_HUMAN_Melanotransferrin_OS=Homo_sapiens_OX=9606_GN=MELTF_PE=1_SV=2
Cluster-3.9958	203.391	1.8873	1.23e-12
Cluster-16486.1	5476.58	-1.58893	1.28e-12	sp_Q5ZIF1_APMAP_CHICK_Adipocyte_plasma_membrane-associated_protein_OS=Gallus_gallus_OX=9031_GN=APMAP_PE=2_SV=1
Cluster-16428.0	729.929	1.19971	1.3e-12	sp_Q6KEQ9_PC11X_PIG_Protocadherin-11_X-linked_OS=Sus_scrofa_OX=9823_GN=PCDH11X_PE=2_SV=1
Cluster-12466.0	2185.36	-2.70453	1.35e-12	sp_A3KP48_F162B_DANRE_Protein_FAM162B_OS=Danio_rerio_OX=7955_GN=fam162b_PE=2_SV=1
Cluster-11542.0	93.7547	-2.79475	1.37e-12
Cluster-11475.0	160.595	-1.8292	1.46e-12
Cluster-3.12317	340.343	1.84222	1.5e-12
Cluster-3.1164	1642.82	-2.12218	1.51e-12
Cluster-3.1546	6014.1	-3.23245	1.51e-12	sp_Q8TD57_DYH3_HUMAN_Dynein_heavy_chain_3,_axonemal_OS=Homo_sapiens_OX=9606_GN=DNAH3_PE=2_SV=1
Cluster-8378.2	2137.83	-2.77807	1.52e-12	sp_P70697_DCUP_MOUSE_Uroporphyrinogen_decarboxylase_OS=Mus_musculus_OX=10090_GN=Urod_PE=1_SV=2
Cluster-10047.0	1818.68	-1.74365	1.52e-12	sp_O93510_GELS_CHICK_Gelsolin_OS=Gallus_gallus_OX=9031_GN=GSN_PE=2_SV=1
Cluster-3833.2	7671.76	-1.13743	1.55e-12	sp_Q62745_CD81_RAT_CD81_antigen_OS=Rattus_norvegicus_OX=10116_GN=Cd81_PE=1_SV=1
Cluster-12825.0	275.811	-1.66493	1.57e-12	sp_Q6DF55_VASN_XENTR_Vasorin_OS=Xenopus_tropicalis_OX=8364_GN=vasn_PE=2_SV=1
Cluster-13363.0	19917.1	-1.66767	1.58e-12	sp_F7E728_SCG3_XENTR_Secretogranin-3_OS=Xenopus_tropicalis_OX=8364_GN=scg3_PE=2_SV=2
Cluster-14678.0	634.179	-1.5981	1.58e-12	sp_A8WIP6_CDK20_DANRE_Cyclin-dependent_kinase_20_OS=Danio_rerio_OX=7955_GN=cdk20_PE=2_SV=1
Cluster-6662.0	2833.07	-2.20617	1.58e-12
Cluster-314.0	189.432	-3.11146	1.59e-12	sp_P07942_LAMB1_HUMAN_Laminin_subunit_beta-1_OS=Homo_sapiens_OX=9606_GN=LAMB1_PE=1_SV=2
Cluster-5022.0	515.037	-3.40357	1.6e-12	sp_Q8R3G9_TSN8_MOUSE_Tetraspanin-8_OS=Mus_musculus_OX=10090_GN=Tspan8_PE=1_SV=1
Cluster-3772.0	180.466	1.80763	1.65e-12
Cluster-3.3952	128.735	-1.98749	1.81e-12	sp_Q91WB4_PKHF2_MOUSE_Pleckstrin_homology_domain-containing_family_F_member_2_OS=Mus_musculus_OX=10090_GN=Plekhf2_PE=1_SV=1
Cluster-16745.0	87.0648	1.87044	1.81e-12	sp_Q5R4L5_XRN2_PONAB_5'-3'_exoribonuclease_2_OS=Pongo_abelii_OX=9601_GN=XRN2_PE=2_SV=1
Cluster-3.4361	6406.23	-1.66482	1.82e-12	sp_P08240_SRPRA_HUMAN_Signal_recognition_particle_receptor_subunit_alpha_OS=Homo_sapiens_OX=9606_GN=SRPRA_PE=1_SV=2
Cluster-16432.0	225.846	2.80717	1.87e-12
Cluster-3.8650	58.8434	2.44927	1.93e-12
Cluster-3.398	486.271	1.36046	1.94e-12
Cluster-3.6995	2004.35	-1.49639	2.17e-12	sp_Q9P0M2_AKA7G_HUMAN_A-kinase_anchor_protein_7_isoform_gamma_OS=Homo_sapiens_OX=9606_GN=AKAP7_PE=1_SV=2
Cluster-7602.0	12666.1	-1.31385	2.27e-12	sp_Q5XHA0_SCMC1_XENTR_Calcium-binding_mitochondrial_carrier_protein_SCaMC-1_OS=Xenopus_tropicalis_OX=8364_GN=slc25a24_PE=2_SV=1
Cluster-8429.1	101.408	1.25535	2.32e-12	sp_A5PJZ5_NUP93_BOVIN_Nuclear_pore_complex_protein_Nup93_OS=Bos_taurus_OX=9913_GN=NUP93_PE=2_SV=1
Cluster-9933.0	1498.76	-2.57455	2.32e-12	sp_Q5NUA6_NF2L2_BOVIN_Nuclear_factor_erythroid_2-related_factor_2_OS=Bos_taurus_OX=9913_GN=NFE2L2_PE=2_SV=2
Cluster-3.6161	1888.81	-1.39244	2.46e-12	sp_P80895_PIMT_PIG_Protein-L-isoaspartate(D-aspartate)_O-methyltransferase_OS=Sus_scrofa_OX=9823_GN=PCMT1_PE=1_SV=3
Cluster-3.1838	2808.6	-1.94285	2.49e-12	sp_Q4R5M2_CATB_MACFA_Cathepsin_B_OS=Macaca_fascicularis_OX=9541_GN=CTSB_PE=2_SV=1
Cluster-16015.0	3421.31	-1.39694	2.52e-12	sp_Q9R0L9_MUC24_MOUSE_Sialomucin_core_protein_24_OS=Mus_musculus_OX=10090_GN=Cd164_PE=1_SV=1
Cluster-3.4333	175.912	1.60207	2.63e-12
Cluster-10354.1	420.366	1.37523	2.64e-12	sp_Q4QY64_ATAD5_MOUSE_ATPase_family_AAA_domain-containing_protein_5_OS=Mus_musculus_OX=10090_GN=Atad5_PE=1_SV=1
Cluster-8049.0	75.7482	-2.19041	2.68e-12	sp_P53590_SUCB2_PIG_Succinate--CoA_ligase_[GDP-forming]_subunit_beta,_mitochondrial_(Fragment)_OS=Sus_scrofa_OX=9823_GN=SUCLG2_PE=1_SV=2
Cluster-4283.1	756.515	-2.60545	2.72e-12	sp_Q13426_XRCC4_HUMAN_DNA_repair_protein_XRCC4_OS=Homo_sapiens_OX=9606_GN=XRCC4_PE=1_SV=2
Cluster-3.277	67.1189	2.60837	2.75e-12
Cluster-7936.0	288.177	-1.25126	2.76e-12	sp_Q9JMD3_STA10_MOUSE_START_domain-containing_protein_10_OS=Mus_musculus_OX=10090_GN=Stard10_PE=1_SV=1
Cluster-3.12301	324.115	-1.09431	2.77e-12	sp_Q92934_BAD_HUMAN_Bcl2-associated_agonist_of_cell_death_OS=Homo_sapiens_OX=9606_GN=BAD_PE=1_SV=3
Cluster-11693.0	3149.75	-1.52345	2.89e-12	sp_Q8WTS6_SETD7_HUMAN_Histone-lysine_N-methyltransferase_SETD7_OS=Homo_sapiens_OX=9606_GN=SETD7_PE=1_SV=1
Cluster-14409.0	343.204	2.53735	2.91e-12	sp_P02467_CO1A2_CHICK_Collagen_alpha-2(I)_chain_OS=Gallus_gallus_OX=9031_GN=COL1A2_PE=1_SV=3
Cluster-3.12123	126.592	1.56151	2.94e-12
Cluster-6293.0	925.847	-1.79703	2.95e-12	sp_Q9BW60_ELOV1_HUMAN_Elongation_of_very_long_chain_fatty_acids_protein_1_OS=Homo_sapiens_OX=9606_GN=ELOVL1_PE=1_SV=1
Cluster-11155.0	103.186	-1.98028	2.96e-12	sp_P08941_ROS1_CHICK_Proto-oncogene_tyrosine-protein_kinase_ROS_OS=Gallus_gallus_OX=9031_GN=ROS1_PE=1_SV=3
Cluster-3.5768	247.971	2.78	3.1e-12
Cluster-3.801	19925.6	-1.82375	3.1e-12	sp_A6QQY2_KLH13_BOVIN_Kelch-like_protein_13_OS=Bos_taurus_OX=9913_GN=KLHL13_PE=2_SV=1
Cluster-15840.1	107.84	-2.29348	3.13e-12	sp_P29348_GNAT3_RAT_Guanine_nucleotide-binding_protein_G(t)_subunit_alpha-3_OS=Rattus_norvegicus_OX=10116_GN=Gnat3_PE=1_SV=3
Cluster-3.8131	110.614	-2.3221	3.13e-12
Cluster-7629.0	2134.71	-1.38833	3.13e-12	sp_P97478_COQ7_MOUSE_5-demethoxyubiquinone_hydroxylase,_mitochondrial_OS=Mus_musculus_OX=10090_GN=Coq7_PE=1_SV=3
Cluster-3.8611	802.423	-2.08305	3.23e-12	sp_A0JPE1_FA69B_XENTR_Protein_FAM69B_OS=Xenopus_tropicalis_OX=8364_GN=fam69b_PE=2_SV=1
Cluster-3.11421	760.668	1.15249	3.26e-12	sp_Q5T1H1_EYS_HUMAN_Protein_eyes_shut_homolog_OS=Homo_sapiens_OX=9606_GN=EYS_PE=1_SV=5
Cluster-6004.1	2444.88	-1.97311	3.28e-12	sp_Q96L93_KI16B_HUMAN_Kinesin-like_protein_KIF16B_OS=Homo_sapiens_OX=9606_GN=KIF16B_PE=1_SV=2
Cluster-5680.0	970.967	-1.28417	3.29e-12	sp_Q68EX9_CHID1_XENLA_Chitinase_domain-containing_protein_1_OS=Xenopus_laevis_OX=8355_GN=chid1_PE=2_SV=1
Cluster-13587.1	251.242	1.90547	3.4e-12	sp_Q5PPJ9_SHLB2_RAT_Endophilin-B2_OS=Rattus_norvegicus_OX=10116_GN=Sh3glb2_PE=1_SV=2
Cluster-3512.1	71.2872	1.86876	3.49e-12
Cluster-3.11152	627.918	2.62809	3.6e-12
Cluster-3.6969	233.01	1.49457	3.6e-12	sp_Q9H6R0_DHX33_HUMAN_Putative_ATP-dependent_RNA_helicase_DHX33_OS=Homo_sapiens_OX=9606_GN=DHX33_PE=1_SV=2
Cluster-3.4937	88.7357	1.70749	3.62e-12
Cluster-5581.0	465.333	1.19428	3.62e-12
Cluster-5612.0	435.553	-2.352	3.67e-12	sp_O75363_BCAS1_HUMAN_Breast_carcinoma-amplified_sequence_1_OS=Homo_sapiens_OX=9606_GN=BCAS1_PE=1_SV=2
Cluster-3.4232	203.237	1.13059	3.7e-12
Cluster-6977.0	96.6185	-1.80606	3.95e-12	sp_P48999_LOX5_MOUSE_Arachidonate_5-lipoxygenase_OS=Mus_musculus_OX=10090_GN=Alox5_PE=1_SV=3
Cluster-9318.0	1160.6	-1.27991	3.95e-12	sp_Q6IVG4_ACAP2_RABIT_Arf-GAP_with_coiled-coil,_ANK_repeat_and_PH_domain-containing_protein_2_OS=Oryctolagus_cuniculus_OX=9986_GN=ACAP2_PE=2_SV=1
Cluster-10777.0	71.4119	-2.7698	4.06e-12	sp_P09889_PPA5_PIG_Tartrate-resistant_acid_phosphatase_type_5_OS=Sus_scrofa_OX=9823_GN=ACP5_PE=1_SV=4
Cluster-16475.0	218.867	-2.40202	4.19e-12	sp_A1L157_TSN11_HUMAN_Tetraspanin-11_OS=Homo_sapiens_OX=9606_GN=TSPAN11_PE=2_SV=2
Cluster-3.9157	599.921	-1.03835	4.23e-12	sp_Q5E9N3_RNF25_BOVIN_E3_ubiquitin-protein_ligase_RNF25_OS=Bos_taurus_OX=9913_GN=RNF25_PE=2_SV=1
Cluster-9063.0	1708.26	-1.17837	4.45e-12	sp_P63025_VAMP3_RAT_Vesicle-associated_membrane_protein_3_OS=Rattus_norvegicus_OX=10116_GN=Vamp3_PE=1_SV=1
Cluster-3.11901	3588.47	-1.0902	4.54e-12	sp_Q6P963_GLO2_DANRE_Hydroxyacylglutathione_hydrolase,_mitochondrial_OS=Danio_rerio_OX=7955_GN=hagh_PE=2_SV=2
Cluster-3.4255	343.583	1.64515	4.54e-12	sp_Q6IP59_CTL2_XENLA_Choline_transporter-like_protein_2_OS=Xenopus_laevis_OX=8355_GN=slc44a2_PE=2_SV=1
Cluster-4378.0	1007.79	-2.01203	4.54e-12	sp_Q32KX7_BMI1_BOVIN_Polycomb_complex_protein_BMI-1_OS=Bos_taurus_OX=9913_GN=BMI1_PE=2_SV=1
Cluster-3.11661	3424.56	-1.04649	4.55e-12	sp_A4FUY1_HECAM_BOVIN_Hepatocyte_cell_adhesion_molecule_OS=Bos_taurus_OX=9913_GN=HEPACAM_PE=2_SV=1
Cluster-3.11708	170.633	1.99535	4.56e-12
Cluster-12629.0	224.121	-1.94111	4.57e-12	sp_Q80UE6_WNK4_MOUSE_Serine/threonine-protein_kinase_WNK4_OS=Mus_musculus_OX=10090_GN=Wnk4_PE=1_SV=1
Cluster-3.11600	71625.5	-2.5304	4.61e-12	sp_P00341_LDHA_SQUAC_L-lactate_dehydrogenase_A_chain_OS=Squalus_acanthias_OX=7797_GN=ldha_PE=1_SV=4
Cluster-11162.0	947.327	-1.9735	4.63e-12	sp_Q6IQ20_NAPEP_HUMAN_N-acyl-phosphatidylethanolamine-hydrolyzing_phospholipase_D_OS=Homo_sapiens_OX=9606_GN=NAPEPLD_PE=1_SV=2
Cluster-3.6325	542.998	1.06676	4.72e-12	sp_Q9UIF7_MUTYH_HUMAN_Adenine_DNA_glycosylase_OS=Homo_sapiens_OX=9606_GN=MUTYH_PE=1_SV=1
Cluster-3.13094	5322.76	-1.34811	4.9e-12
Cluster-3.8192	1870.62	-1.66352	5.13e-12
Cluster-15435.0	4840.61	-1.44786	5.14e-12	sp_Q6WCQ1_MPRIP_HUMAN_Myosin_phosphatase_Rho-interacting_protein_OS=Homo_sapiens_OX=9606_GN=MPRIP_PE=1_SV=3
Cluster-3.10485	161.136	2.08809	5.18e-12
Cluster-3.12487	357.276	1.34439	5.5e-12
Cluster-7387.0	3248.25	-1.71587	5.5e-12	sp_P30825_CTR1_HUMAN_High_affinity_cationic_amino_acid_transporter_1_OS=Homo_sapiens_OX=9606_GN=SLC7A1_PE=1_SV=1
Cluster-3.13047	39236.2	-2.50224	5.52e-12	sp_Q78YZ6_SCOC_MOUSE_Short_coiled-coil_protein_OS=Mus_musculus_OX=10090_GN=Scoc_PE=1_SV=1
Cluster-3.2657	1263.02	-2.72561	5.52e-12	sp_P49907_SEPP1_BOVIN_Selenoprotein_P_OS=Bos_taurus_OX=9913_GN=SELENOP_PE=2_SV=2
Cluster-3.615	179.447	1.62356	5.72e-12	sp_Q5R5U3_ZN271_PONAB_Zinc_finger_protein_271_OS=Pongo_abelii_OX=9601_GN=ZNF271_PE=2_SV=1
Cluster-4993.1	642.081	2.6868	5.88e-12	sp_P23921_RIR1_HUMAN_Ribonucleoside-diphosphate_reductase_large_subunit_OS=Homo_sapiens_OX=9606_GN=RRM1_PE=1_SV=1
Cluster-15680.2	2827.58	1.93065	5.89e-12	sp_Q3UHR0_BAHC1_MOUSE_BAH_and_coiled-coil_domain-containing_protein_1_OS=Mus_musculus_OX=10090_GN=Bahcc1_PE=2_SV=2
Cluster-3.9870	3.75218e+06	-2.73397	5.96e-12	sp_O93459_OPSD_SCYCA_Rhodopsin_OS=Scyliorhinus_canicula_OX=7830_GN=rho_PE=2_SV=1
Cluster-12152.0	1993.18	-2.50368	6.19e-12	sp_Q6ZVW7_I17EL_HUMAN_Putative_interleukin-17_receptor_E-like_OS=Homo_sapiens_OX=9606_GN=IL17REL_PE=2_SV=2
Cluster-3.9013	192.069	-3.44817	6.28e-12
Cluster-10287.0	10207	-1.59718	6.35e-12	sp_Q9P2M4_TBC14_HUMAN_TBC1_domain_family_member_14_OS=Homo_sapiens_OX=9606_GN=TBC1D14_PE=1_SV=3
Cluster-1901.0	80.1113	-1.38203	6.75e-12
Cluster-3.5354	27403.6	-2.57371	6.8e-12	sp_Q9P241_AT10D_HUMAN_Probable_phospholipid-transporting_ATPase_VD_OS=Homo_sapiens_OX=9606_GN=ATP10D_PE=2_SV=3
Cluster-3.1877	2206.19	-1.74646	6.95e-12	sp_P28227_MAOX_ANAPL_NADP-dependent_malic_enzyme_OS=Anas_platyrhynchos_OX=8839_GN=ME1_PE=1_SV=1
Cluster-3.2821	1676.08	-1.84909	6.95e-12
Cluster-3.2977	1892.19	-3.23054	7e-12
Cluster-12765.0	215.806	-3.32196	7.03e-12	sp_Q28488_CRYM_MACFL_Ketimine_reductase_mu-crystallin_OS=Macropus_fuliginosus_OX=9316_GN=CRYM_PE=2_SV=1
Cluster-394.0	70.4364	-4.25334	7.15e-12	sp_Q8MJI6_S22A2_RABIT_Solute_carrier_family_22_member_2_OS=Oryctolagus_cuniculus_OX=9986_GN=SLC22A2_PE=1_SV=1
Cluster-7005.0	15114.5	-2.58481	7.18e-12	sp_P01210_PENK_HUMAN_Proenkephalin-A_OS=Homo_sapiens_OX=9606_GN=PENK_PE=1_SV=1
Cluster-982.0	2260.79	-1.68433	7.2e-12	sp_Q8BGQ6_EFC14_MOUSE_EF-hand_calcium-binding_domain-containing_protein_14_OS=Mus_musculus_OX=10090_GN=Efcab14_PE=2_SV=1
Cluster-9997.0	323.952	-2.23671	7.22e-12	sp_Q8CI70_LRC20_MOUSE_Leucine-rich_repeat-containing_protein_20_OS=Mus_musculus_OX=10090_GN=Lrrc20_PE=1_SV=1
Cluster-11813.0	842.778	-1.54022	7.26e-12	sp_A1A5V9_ELP5_DANRE_Elongator_complex_protein_5_OS=Danio_rerio_OX=7955_GN=elp5_PE=2_SV=1
Cluster-3.614	272.039	-2.13263	7.31e-12	sp_Q8CB19_PHTF2_MOUSE_Putative_homeodomain_transcription_factor_2_OS=Mus_musculus_OX=10090_GN=Phtf2_PE=1_SV=2
Cluster-6683.1	168.847	-2.29618	7.32e-12	sp_Q1JPJ2_XPP1_BOVIN_Xaa-Pro_aminopeptidase_1_OS=Bos_taurus_OX=9913_GN=XPNPEP1_PE=2_SV=1
Cluster-3.11519	4584.72	-2.1779	7.32e-12	sp_Q13822_ENPP2_HUMAN_Ectonucleotide_pyrophosphatase/phosphodiesterase_family_member_2_OS=Homo_sapiens_OX=9606_GN=ENPP2_PE=1_SV=3
Cluster-3.5628	133.113	-2.35123	7.37e-12	sp_A2T777_HESX1_PANTR_Homeobox_expressed_in_ES_cells_1_OS=Pan_troglodytes_OX=9598_GN=HESX1_PE=3_SV=1
Cluster-318.0	1846.4	-2.55486	7.37e-12	sp_Q9PUU8_CNMD_CHICK_Leukocyte_cell-derived_chemotaxin_1_OS=Gallus_gallus_OX=9031_GN=CNMD_PE=2_SV=1
Cluster-5104.0	2548.82	-2.58377	7.71e-12	sp_Q96CM4_NXNL1_HUMAN_Nucleoredoxin-like_protein_1_OS=Homo_sapiens_OX=9606_GN=NXNL1_PE=2_SV=1
Cluster-3.10167	2898.96	-2.30058	8.62e-12	sp_Q9D6R2_IDH3A_MOUSE_Isocitrate_dehydrogenase_[NAD]_subunit_alpha,_mitochondrial_OS=Mus_musculus_OX=10090_GN=Idh3a_PE=1_SV=1
Cluster-3.7117	71.8218	2.12179	8.82e-12	sp_Q9BSJ6_PIMRE_HUMAN_Protein_PIMREG_OS=Homo_sapiens_OX=9606_GN=PIMREG_PE=1_SV=1
Cluster-14662.0	187.305	-1.72108	8.86e-12	sp_Q62371_DDR2_MOUSE_Discoidin_domain-containing_receptor_2_OS=Mus_musculus_OX=10090_GN=Ddr2_PE=1_SV=2
Cluster-375.0	361.657	2.54394	9.42e-12	sp_Q14739_LBR_HUMAN_Lamin-B_receptor_OS=Homo_sapiens_OX=9606_GN=LBR_PE=1_SV=2
Cluster-3.8308	142.921	1.93786	9.92e-12
Cluster-3.7430	1810.79	-1.90015	9.94e-12
Cluster-9959.0	309.416	1.32263	9.94e-12	sp_Q99MK9_RASF1_MOUSE_Ras_association_domain-containing_protein_1_OS=Mus_musculus_OX=10090_GN=Rassf1_PE=2_SV=1
Cluster-10550.1	608.28	-2.41422	1.01e-11	sp_Q5I0K7_ALG13_RAT_UDP-N-acetylglucosamine_transferase_subunit_ALG13_homolog_OS=Rattus_norvegicus_OX=10116_GN=Alg13_PE=1_SV=1
Cluster-9166.0	61.4685	-3.28908	1.01e-11	sp_P33262_CP2CK_MACFA_Cytochrome_P450_2C20_OS=Macaca_fascicularis_OX=9541_GN=CYP2C20_PE=2_SV=1
Cluster-5116.0	268.236	-2.82999	1.01e-11
Cluster-3.9047	199.612	1.212	1.05e-11
Cluster-3.7328	251.52	1.08225	1.07e-11
Cluster-2239.0	3387.4	-1.69089	1.07e-11	sp_P79774_SNAT_CHICK_Serotonin_N-acetyltransferase_OS=Gallus_gallus_OX=9031_GN=AANAT_PE=2_SV=1
Cluster-12356.0	53.9137	2.15035	1.08e-11
Cluster-9745.0	97.9283	1.62436	1.09e-11
Cluster-3.5109	579.935	-1.59495	1.09e-11
Cluster-4291.0	2603.62	1.64667	1.12e-11
Cluster-2304.0	678.745	-3.0891	1.12e-11	sp_Q504Y0_S39AC_HUMAN_Zinc_transporter_ZIP12_OS=Homo_sapiens_OX=9606_GN=SLC39A12_PE=2_SV=3
Cluster-3.1778	336.404	-1.08373	1.13e-11	sp_Q8VEH6_CBWD1_MOUSE_COBW_domain-containing_protein_1_OS=Mus_musculus_OX=10090_GN=Cbwd1_PE=1_SV=1
Cluster-3.2879	776.815	1.24898	1.16e-11
Cluster-4040.0	534.612	1.83606	1.17e-11
Cluster-3.1259	715.317	1.3363	1.18e-11	sp_Q0P5N6_ARL16_HUMAN_ADP-ribosylation_factor-like_protein_16_OS=Homo_sapiens_OX=9606_GN=ARL16_PE=1_SV=1
Cluster-3.9648	446.632	2.28314	1.18e-11
Cluster-11317.0	453.396	-3.94445	1.2e-11	sp_P14437_HA2S_MOUSE_H-2_class_II_histocompatibility_antigen,_A-S_alpha_chain_OS=Mus_musculus_OX=10090_GN=H2-Aa_PE=1_SV=1
Cluster-174.0	2423.05	-1.08086	1.27e-11	sp_P26008_ITAV_CHICK_Integrin_alpha-V_OS=Gallus_gallus_OX=9031_GN=ITGAV_PE=2_SV=1
Cluster-12295.0	161.761	-1.78991	1.29e-11
Cluster-7403.0	4841.77	-2.73577	1.29e-11	sp_D4A612_ELOV2_RAT_Elongation_of_very_long_chain_fatty_acids_protein_2_OS=Rattus_norvegicus_OX=10116_GN=Elovl2_PE=1_SV=1
Cluster-3.11062	66.8365	2.0836	1.29e-11
Cluster-14403.2	66.5927	-2.09872	1.32e-11	sp_Q8TB24_RIN3_HUMAN_Ras_and_Rab_interactor_3_OS=Homo_sapiens_OX=9606_GN=RIN3_PE=1_SV=4
Cluster-3.170	3556.12	-2.55877	1.33e-11	sp_Q9NV31_IMP3_HUMAN_U3_small_nucleolar_ribonucleoprotein_protein_IMP3_OS=Homo_sapiens_OX=9606_GN=IMP3_PE=1_SV=1
Cluster-8759.0	7094.26	-1.42114	1.35e-11	sp_O96005_CLPT1_HUMAN_Cleft_lip_and_palate_transmembrane_protein_1_OS=Homo_sapiens_OX=9606_GN=CLPTM1_PE=1_SV=1
Cluster-3.9074	115.325	1.86389	1.35e-11
Cluster-10033.0	140.156	1.44297	1.36e-11	sp_Q61321_SIX4_MOUSE_Homeobox_protein_SIX4_OS=Mus_musculus_OX=10090_GN=Six4_PE=1_SV=1
Cluster-11990.0	75509.4	-2.77325	1.42e-11	sp_P08267_FRIH_CHICK_Ferritin_heavy_chain_OS=Gallus_gallus_OX=9031_GN=FTH_PE=2_SV=2
Cluster-12919.1	59.0142	-1.84848	1.42e-11	sp_Q2IBG7_MET_EULMM_Hepatocyte_growth_factor_receptor_OS=Eulemur_macaco_macaco_OX=30603_GN=MET_PE=3_SV=1
Cluster-2165.0	506366	-2.99018	1.46e-11	sp_P02698_GBG1_BOVIN_Guanine_nucleotide-binding_protein_G(T)_subunit_gamma-T1_OS=Bos_taurus_OX=9913_GN=GNGT1_PE=1_SV=2
Cluster-307.0	762.194	-1.62778	1.47e-11	sp_Q9Y6N9_USH1C_HUMAN_Harmonin_OS=Homo_sapiens_OX=9606_GN=USH1C_PE=1_SV=3
Cluster-3344.0	67.212	1.59648	1.52e-11
Cluster-3.1166	19155.2	-3.44629	1.62e-11
Cluster-13202.0	659.828	-1.67895	1.63e-11	sp_O35680_RT12_MOUSE_28S_ribosomal_protein_S12,_mitochondrial_OS=Mus_musculus_OX=10090_GN=Mrps12_PE=2_SV=1
Cluster-5631.2	518.141	-2.19052	1.67e-11
Cluster-9457.0	367.434	1.27106	1.69e-11
Cluster-3.2343	266.017	-1.30384	1.73e-11	sp_P49746_TSP3_HUMAN_Thrombospondin-3_OS=Homo_sapiens_OX=9606_GN=THBS3_PE=1_SV=1
Cluster-3.11143	179.37	1.65907	1.76e-11
Cluster-3.4253	28962	-2.67951	1.78e-11	sp_P10123_RLBP1_BOVIN_Retinaldehyde-binding_protein_1_OS=Bos_taurus_OX=9913_GN=RLBP1_PE=1_SV=4
Cluster-1594.0	775.271	-1.92319	1.79e-11	sp_P70665_SIAE_MOUSE_Sialate_O-acetylesterase_OS=Mus_musculus_OX=10090_GN=Siae_PE=1_SV=3
Cluster-3.5472	84.0547	1.73262	1.8e-11
Cluster-3801.0	378.998	1.84005	1.82e-11
Cluster-13014.0	461.478	-2.80004	1.85e-11	sp_Q2T9K0_TMM44_HUMAN_Transmembrane_protein_44_OS=Homo_sapiens_OX=9606_GN=TMEM44_PE=1_SV=3
Cluster-3720.1	9708.3	-1.60035	1.95e-11	sp_Q9UEY8_ADDG_HUMAN_Gamma-adducin_OS=Homo_sapiens_OX=9606_GN=ADD3_PE=1_SV=1
Cluster-13495.2	776.416	-1.61863	1.96e-11	sp_Q6PFP6_NDOR1_DANRE_NADPH-dependent_diflavin_oxidoreductase_1_OS=Danio_rerio_OX=7955_GN=ndor1_PE=2_SV=1
Cluster-3.9777	89.7565	1.86926	1.96e-11	sp_P08548_LIN1_NYCCO_LINE-1_reverse_transcriptase_homolog_OS=Nycticebus_coucang_OX=9470_PE=3_SV=1
Cluster-10597.0	1618.52	-2.4331	1.96e-11	sp_Q921W4_QORL1_MOUSE_Quinone_oxidoreductase-like_protein_1_OS=Mus_musculus_OX=10090_GN=Cryzl1_PE=1_SV=1
Cluster-2082.0	671.634	-1.76886	2e-11
Cluster-3.8353	2515.24	-1.68207	2e-11	sp_Q91WB4_PKHF2_MOUSE_Pleckstrin_homology_domain-containing_family_F_member_2_OS=Mus_musculus_OX=10090_GN=Plekhf2_PE=1_SV=1
Cluster-8380.0	727.958	-3.08174	2e-11	sp_P55208_ANFC_TRISC_C-type_natriuretic_peptide_prohormone_OS=Triakis_scyllium_OX=30494_PE=1_SV=2
Cluster-9917.0	1142.58	-3.1094	2.05e-11	sp_Q63639_AL1A2_RAT_Retinal_dehydrogenase_2_OS=Rattus_norvegicus_OX=10116_GN=Aldh1a2_PE=1_SV=2
Cluster-3.2946	1222.19	-1.1472	2.06e-11	sp_Q96RS6_NUDC1_HUMAN_NudC_domain-containing_protein_1_OS=Homo_sapiens_OX=9606_GN=NUDCD1_PE=1_SV=2
Cluster-13259.1	7275.69	-1.22807	2.07e-11	sp_Q5F362_CC50A_CHICK_Cell_cycle_control_protein_50A_OS=Gallus_gallus_OX=9031_GN=TMEM30A_PE=2_SV=1
Cluster-3.6828	274.593	1.65362	2.07e-11	sp_P11369_LORF2_MOUSE_LINE-1_retrotransposable_element_ORF2_protein_OS=Mus_musculus_OX=10090_GN=Pol_PE=1_SV=2
Cluster-11403.1	3785.28	-1.94913	2.09e-11	sp_Q8BGF6_ELMD2_MOUSE_ELMO_domain-containing_protein_2_OS=Mus_musculus_OX=10090_GN=Elmod2_PE=1_SV=1
Cluster-11537.0	153.97	-2.17847	2.09e-11
Cluster-2546.0	1882.03	-2.25988	2.12e-11	sp_O43741_AAKB2_HUMAN_5'-AMP-activated_protein_kinase_subunit_beta-2_OS=Homo_sapiens_OX=9606_GN=PRKAB2_PE=1_SV=1
Cluster-4730.0	401.597	-2.55671	2.17e-11	sp_Q9Z0F4_CIB1_MOUSE_Calcium_and_integrin-binding_protein_1_OS=Mus_musculus_OX=10090_GN=Cib1_PE=1_SV=3
Cluster-4995.0	190.355	-2.32173	2.17e-11
Cluster-10455.0	905.774	1.21206	2.34e-11	sp_Q8C0R0_UBP37_MOUSE_Ubiquitin_carboxyl-terminal_hydrolase_37_OS=Mus_musculus_OX=10090_GN=Usp37_PE=1_SV=1
Cluster-3.8651	148.042	-1.55982	2.34e-11	sp_Q6NX49_ZN544_HUMAN_Zinc_finger_protein_544_OS=Homo_sapiens_OX=9606_GN=ZNF544_PE=1_SV=1
Cluster-4057.0	1719.91	1.24473	2.34e-11	sp_P40145_ADCY8_HUMAN_Adenylate_cyclase_type_8_OS=Homo_sapiens_OX=9606_GN=ADCY8_PE=1_SV=1
Cluster-13732.0	2476.13	-1.54069	2.37e-11	sp_Q91653_CRHBP_XENLA_Corticotropin-releasing_factor-binding_protein_OS=Xenopus_laevis_OX=8355_GN=crhbp_PE=2_SV=1
Cluster-9902.0	778.09	1.25196	2.38e-11
Cluster-3.4927	253.483	1.41132	2.39e-11	sp_A2VDA9_CAVN4_XENLA_Caveolae-associated_protein_4_OS=Xenopus_laevis_OX=8355_GN=cavin4_PE=2_SV=1
Cluster-6129.0	111.647	-3.33221	2.46e-11	sp_Q14D04_MELT_HUMAN_Ventricular_zone-expressed_PH_domain-containing_protein_homolog_1_OS=Homo_sapiens_OX=9606_GN=VEPH1_PE=1_SV=1
Cluster-15554.0	8915.04	-3.00636	2.47e-11	sp_P05943_S10AA_RAT_Protein_S100-A10_OS=Rattus_norvegicus_OX=10116_GN=S100a10_PE=1_SV=2
Cluster-3.11016	12656.4	-1.01862	2.54e-11	sp_Q8TCB7_METL6_HUMAN_Methyltransferase-like_protein_6_OS=Homo_sapiens_OX=9606_GN=METTL6_PE=2_SV=2
Cluster-7978.0	1856.2	-1.31629	2.59e-11	sp_Q62186_SSRD_MOUSE_Translocon-associated_protein_subunit_delta_OS=Mus_musculus_OX=10090_GN=Ssr4_PE=1_SV=1
Cluster-9654.0	129.498	2.30636	2.62e-11	sp_Q02241_KIF23_HUMAN_Kinesin-like_protein_KIF23_OS=Homo_sapiens_OX=9606_GN=KIF23_PE=1_SV=3
Cluster-3.3030	499.073	-2.9891	2.64e-11	sp_Q5R833_ACO13_PONAB_Acyl-coenzyme_A_thioesterase_13_OS=Pongo_abelii_OX=9601_GN=ACOT13_PE=2_SV=1
Cluster-15167.0	762.381	-2.53684	2.67e-11	sp_P04228_HA2D_MOUSE_H-2_class_II_histocompatibility_antigen,_A-D_alpha_chain_OS=Mus_musculus_OX=10090_GN=H2-Aa_PE=1_SV=1
Cluster-3.4651	133.306	-2.18959	2.67e-11	sp_A1L2F6_TM205_DANRE_Transmembrane_protein_205_OS=Danio_rerio_OX=7955_GN=tmem205_PE=2_SV=1
Cluster-14154.0	283.251	1.85294	2.68e-11
Cluster-1391.0	106.726	-2.00919	2.72e-11	sp_Q6DCV1_AB1IP_XENLA_Amyloid_beta_A4_precursor_protein-binding_family_B_member_1-interacting_protein_OS=Xenopus_laevis_OX=8355_GN=apbb1ip_PE=2_SV=2
Cluster-10795.1	1201.27	-1.80346	2.78e-11	sp_Q9H8M1_CQ10B_HUMAN_Coenzyme_Q-binding_protein_COQ10_homolog_B,_mitochondrial_OS=Homo_sapiens_OX=9606_GN=COQ10B_PE=2_SV=1
Cluster-3.12719	1116.06	-2.19676	2.84e-11	sp_O70352_CD82_RAT_CD82_antigen_OS=Rattus_norvegicus_OX=10116_GN=Cd82_PE=1_SV=1
Cluster-3.1355	2.89785e+06	-2.68262	2.84e-11	sp_O79411_NU5M_SCYCA_NADH-ubiquinone_oxidoreductase_chain_5_OS=Scyliorhinus_canicula_OX=7830_GN=MT-ND5_PE=3_SV=1
Cluster-13785.0	1374.43	1.43687	2.86e-11
Cluster-3.3892	182.303	-2.00242	2.86e-11	sp_P33241_LSP1_HUMAN_Lymphocyte-specific_protein_1_OS=Homo_sapiens_OX=9606_GN=LSP1_PE=1_SV=1
Cluster-9527.0	186.304	-3.78933	2.86e-11	sp_P04186_CFAB_MOUSE_Complement_factor_B_OS=Mus_musculus_OX=10090_GN=Cfb_PE=1_SV=2
Cluster-6352.1	824.819	-1.07699	2.98e-11	sp_O75817_POP7_HUMAN_Ribonuclease_P_protein_subunit_p20_OS=Homo_sapiens_OX=9606_GN=POP7_PE=1_SV=2
Cluster-10363.0	728.319	-1.66416	3.05e-11	sp_O35878_HSPB2_RAT_Heat_shock_protein_beta-2_OS=Rattus_norvegicus_OX=10116_GN=Hspb2_PE=3_SV=1
Cluster-3.12457	510.455	-1.21801	3.05e-11	sp_Q9P2J8_ZN624_HUMAN_Zinc_finger_protein_624_OS=Homo_sapiens_OX=9606_GN=ZNF624_PE=1_SV=3
Cluster-10545.0	563.986	-1.92922	3.08e-11	sp_Q5M9N0_CD158_HUMAN_Coiled-coil_domain-containing_protein_158_OS=Homo_sapiens_OX=9606_GN=CCDC158_PE=2_SV=2
Cluster-3.930	260.453	1.28756	3.15e-11	sp_P11369_LORF2_MOUSE_LINE-1_retrotransposable_element_ORF2_protein_OS=Mus_musculus_OX=10090_GN=Pol_PE=1_SV=2
Cluster-7839.0	1424.49	-1.77209	3.2e-11	sp_Q9BTV4_TMM43_HUMAN_Transmembrane_protein_43_OS=Homo_sapiens_OX=9606_GN=TMEM43_PE=1_SV=1
Cluster-3.746	4444.46	-1.66679	3.26e-11	sp_Q08E66_WFKN2_BOVIN_WAP,_Kazal,_immunoglobulin,_Kunitz_and_NTR_domain-containing_protein_2_OS=Bos_taurus_OX=9913_GN=WFIKKN2_PE=2_SV=1
Cluster-159.0	384.51	2.29889	3.33e-11
Cluster-3.8281	4627.51	-1.56812	3.33e-11	sp_P98191_CDS1_MOUSE_Phosphatidate_cytidylyltransferase_1_OS=Mus_musculus_OX=10090_GN=Cds1_PE=1_SV=2
Cluster-3.9256	919.973	-1.82291	3.41e-11
Cluster-10014.0	184.645	-3.3288	3.47e-11	sp_Q3KNI6_PIHD3_MOUSE_Protein_PIH1D3_OS=Mus_musculus_OX=10090_GN=Pih1d3_PE=1_SV=1
Cluster-1354.0	113.181	-2.13181	3.51e-11
Cluster-15229.0	1683.73	-2.22727	3.59e-11	sp_Q5ZMC3_WSDU1_CHICK_WD_repeat,_SAM_and_U-box_domain-containing_protein_1_OS=Gallus_gallus_OX=9031_GN=WDSUB1_PE=2_SV=2
Cluster-3.11009	1267.37	-2.64063	3.63e-11	sp_Q9UJW8_ZN180_HUMAN_Zinc_finger_protein_180_OS=Homo_sapiens_OX=9606_GN=ZNF180_PE=1_SV=2
Cluster-1861.3	92.9594	1.73473	3.73e-11	sp_Q12837_PO4F2_HUMAN_POU_domain,_class_4,_transcription_factor_2_OS=Homo_sapiens_OX=9606_GN=POU4F2_PE=1_SV=2
Cluster-3.2564	520.463	1.56563	3.73e-11
Cluster-11005.0	39329	-2.65908	3.81e-11	sp_Q9D531_NXNL2_MOUSE_Nucleoredoxin-like_protein_2_OS=Mus_musculus_OX=10090_GN=Nxnl2_PE=1_SV=1
Cluster-3.10600	86.4209	1.4346	3.82e-11
Cluster-3.11355	180.031	-2.9923	3.86e-11	sp_P62972_UBIQP_XENLA_Polyubiquitin_(Fragment)_OS=Xenopus_laevis_OX=8355_PE=1_SV=2
Cluster-8764.0	87.9987	-2.36378	3.93e-11	sp_Q9WUF4_VAMP8_RAT_Vesicle-associated_membrane_protein_8_OS=Rattus_norvegicus_OX=10116_GN=Vamp8_PE=1_SV=1
Cluster-3.11150	616.83	1.13091	3.96e-11
Cluster-16303.0	3307.27	-2.35395	3.98e-11	sp_B0BLZ5_THEM6_XENTR_Protein_THEM6_OS=Xenopus_tropicalis_OX=8364_GN=them6_PE=2_SV=1
Cluster-3.11943	3212.68	1.50027	4.01e-11	sp_Q5ZLC6_ANR10_CHICK_Ankyrin_repeat_domain-containing_protein_10_OS=Gallus_gallus_OX=9031_GN=ANKRD10_PE=2_SV=1
Cluster-3.4727	18378.8	-2.74167	4.06e-11	sp_P11501_HS90A_CHICK_Heat_shock_protein_HSP_90-alpha_OS=Gallus_gallus_OX=9031_GN=HSP90AA1_PE=3_SV=3
Cluster-14786.0	8568.83	-2.35251	4.07e-11	sp_P33716_CMGA_STRCA_Chromogranin-A_(Fragments)_OS=Struthio_camelus_OX=8801_GN=CHGA_PE=1_SV=2
Cluster-9428.0	299.283	-2.45145	4.08e-11	sp_Q91197_MX3_ONCMY_Interferon-induced_GTP-binding_protein_Mx3_OS=Oncorhynchus_mykiss_OX=8022_GN=mx3_PE=2_SV=1
Cluster-10599.1	227.89	1.6728	4.08e-11
Cluster-3.6766	2143.66	1.27328	4.29e-11
Cluster-3.3891	405.872	-2.64293	4.29e-11	sp_P36510_UD2A1_RAT_UDP-glucuronosyltransferase_2A1_OS=Rattus_norvegicus_OX=10116_GN=Ugt2a1_PE=2_SV=1
Cluster-14758.1	917.541	-1.93634	4.3e-11	sp_Q5R570_ORML3_PONAB_ORM1-like_protein_3_OS=Pongo_abelii_OX=9601_GN=ORMDL3_PE=2_SV=1
Cluster-13152.0	30008.3	-1.81964	4.33e-11	sp_Q67FY2_BCL9L_MOUSE_B-cell_CLL/lymphoma_9-like_protein_OS=Mus_musculus_OX=10090_GN=Bcl9l_PE=1_SV=1
Cluster-3.9558	160.178	1.48691	4.33e-11
Cluster-4705.1	392.326	-1.81672	4.35e-11	sp_Q5ZJQ8_UBAC2_CHICK_Ubiquitin-associated_domain-containing_protein_2_OS=Gallus_gallus_OX=9031_GN=UBAC2_PE=2_SV=1
Cluster-3.13205	1328.4	-1.30891	4.38e-11	sp_Q5RBD6_CCD66_PONAB_Coiled-coil_domain-containing_protein_66_OS=Pongo_abelii_OX=9601_GN=CCDC66_PE=2_SV=1
Cluster-714.0	1059.06	-2.41581	4.49e-11	sp_Q8R143_PTTG_MOUSE_Pituitary_tumor-transforming_gene_1_protein-interacting_protein_OS=Mus_musculus_OX=10090_GN=Pttg1ip_PE=1_SV=1
Cluster-16418.0	3482	-1.60298	4.49e-11	sp_Q5PQP4_BORG1_RAT_Cdc42_effector_protein_2_OS=Rattus_norvegicus_OX=10116_GN=Cdc42ep2_PE=1_SV=1
Cluster-3.10877	501.223	-1.3788	4.49e-11
Cluster-12329.0	2759.84	-2.02467	4.52e-11	sp_Q5R6R7_SEPT4_PONAB_Septin-4_OS=Pongo_abelii_OX=9601_GN=SEPT4_PE=2_SV=1
Cluster-3.2506	11574	-1.49206	4.55e-11	sp_Q9W6F8_WIF1_XENLA_Wnt_inhibitory_factor_1_OS=Xenopus_laevis_OX=8355_GN=wif1_PE=2_SV=1
Cluster-1346.0	9205.53	-2.26981	4.59e-11	sp_O93428_CATD_CHIHA_Cathepsin_D_OS=Chionodraco_hamatus_OX=36188_GN=ctsd_PE=1_SV=2
Cluster-3.6902	87.0912	1.63948	4.59e-11
Cluster-4526.0	14245.4	-1.79961	4.78e-11	sp_P41732_TSN7_HUMAN_Tetraspanin-7_OS=Homo_sapiens_OX=9606_GN=TSPAN7_PE=1_SV=2
Cluster-2425.0	185.072	-2.19534	4.8e-11	sp_Q8VHW1_CCGL_RAT_Voltage-dependent_calcium_channel_gamma-like_subunit_OS=Rattus_norvegicus_OX=10116_GN=Tmem37_PE=2_SV=1
Cluster-15599.0	54.2414	-1.82487	4.88e-11
Cluster-1128.0	475.129	2.50425	4.95e-11
Cluster-3.10016	87.2346	-2.58386	4.96e-11	sp_Q9H7C9_AAMDC_HUMAN_Mth938_domain-containing_protein_OS=Homo_sapiens_OX=9606_GN=AAMDC_PE=1_SV=1
Cluster-3.5171	658.744	-2.38582	4.96e-11
Cluster-3.6611	6775.6	-2.14734	4.96e-11	sp_P18067_RAB7A_CANLF_Ras-related_protein_Rab-7a_OS=Canis_lupus_familiaris_OX=9615_GN=RAB7A_PE=1_SV=1
Cluster-10109.0	182.586	2.50654	5.06e-11	sp_Q91785_KI15A_XENLA_Kinesin-like_protein_KIF15-A_OS=Xenopus_laevis_OX=8355_GN=kif15-a_PE=1_SV=1
Cluster-10518.0	419.262	-1.69842	5.22e-11	sp_Q9NWM8_FKB14_HUMAN_Peptidyl-prolyl_cis-trans_isomerase_FKBP14_OS=Homo_sapiens_OX=9606_GN=FKBP14_PE=1_SV=1
Cluster-3.9196	59.2659	1.92385	5.41e-11	sp_Q17QR8_HARB1_BOVIN_Putative_nuclease_HARBI1_OS=Bos_taurus_OX=9913_GN=HARBI1_PE=2_SV=1
Cluster-3.500	902.917	-2.68135	5.46e-11	sp_Q86UD3_MARH3_HUMAN_E3_ubiquitin-protein_ligase_MARCH3_OS=Homo_sapiens_OX=9606_GN=MARCH3_PE=1_SV=1
Cluster-9118.0	114.943	-2.51322	5.61e-11	sp_Q9HD15_SRA1_HUMAN_Steroid_receptor_RNA_activator_1_OS=Homo_sapiens_OX=9606_GN=SRA1_PE=1_SV=1
Cluster-3.2662	849.579	1.83382	5.64e-11	sp_Q4R6P1_F200A_MACFA_Protein_FAM200A_OS=Macaca_fascicularis_OX=9541_GN=FAM200A_PE=2_SV=1
Cluster-3.559	1118.94	-1.30197	5.64e-11
Cluster-5585.0	1525.36	-2.08793	5.71e-11	sp_H9D1R1_TXD12_EPICO_Thioredoxin_domain-containing_protein_12_OS=Epinephelus_coioides_OX=94232_GN=Txndc12_PE=1_SV=1
Cluster-3.4626	4081.23	-1.96558	5.72e-11
Cluster-13756.1	552.403	-1.81915	5.76e-11
Cluster-14879.0	53.0839	2.03561	5.81e-11
Cluster-8643.0	1221.31	-1.56486	5.81e-11	sp_O94955_RHBT3_HUMAN_Rho-related_BTB_domain-containing_protein_3_OS=Homo_sapiens_OX=9606_GN=RHOBTB3_PE=1_SV=2
Cluster-2907.1	92.0536	2.28733	5.83e-11	sp_Q61555_FBN2_MOUSE_Fibrillin-2_OS=Mus_musculus_OX=10090_GN=Fbn2_PE=1_SV=2
Cluster-11282.0	858.514	-2.44645	5.99e-11	sp_A2ADZ8_IQCC_MOUSE_IQ_domain-containing_protein_C_OS=Mus_musculus_OX=10090_GN=Iqcc_PE=2_SV=1
Cluster-13859.0	836.294	-2.13804	5.99e-11	sp_Q9NZH0_GPC5B_HUMAN_G-protein_coupled_receptor_family_C_group_5_member_B_OS=Homo_sapiens_OX=9606_GN=GPRC5B_PE=2_SV=2
Cluster-620.0	81.6191	-2.67769	6.09e-11
Cluster-3.5029	199.777	1.97154	6.17e-11	sp_Q589G5_PRTG_CHICK_Protogenin_OS=Gallus_gallus_OX=9031_GN=PRTG_PE=2_SV=1
Cluster-8774.0	1976.4	-1.5466	6.22e-11	sp_Q6P036_S2533_DANRE_Solute_carrier_family_25_member_33_OS=Danio_rerio_OX=7955_GN=slc25a33_PE=2_SV=1
Cluster-925.1	3880.01	-2.71111	6.22e-11	sp_Q9YI05_LDHB_SQUAC_L-lactate_dehydrogenase_B_chain_OS=Squalus_acanthias_OX=7797_GN=ldhb_PE=2_SV=1
Cluster-3.4571	93.2894	1.253	6.23e-11
Cluster-10511.0	255.965	1.04267	6.27e-11	sp_Q9EPW2_KLF15_MOUSE_Krueppel-like_factor_15_OS=Mus_musculus_OX=10090_GN=Klf15_PE=1_SV=1
Cluster-3.5793	646.683	-2.12257	6.33e-11	sp_Q9DCM0_ETHE1_MOUSE_Persulfide_dioxygenase_ETHE1,_mitochondrial_OS=Mus_musculus_OX=10090_GN=Ethe1_PE=1_SV=2
Cluster-12673.0	184.845	-1.09363	6.38e-11	sp_O95800_GPR75_HUMAN_Probable_G-protein_coupled_receptor_75_OS=Homo_sapiens_OX=9606_GN=GPR75_PE=1_SV=1
Cluster-8398.1	642.705	-2.15228	6.41e-11	sp_A1L2K1_METRL_XENLA_Meteorin-like_protein_OS=Xenopus_laevis_OX=8355_GN=metrnl_PE=2_SV=1
Cluster-3.5844	3271.6	-1.7723	6.65e-11
Cluster-3.11588	4561.41	1.59917	6.71e-11
Cluster-4995.1	2114.77	-1.95261	6.73e-11
Cluster-3.4746	337.727	2.04913	6.79e-11
Cluster-14004.1	6174.1	-1.52014	6.84e-11	sp_O95573_ACSL3_HUMAN_Long-chain-fatty-acid--CoA_ligase_3_OS=Homo_sapiens_OX=9606_GN=ACSL3_PE=1_SV=3
Cluster-3.5044	2942.75	-2.14799	6.84e-11	sp_P48738_PIPNA_RABIT_Phosphatidylinositol_transfer_protein_alpha_isoform_OS=Oryctolagus_cuniculus_OX=9986_GN=PITPNA_PE=3_SV=2
Cluster-3.5586	3062.58	-2.16396	6.84e-11	sp_Q64373_B2CL1_MOUSE_Bcl-2-like_protein_1_OS=Mus_musculus_OX=10090_GN=Bcl2l1_PE=1_SV=1
Cluster-8582.0	261.105	1.09125	6.84e-11	sp_Q5R1S9_CAF1B_CHICK_Chromatin_assembly_factor_1_subunit_B_OS=Gallus_gallus_OX=9031_GN=CHAF1B_PE=1_SV=1
Cluster-3.3941	633.244	2.11564	6.86e-11
Cluster-10935.0	255.987	1.32416	6.9e-11
Cluster-12899.0	768.575	1.36336	6.93e-11
Cluster-3.2100	18698.1	-1.18817	7.03e-11
Cluster-4465.1	282.971	1.61332	7.03e-11
Cluster-3.6275	4011.06	-1.04894	7.05e-11	sp_Q9YGL6_PALM_CHICK_Paralemmin-1_OS=Gallus_gallus_OX=9031_GN=PALM_PE=1_SV=1
Cluster-3.2477	626.988	-1.99716	7.11e-11	sp_Q5CB03_B3GA1_CANLF_Galactosylgalactosylxylosylprotein_3-beta-glucuronosyltransferase_1_OS=Canis_lupus_familiaris_OX=9615_GN=B3GAT1_PE=2_SV=1
Cluster-7870.0	1086.53	-1.26117	7.2e-11	sp_P17706_PTN2_HUMAN_Tyrosine-protein_phosphatase_non-receptor_type_2_OS=Homo_sapiens_OX=9606_GN=PTPN2_PE=1_SV=2
Cluster-9968.1	3160.68	-2.38916	7.36e-11	sp_Q5XIT1_MARE3_RAT_Microtubule-associated_protein_RP/EB_family_member_3_OS=Rattus_norvegicus_OX=10116_GN=Mapre3_PE=1_SV=1
Cluster-6674.0	1462.01	-2.38496	7.38e-11	sp_Q3SZA2_FMC1_BOVIN_Protein_FMC1_homolog_OS=Bos_taurus_OX=9913_GN=FMC1_PE=3_SV=1
Cluster-10295.0	1601.05	-1.89699	7.41e-11	sp_Q6AZD1_T179A_DANRE_Transmembrane_protein_179_OS=Danio_rerio_OX=7955_GN=tmem179_PE=2_SV=1
Cluster-3.7936	198.467	1.16992	7.41e-11
Cluster-3.13242	191.475	1.34209	7.42e-11
Cluster-3.487	252.603	-2.43322	7.7e-11	sp_Q8N3C7_CLIP4_HUMAN_CAP-Gly_domain-containing_linker_protein_4_OS=Homo_sapiens_OX=9606_GN=CLIP4_PE=1_SV=1
Cluster-5544.0	773.12	-1.76691	7.7e-11	sp_B2GUY0_MA1B1_RAT_Endoplasmic_reticulum_mannosyl-oligosaccharide_1,2-alpha-mannosidase_OS=Rattus_norvegicus_OX=10116_GN=Man1b1_PE=2_SV=2
Cluster-3.2087	535.1	1.20409	7.77e-11
Cluster-6824.0	19051.7	-2.14794	7.96e-11	sp_Q8IY84_NIM1_HUMAN_Serine/threonine-protein_kinase_NIM1_OS=Homo_sapiens_OX=9606_GN=NIM1K_PE=1_SV=1
Cluster-14030.0	1833.36	-2.70213	8.04e-11
Cluster-16412.0	221.394	-2.24108	8.38e-11	sp_Q28C98_MESH1_XENTR_Guanosine-3',5'-bis(diphosphate)_3'-pyrophosphohydrolase_MESH1_OS=Xenopus_tropicalis_OX=8364_GN=hddc3_PE=2_SV=1
Cluster-3.1491	356.556	1.52042	8.38e-11	sp_A0AUT1_TCHP_XENLA_Trichoplein_keratin_filament-binding_protein_OS=Xenopus_laevis_OX=8355_GN=tchp_PE=2_SV=1
Cluster-3.7325	194.216	1.53187	8.46e-11	sp_P08548_LIN1_NYCCO_LINE-1_reverse_transcriptase_homolog_OS=Nycticebus_coucang_OX=9470_PE=3_SV=1
Cluster-4741.0	212.698	3.07543	8.59e-11	sp_Q5BKG8_NUSAP_XENTR_Nucleolar_and_spindle-associated_protein_1_OS=Xenopus_tropicalis_OX=8364_GN=nusap1_PE=2_SV=2
Cluster-3.11641	169.172	1.52615	8.61e-11	sp_P11369_LORF2_MOUSE_LINE-1_retrotransposable_element_ORF2_protein_OS=Mus_musculus_OX=10090_GN=Pol_PE=1_SV=2
Cluster-16457.0	1089.89	-1.32803	8.64e-11	sp_A4K526_TM256_BUFGR_Transmembrane_protein_256_homolog_OS=Bufo_gargarizans_OX=30331_PE=3_SV=1
Cluster-9441.0	1204.18	-2.04352	8.78e-11	sp_Q5R7L3_RM16_PONAB_39S_ribosomal_protein_L16,_mitochondrial_OS=Pongo_abelii_OX=9601_GN=MRPL16_PE=2_SV=1
Cluster-12000.0	134.204	-1.27938	8.79e-11	sp_Q8JHF2_LFNG_DANRE_Beta-1,3-N-acetylglucosaminyltransferase_lunatic_fringe_OS=Danio_rerio_OX=7955_GN=lfng_PE=2_SV=2
Cluster-6243.0	60.1	-2.59282	8.86e-11	sp_A3KNK1_T120A_DANRE_Transmembrane_protein_120A_OS=Danio_rerio_OX=7955_GN=tmem120a_PE=2_SV=1
Cluster-14471.0	3764.29	-1.16291	8.98e-11	sp_Q96A54_PAQR1_HUMAN_Adiponectin_receptor_protein_1_OS=Homo_sapiens_OX=9606_GN=ADIPOR1_PE=1_SV=1
Cluster-8961.0	4379.64	-1.56807	9.17e-11
Cluster-3.3810	679.724	-1.15211	9.27e-11	sp_P42224_STAT1_HUMAN_Signal_transducer_and_activator_of_transcription_1-alpha/beta_OS=Homo_sapiens_OX=9606_GN=STAT1_PE=1_SV=2
Cluster-3.12570	401.1	1.54054	9.59e-11	sp_Q9P2P1_NYNRI_HUMAN_Protein_NYNRIN_OS=Homo_sapiens_OX=9606_GN=NYNRIN_PE=2_SV=3
Cluster-1112.0	2070.51	-2.62324	9.66e-11	sp_Q7Z7G0_TARSH_HUMAN_Target_of_Nesh-SH3_OS=Homo_sapiens_OX=9606_GN=ABI3BP_PE=1_SV=1
Cluster-919.0	3036.66	-1.20889	9.87e-11	sp_Q9DER7_TLL1_CHICK_Tolloid-like_protein_1_OS=Gallus_gallus_OX=9031_GN=TLL1_PE=2_SV=1
Cluster-2563.0	4157.74	-2.33757	9.97e-11	sp_O95342_ABCBB_HUMAN_Bile_salt_export_pump_OS=Homo_sapiens_OX=9606_GN=ABCB11_PE=1_SV=2
Cluster-3.7862	192.836	-1.91036	1.01e-10	sp_A1IGX5_FIBIN_DANRE_Fin_bud_initiation_factor_OS=Danio_rerio_OX=7955_GN=fibin_PE=2_SV=1
Cluster-6257.0	911.006	-1.58724	1.01e-10	sp_A4II73_OVCA2_XENTR_Esterase_OVCA2_OS=Xenopus_tropicalis_OX=8364_GN=ovca2_PE=2_SV=2
Cluster-3.2241	454.732	-1.25324	1.04e-10	sp_Q5ZJX5_TLDC1_CHICK_TLD_domain-containing_protein_1_OS=Gallus_gallus_OX=9031_GN=TLDC1_PE=2_SV=1
Cluster-3.11803	193.736	1.34744	1.07e-10
Cluster-4321.0	1069.49	-1.44383	1.07e-10	sp_O94827_PKHG5_HUMAN_Pleckstrin_homology_domain-containing_family_G_member_5_OS=Homo_sapiens_OX=9606_GN=PLEKHG5_PE=1_SV=3
Cluster-30.0	1400.68	-1.81823	1.09e-10	sp_Q3MI05_PPGB_BOVIN_Lysosomal_protective_protein_OS=Bos_taurus_OX=9913_GN=CTSA_PE=2_SV=1
Cluster-4454.0	5137.42	-1.51228	1.09e-10	sp_Q8NBX0_SCPDL_HUMAN_Saccharopine_dehydrogenase-like_oxidoreductase_OS=Homo_sapiens_OX=9606_GN=SCCPDH_PE=1_SV=1
Cluster-13350.0	2310.13	-2.83005	1.1e-10	sp_Q9GL50_STEA1_PIG_Metalloreductase_STEAP1_OS=Sus_scrofa_OX=9823_GN=STEAP1_PE=2_SV=1
Cluster-3.3788	383.563	1.68946	1.11e-10
Cluster-15293.0	111.06	2.95935	1.19e-10	sp_Q6INE5_RHG19_XENLA_Rho_GTPase-activating_protein_19_OS=Xenopus_laevis_OX=8355_GN=arhgap19_PE=2_SV=1
Cluster-3.2732	2380.83	-1.85832	1.19e-10	sp_Q9XSB8_TPP1_CANLF_Tripeptidyl-peptidase_1_OS=Canis_lupus_familiaris_OX=9615_GN=TPP1_PE=3_SV=1
Cluster-2184.0	1654.57	-1.83206	1.2e-10	sp_P54296_MYOM2_HUMAN_Myomesin-2_OS=Homo_sapiens_OX=9606_GN=MYOM2_PE=1_SV=2
Cluster-7131.0	3843.24	-2.05078	1.21e-10	sp_Q5RJW5_IRS2B_XENLA_Insulin_receptor_substrate_2-B_OS=Xenopus_laevis_OX=8355_GN=irs2-b_PE=2_SV=1
Cluster-4518.2	943.847	-1.54018	1.21e-10	sp_Q9NS68_TNR19_HUMAN_Tumor_necrosis_factor_receptor_superfamily_member_19_OS=Homo_sapiens_OX=9606_GN=TNFRSF19_PE=1_SV=1
Cluster-15191.0	2744.95	-2.46681	1.21e-10	sp_Q4R5E2_NDUA2_MACFA_NADH_dehydrogenase_[ubiquinone]_1_alpha_subcomplex_subunit_2_OS=Macaca_fascicularis_OX=9541_GN=NDUFA2_PE=3_SV=3
Cluster-698.0	1111.41	-2.17691	1.21e-10	sp_Q5E9C0_RSU1_BOVIN_Ras_suppressor_protein_1_OS=Bos_taurus_OX=9913_GN=RSU1_PE=2_SV=1
Cluster-16291.0	72.0297	2.20896	1.22e-10
Cluster-11715.0	3865.35	-2.68382	1.24e-10	sp_P54149_MSRA_BOVIN_Mitochondrial_peptide_methionine_sulfoxide_reductase_OS=Bos_taurus_OX=9913_GN=MSRA_PE=1_SV=2
Cluster-1227.0	241.68	-1.7857	1.25e-10	sp_Q9H0R1_AP5M1_HUMAN_AP-5_complex_subunit_mu-1_OS=Homo_sapiens_OX=9606_GN=AP5M1_PE=1_SV=2
Cluster-3.3684	197.017	-2.24152	1.25e-10	sp_Q28IV8_NGDN_XENTR_Neuroguidin_OS=Xenopus_tropicalis_OX=8364_GN=ngdn_PE=2_SV=1
Cluster-3611.0	9304.43	-2.67288	1.26e-10	sp_Q15049_MLC1_HUMAN_Membrane_protein_MLC1_OS=Homo_sapiens_OX=9606_GN=MLC1_PE=1_SV=5
Cluster-14361.0	73.3132	2.32475	1.26e-10
Cluster-3.1182	143.37	-1.67598	1.32e-10
Cluster-3.10226	120.922	1.4987	1.32e-10
Cluster-7067.0	141.581	2.06142	1.35e-10
Cluster-15725.0	624.552	-1.03644	1.37e-10	sp_O14986_PI51B_HUMAN_Phosphatidylinositol_4-phosphate_5-kinase_type-1_beta_OS=Homo_sapiens_OX=9606_GN=PIP5K1B_PE=1_SV=2
Cluster-3721.0	607.052	-1.87237	1.39e-10
Cluster-3.11900	3781.66	-1.93795	1.4e-10	sp_Q96JA3_PKHA8_HUMAN_Pleckstrin_homology_domain-containing_family_A_member_8_OS=Homo_sapiens_OX=9606_GN=PLEKHA8_PE=1_SV=3
Cluster-8777.0	2896.04	-1.05361	1.4e-10	sp_O75911_DHRS3_HUMAN_Short-chain_dehydrogenase/reductase_3_OS=Homo_sapiens_OX=9606_GN=DHRS3_PE=1_SV=2
Cluster-3948.0	3877.04	-1.77733	1.44e-10	sp_P21548_GBRG2_CHICK_Gamma-aminobutyric_acid_receptor_subunit_gamma-2_OS=Gallus_gallus_OX=9031_GN=GABRG2_PE=2_SV=1
Cluster-11916.0	2127.29	-1.22257	1.48e-10	sp_P35555_FBN1_HUMAN_Fibrillin-1_OS=Homo_sapiens_OX=9606_GN=FBN1_PE=1_SV=3
Cluster-13549.0	229.219	-2.00886	1.49e-10	sp_Q13884_SNTB1_HUMAN_Beta-1-syntrophin_OS=Homo_sapiens_OX=9606_GN=SNTB1_PE=1_SV=3
Cluster-3.3172	799.729	-1.4472	1.49e-10
Cluster-3.12724	72.2472	-2.09711	1.51e-10
Cluster-5906.0	694.245	-2.47212	1.53e-10	sp_A6H8T2_CASC1_DANRE_Protein_CASC1_OS=Danio_rerio_OX=7955_GN=casc1_PE=2_SV=2
Cluster-7229.1	32110	-2.22307	1.54e-10	sp_Q5XIE8_ITM2B_RAT_Integral_membrane_protein_2B_OS=Rattus_norvegicus_OX=10116_GN=Itm2b_PE=2_SV=1
Cluster-7580.0	766.897	-2.01642	1.54e-10	sp_Q2NKS2_COX16_BOVIN_Cytochrome_c_oxidase_assembly_protein_COX16_homolog,_mitochondrial_OS=Bos_taurus_OX=9913_GN=COX16_PE=3_SV=1
Cluster-3.9012	117.617	-2.69731	1.54e-10	sp_P01633_KV5A1_MOUSE_Ig_kappa_chain_V19-17_OS=Mus_musculus_OX=10090_GN=Igk-V19-17_PE=1_SV=1
Cluster-15038.0	2481.9	-2.27058	1.55e-10
Cluster-11793.0	585.082	1.00521	1.55e-10	sp_Q9Z0W3_NU160_MOUSE_Nuclear_pore_complex_protein_Nup160_OS=Mus_musculus_OX=10090_GN=Nup160_PE=1_SV=2
Cluster-328.0	183.444	-1.12852	1.55e-10	sp_Q9DBA6_TYSD1_MOUSE_Peroxisomal_leader_peptide-processing_protease_OS=Mus_musculus_OX=10090_GN=Tysnd1_PE=1_SV=1
Cluster-3.4567	164.572	1.87056	1.55e-10
Cluster-13199.0	800.121	-2.50711	1.58e-10
Cluster-3.6985	2003.49	-1.07877	1.58e-10	sp_Q5SRI9_MANEA_HUMAN_Glycoprotein_endo-alpha-1,2-mannosidase_OS=Homo_sapiens_OX=9606_GN=MANEA_PE=1_SV=1
Cluster-3.9930	1064.11	-1.25236	1.58e-10	sp_P63132_PO113_HUMAN_Endogenous_retrovirus_group_K_member_113_Pol_protein_OS=Homo_sapiens_OX=9606_GN=HERVK_113_PE=3_SV=1
Cluster-15880.0	1755.38	-1.04301	1.59e-10	sp_O95831_AIFM1_HUMAN_Apoptosis-inducing_factor_1,_mitochondrial_OS=Homo_sapiens_OX=9606_GN=AIFM1_PE=1_SV=1
Cluster-14288.0	5010.8	-2.81818	1.6e-10	sp_Q02371_NDUA3_BOVIN_NADH_dehydrogenase_[ubiquinone]_1_alpha_subcomplex_subunit_3_OS=Bos_taurus_OX=9913_GN=NDUFA3_PE=1_SV=2
Cluster-6662.2	3321.86	-1.82302	1.61e-10	sp_Q9DB00_GON4L_MOUSE_GON-4-like_protein_OS=Mus_musculus_OX=10090_GN=Gon4l_PE=1_SV=3
Cluster-14516.1	533.172	-1.90791	1.61e-10	sp_Q5BLZ2_PLIN3_PIG_Perilipin-3_OS=Sus_scrofa_OX=9823_GN=PLIN3_PE=2_SV=1
Cluster-362.0	157.747	-5.29849	1.64e-10
Cluster-12536.1	444.97	-2.00534	1.67e-10
Cluster-3.3123	195.276	1.64356	1.69e-10	sp_O35326_SRSF5_MOUSE_Serine/arginine-rich_splicing_factor_5_OS=Mus_musculus_OX=10090_GN=Srsf5_PE=1_SV=2
Cluster-3.3571	3060.33	-1.93723	1.69e-10	sp_Q9DB50_AP1S2_MOUSE_AP-1_complex_subunit_sigma-2_OS=Mus_musculus_OX=10090_GN=Ap1s2_PE=1_SV=1
Cluster-10122.0	298.429	1.38361	1.69e-10
Cluster-3.6872	3546	-1.67256	1.7e-10	sp_Q6DRD9_ABHDB_DANRE_Protein_ABHD11_OS=Danio_rerio_OX=7955_GN=abhd11_PE=2_SV=1
Cluster-15245.0	411.548	1.4374	1.71e-10
Cluster-15913.1	7647.33	-1.33619	1.75e-10	sp_Q2KIX1_GA45G_BOVIN_Growth_arrest_and_DNA_damage-inducible_protein_GADD45_gamma_OS=Bos_taurus_OX=9913_GN=GADD45G_PE=2_SV=1
Cluster-4993.0	153.828	2.73912	1.75e-10	sp_P79732_RIR1_DANRE_Ribonucleoside-diphosphate_reductase_large_subunit_OS=Danio_rerio_OX=7955_GN=rrm1_PE=2_SV=1
Cluster-3.12170	239.078	1.20169	1.75e-10	sp_Q5ZIW1_PEO1_CHICK_Twinkle_protein,_mitochondrial_OS=Gallus_gallus_OX=9031_GN=TWNK_PE=2_SV=1
Cluster-3.7738	200.661	1.48791	1.78e-10
Cluster-3.5139	175.01	1.38119	1.8e-10
Cluster-12017.0	550.511	-2.61916	1.83e-10	sp_Q6DJ87_CC90B_XENTR_Coiled-coil_domain-containing_protein_90B,_mitochondrial_OS=Xenopus_tropicalis_OX=8364_GN=ccdc90b_PE=2_SV=2
Cluster-3.5828	14083.2	-2.05347	1.86e-10	sp_P46096_SYT1_MOUSE_Synaptotagmin-1_OS=Mus_musculus_OX=10090_GN=Syt1_PE=1_SV=1
Cluster-2851.0	240.517	1.21002	1.87e-10	sp_Q9BQ61_TRIR_HUMAN_Telomerase_RNA_component_interacting_RNase_OS=Homo_sapiens_OX=9606_GN=TRIR_PE=1_SV=1
Cluster-3.3762	1300.46	-1.67276	1.89e-10	sp_Q969X5_ERGI1_HUMAN_Endoplasmic_reticulum-Golgi_intermediate_compartment_protein_1_OS=Homo_sapiens_OX=9606_GN=ERGIC1_PE=1_SV=1
Cluster-3.6102	2397.51	-1.2961	1.9e-10	sp_Q6PJW8_CNST_HUMAN_Consortin_OS=Homo_sapiens_OX=9606_GN=CNST_PE=1_SV=3
Cluster-10974.0	285.791	-1.7335	1.93e-10	sp_Q5I0M0_SETMR_RAT_Histone-lysine_N-methyltransferase_SETMAR_OS=Rattus_norvegicus_OX=10116_GN=Setmar_PE=2_SV=1
Cluster-12772.1	1559.14	-1.05466	1.96e-10	sp_P11533_DMD_CHICK_Dystrophin_OS=Gallus_gallus_OX=9031_GN=DMD_PE=2_SV=1
Cluster-13942.0	154.668	-1.83188	1.96e-10	sp_Q61686_CBX5_MOUSE_Chromobox_protein_homolog_5_OS=Mus_musculus_OX=10090_GN=Cbx5_PE=1_SV=1
Cluster-3.1186	1013.23	-1.2	2.01e-10
Cluster-3.2774	410.848	-2.00007	2.05e-10	sp_Q810D1_CHP2_RAT_Calcineurin_B_homologous_protein_2_OS=Rattus_norvegicus_OX=10116_GN=Chp2_PE=1_SV=1
Cluster-3.1261	413.419	1.20662	2.1e-10
Cluster-3.6465	642.097	1.11153	2.1e-10
Cluster-3.602	3141.69	-1.79631	2.1e-10	sp_Q9Y6I9_TX264_HUMAN_Testis-expressed_protein_264_OS=Homo_sapiens_OX=9606_GN=TEX264_PE=1_SV=1
Cluster-3.6140	535.069	1.10273	2.12e-10	sp_P08043_ZFP2_MOUSE_Zinc_finger_protein_2_OS=Mus_musculus_OX=10090_GN=Zfp2_PE=2_SV=2
Cluster-3.823	3330.78	-2.26272	2.19e-10	sp_Q91499_DSA2B_TORMA_Dispanin_subfamily_A_member_2b_OS=Torpedo_marmorata_OX=7788_PE=2_SV=1
Cluster-5694.0	2923.48	-1.94537	2.3e-10	sp_Q16543_CDC37_HUMAN_Hsp90_co-chaperone_Cdc37_OS=Homo_sapiens_OX=9606_GN=CDC37_PE=1_SV=1
Cluster-3.12759	62.2912	2.10142	2.32e-10
Cluster-3.10869	1139.46	1.26989	2.38e-10	sp_Q80UG8_TTLL4_MOUSE_Tubulin_polyglutamylase_TTLL4_OS=Mus_musculus_OX=10090_GN=Ttll4_PE=2_SV=3
Cluster-12316.0	1188.22	-1.67059	2.38e-10	sp_Q66KY3_CUTA_XENLA_Protein_CutA_homolog_OS=Xenopus_laevis_OX=8355_GN=cuta_PE=2_SV=2
Cluster-14337.0	464.042	-1.16966	2.4e-10	sp_Q80UP5_AN13A_MOUSE_Ankyrin_repeat_domain-containing_protein_13A_OS=Mus_musculus_OX=10090_GN=Ankrd13a_PE=1_SV=2
Cluster-3.13175	7968.2	-1.12577	2.4e-10	sp_Q5MJ86_G3P2_DANRE_Glyceraldehyde-3-phosphate_dehydrogenase_2_OS=Danio_rerio_OX=7955_GN=gapdh-2_PE=2_SV=1
Cluster-3.9198	9511.2	-1.67423	2.4e-10	sp_Q16222_UAP1_HUMAN_UDP-N-acetylhexosamine_pyrophosphorylase_OS=Homo_sapiens_OX=9606_GN=UAP1_PE=1_SV=3
Cluster-7505.0	137.89	-2.26212	2.43e-10
Cluster-3.4248	673.96	2.24739	2.44e-10
Cluster-2173.0	480.656	-3.71219	2.45e-10
Cluster-3.4123	121.635	1.40345	2.5e-10	sp_Q4R8N2_LIN9_MACFA_Protein_lin-9_homolog_OS=Macaca_fascicularis_OX=9541_GN=LIN9_PE=2_SV=1
Cluster-2903.2	72.2838	1.68409	2.51e-10
Cluster-3.11678	3645.65	1.20147	2.51e-10	sp_Q9UDT6_CLIP2_HUMAN_CAP-Gly_domain-containing_linker_protein_2_OS=Homo_sapiens_OX=9606_GN=CLIP2_PE=1_SV=1
Cluster-3692.0	104.172	-1.63478	2.51e-10
Cluster-8750.0	342.578	-2.11496	2.53e-10	sp_Q8NE22_SETD9_HUMAN_SET_domain-containing_protein_9_OS=Homo_sapiens_OX=9606_GN=SETD9_PE=2_SV=2
Cluster-3554.0	3941.22	-1.23771	2.57e-10	sp_Q6PBU5_GRT1A_DANRE_Growth_hormone-regulated_TBC_protein_1-A_OS=Danio_rerio_OX=7955_GN=grtp1a_PE=2_SV=1
Cluster-13208.0	1192.41	1.87229	2.59e-10	sp_Q8IVL1_NAV2_HUMAN_Neuron_navigator_2_OS=Homo_sapiens_OX=9606_GN=NAV2_PE=1_SV=3
Cluster-3.11766	67.2637	1.42955	2.6e-10
Cluster-11221.0	15889	-1.39883	2.64e-10	sp_Q6W2J9_BCOR_HUMAN_BCL-6_corepressor_OS=Homo_sapiens_OX=9606_GN=BCOR_PE=1_SV=1
Cluster-15530.0	1705.02	-2.30821	2.64e-10	sp_P63037_DNJA1_MOUSE_DnaJ_homolog_subfamily_A_member_1_OS=Mus_musculus_OX=10090_GN=Dnaja1_PE=1_SV=1
Cluster-3.10344	6040.94	-2.74944	2.66e-10	sp_O15182_CETN3_HUMAN_Centrin-3_OS=Homo_sapiens_OX=9606_GN=CETN3_PE=1_SV=2
Cluster-3.3234	602.12	1.23919	2.69e-10	sp_Q6DDP3_ENPP6_XENLA_Ectonucleotide_pyrophosphatase/phosphodiesterase_family_member_6_OS=Xenopus_laevis_OX=8355_GN=enpp6_PE=2_SV=1
Cluster-10905.0	157.747	-2.03559	2.69e-10	sp_Q08DN7_VAV_BOVIN_Proto-oncogene_vav_OS=Bos_taurus_OX=9913_GN=VAV1_PE=2_SV=1
Cluster-16760.0	2824.8	-1.60912	2.75e-10	sp_Q8UW59_PARK7_CHICK_Protein/nucleic_acid_deglycase_DJ-1_OS=Gallus_gallus_OX=9031_GN=PARK7_PE=2_SV=1
Cluster-3.6306	292.762	1.726	2.76e-10
Cluster-3.64	1592.17	-1.40506	2.76e-10	sp_Q9D9K3_AVEN_MOUSE_Cell_death_regulator_Aven_OS=Mus_musculus_OX=10090_GN=Aven_PE=1_SV=2
Cluster-3.7591	2285.3	1.08547	2.77e-10
Cluster-3.8431	2587.72	-2.15059	2.81e-10	sp_Q6GLE1_CCD25_XENTR_Coiled-coil_domain-containing_protein_25_OS=Xenopus_tropicalis_OX=8364_GN=ccdc25_PE=2_SV=1
Cluster-14513.0	264.663	1.30729	2.81e-10
Cluster-2155.0	120.925	1.89848	2.84e-10
Cluster-12536.0	360.84	-1.82087	2.87e-10	sp_Q9EPA7_NMNA1_MOUSE_Nicotinamide/nicotinic_acid_mononucleotide_adenylyltransferase_1_OS=Mus_musculus_OX=10090_GN=Nmnat1_PE=1_SV=2
Cluster-12851.2	706.444	-2.58141	2.88e-10
Cluster-3.3131	343.135	1.76239	2.88e-10
Cluster-15064.0	490.996	-2.16065	2.88e-10	sp_Q32KW9_IIGP5_BOVIN_Interferon-inducible_GTPase_5_OS=Bos_taurus_OX=9913_GN=IRGC_PE=2_SV=1
Cluster-9733.0	673.881	-2.10579	2.94e-10	sp_O18831_GDF8_PIG_Growth/differentiation_factor_8_OS=Sus_scrofa_OX=9823_GN=MSTN_PE=2_SV=1
Cluster-14107.0	93.5538	1.41807	2.97e-10	sp_Q9P2F5_STOX2_HUMAN_Storkhead-box_protein_2_OS=Homo_sapiens_OX=9606_GN=STOX2_PE=2_SV=2
Cluster-4897.0	220.136	-1.72578	2.98e-10
Cluster-3.3662	1268.3	-1.73983	3e-10	sp_Q61739_ITA6_MOUSE_Integrin_alpha-6_OS=Mus_musculus_OX=10090_GN=Itga6_PE=1_SV=3
Cluster-3.2792	2148.65	-1.4318	3.01e-10	sp_P45478_PPT1_BOVIN_Palmitoyl-protein_thioesterase_1_OS=Bos_taurus_OX=9913_GN=PPT1_PE=1_SV=1
Cluster-3.747	7608.81	-2.30301	3.01e-10	sp_Q8TEU8_WFKN2_HUMAN_WAP,_Kazal,_immunoglobulin,_Kunitz_and_NTR_domain-containing_protein_2_OS=Homo_sapiens_OX=9606_GN=WFIKKN2_PE=1_SV=1
Cluster-3.12922	1340.26	-1.31938	3.07e-10	sp_Q5R573_RBL2A_PONAB_Rab-like_protein_2A_OS=Pongo_abelii_OX=9601_GN=RABL2A_PE=2_SV=1
Cluster-3.11709	6604.86	-2.387	3.15e-10	sp_Q9DA39_LFG4_MOUSE_Protein_lifeguard_4_OS=Mus_musculus_OX=10090_GN=Tmbim4_PE=2_SV=1
Cluster-2270.0	2543.45	-1.94143	3.23e-10
Cluster-3.12888	2902.46	-1.3244	3.26e-10	sp_Q2TBU2_TMX2_BOVIN_Thioredoxin-related_transmembrane_protein_2_OS=Bos_taurus_OX=9913_GN=TMX2_PE=2_SV=1
Cluster-15145.1	90.723	-2.74784	3.27e-10	sp_Q28260_VCAM1_CANLF_Vascular_cell_adhesion_protein_1_OS=Canis_lupus_familiaris_OX=9615_GN=VCAM1_PE=2_SV=1
Cluster-16329.0	101.011	-1.52098	3.29e-10	sp_F1Q506_SNXAA_DANRE_Sorting_nexin-10A_OS=Danio_rerio_OX=7955_GN=snx10a_PE=1_SV=1
Cluster-1562.0	705.778	-2.10443	3.31e-10	sp_Q9H3G5_CPVL_HUMAN_Probable_serine_carboxypeptidase_CPVL_OS=Homo_sapiens_OX=9606_GN=CPVL_PE=1_SV=2
Cluster-3.8558	8684.53	-1.40268	3.32e-10	sp_Q9GKW3_ALDOC_MACFA_Fructose-bisphosphate_aldolase_C_OS=Macaca_fascicularis_OX=9541_GN=ALDOC_PE=2_SV=3
Cluster-3.8739	6160.43	-1.10516	3.34e-10
Cluster-3745.0	89.127	1.45629	3.36e-10	sp_Q6DE14_E2F4_XENLA_Transcription_factor_E2F4_OS=Xenopus_laevis_OX=8355_GN=e2f4_PE=1_SV=1
Cluster-3.1251	2521.43	-2.47006	3.41e-10	sp_Q91499_DSA2B_TORMA_Dispanin_subfamily_A_member_2b_OS=Torpedo_marmorata_OX=7788_PE=2_SV=1
Cluster-5383.2	1259.69	1.2633	3.43e-10	sp_P08548_LIN1_NYCCO_LINE-1_reverse_transcriptase_homolog_OS=Nycticebus_coucang_OX=9470_PE=3_SV=1
Cluster-3.5248	573.548	-1.17713	3.44e-10	sp_Q9D0I9_SYRC_MOUSE_Arginine--tRNA_ligase,_cytoplasmic_OS=Mus_musculus_OX=10090_GN=Rars_PE=1_SV=2
Cluster-3.3405	867.842	-2.49764	3.45e-10	sp_Q6NWG0_TSN36_DANRE_Tetraspanin-36_OS=Danio_rerio_OX=7955_GN=tspan36_PE=1_SV=2
Cluster-3.5687	65.4612	1.75308	3.6e-10	sp_Q5DTZ0_NYNRI_MOUSE_Protein_NYNRIN_OS=Mus_musculus_OX=10090_GN=Nynrin_PE=2_SV=2
Cluster-3.8829	530.298	1.7447	3.61e-10	sp_P0CF97_F200B_HUMAN_Protein_FAM200B_OS=Homo_sapiens_OX=9606_GN=FAM200B_PE=3_SV=1
Cluster-12775.0	1829.17	-2.46652	3.61e-10	sp_Q1JQ92_POP5_BOVIN_Ribonuclease_P/MRP_protein_subunit_POP5_OS=Bos_taurus_OX=9913_GN=POP5_PE=2_SV=1
Cluster-3642.0	3134.5	-2.31222	3.61e-10
Cluster-3.7899	10350.6	-1.78529	3.63e-10	sp_Q28I13_CR032_XENTR_UPF0729_protein_C18orf32_homolog_OS=Xenopus_tropicalis_OX=8364_GN=TEgg055k19.1_PE=3_SV=1
Cluster-3.6797	3383.84	-2.53729	3.65e-10	sp_Q4R4E0_NDUB5_MACFA_NADH_dehydrogenase_[ubiquinone]_1_beta_subcomplex_subunit_5,_mitochondrial_OS=Macaca_fascicularis_OX=9541_GN=NDUFB5_PE=2_SV=1
Cluster-3.13198	384.886	1.47828	3.72e-10
Cluster-3.3021	11803.6	-1.9438	3.75e-10	sp_P35803_GPM6B_MOUSE_Neuronal_membrane_glycoprotein_M6-b_OS=Mus_musculus_OX=10090_GN=Gpm6b_PE=1_SV=2
Cluster-3.12118	4679.65	-2.6734	3.82e-10	sp_Q9DG25_POPD3_CHICK_Popeye_domain-containing_protein_3_OS=Gallus_gallus_OX=9031_GN=POPDC3_PE=2_SV=1
Cluster-11978.1	72.2791	1.83362	3.9e-10	sp_A5D962_PHF23_BOVIN_PHD_finger_protein_23_OS=Bos_taurus_OX=9913_GN=PHF23_PE=2_SV=1
Cluster-2719.0	294.963	1.8099	3.94e-10	sp_Q62261_SPTB2_MOUSE_Spectrin_beta_chain,_non-erythrocytic_1_OS=Mus_musculus_OX=10090_GN=Sptbn1_PE=1_SV=2
Cluster-14579.1	756.621	-1.55536	4e-10	sp_Q7L5A3_F214B_HUMAN_Protein_FAM214B_OS=Homo_sapiens_OX=9606_GN=FAM214B_PE=1_SV=1
Cluster-3.4069	165.498	1.41756	4.02e-10
Cluster-9544.0	72.8	1.84423	4.11e-10
Cluster-5185.0	654.011	-1.35639	4.19e-10	sp_Q5PU49_KPCD_CANLF_Protein_kinase_C_delta_type_OS=Canis_lupus_familiaris_OX=9615_GN=PRKCD_PE=2_SV=1
Cluster-13603.0	903.357	-1.73375	4.29e-10	sp_Q80ZD9_AMGO2_MOUSE_Amphoterin-induced_protein_2_OS=Mus_musculus_OX=10090_GN=Amigo2_PE=1_SV=1
Cluster-5356.2	950.082	-1.56767	4.33e-10	sp_Q96B96_TM159_HUMAN_Promethin_OS=Homo_sapiens_OX=9606_GN=TMEM159_PE=1_SV=2
Cluster-3.6615	119.471	1.8898	4.33e-10
Cluster-1485.0	279.353	-1.97707	4.55e-10	sp_P49716_CEBPD_HUMAN_CCAAT/enhancer-binding_protein_delta_OS=Homo_sapiens_OX=9606_GN=CEBPD_PE=1_SV=2
Cluster-3.11248	4132.86	-1.48418	4.56e-10	sp_Q8N584_TT39C_HUMAN_Tetratricopeptide_repeat_protein_39C_OS=Homo_sapiens_OX=9606_GN=TTC39C_PE=2_SV=2
Cluster-3.1528	19245	-2.40275	4.58e-10	sp_Q96FC7_PHIPL_HUMAN_Phytanoyl-CoA_hydroxylase-interacting_protein-like_OS=Homo_sapiens_OX=9606_GN=PHYHIPL_PE=1_SV=3
Cluster-3.2794	297.994	1.74532	4.58e-10
Cluster-3.12567	657.057	1.11096	4.63e-10
Cluster-3.1879	441.385	-2.2934	4.64e-10	sp_A3KMP2_TTC38_MOUSE_Tetratricopeptide_repeat_protein_38_OS=Mus_musculus_OX=10090_GN=Ttc38_PE=1_SV=2
Cluster-10053.0	106.544	1.33794	4.65e-10
Cluster-3974.0	199.337	1.25726	4.67e-10
Cluster-8401.0	550.977	1.98775	4.76e-10	sp_Q63689_NDF2_RAT_Neurogenic_differentiation_factor_2_OS=Rattus_norvegicus_OX=10116_GN=Neurod2_PE=1_SV=2
Cluster-1579.0	555.958	1.46125	4.83e-10	sp_Q7ZY56_HEAT6_XENLA_HEAT_repeat-containing_protein_6_OS=Xenopus_laevis_OX=8355_GN=heatr6_PE=2_SV=1
Cluster-9617.0	953.644	-1.20815	4.84e-10	sp_O15105_SMAD7_HUMAN_Mothers_against_decapentaplegic_homolog_7_OS=Homo_sapiens_OX=9606_GN=SMAD7_PE=1_SV=1
Cluster-3.6734	248.759	1.63777	4.86e-10
Cluster-6336.0	547.604	-2.45845	4.86e-10	sp_Q6DGP4_NFI1L_DANRE_NEDD4_family-interacting_protein_1-like_OS=Danio_rerio_OX=7955_GN=ndfip1l_PE=2_SV=1
Cluster-15741.0	366.889	-2.49913	5.02e-10	sp_Q5R4W7_SDHF2_PONAB_Succinate_dehydrogenase_assembly_factor_2,_mitochondrial_OS=Pongo_abelii_OX=9601_GN=SDHAF2_PE=2_SV=1
Cluster-3.9352	139.776	-2.46068	5.09e-10	sp_Q6ZN08_ZNF66_HUMAN_Putative_zinc_finger_protein_66_OS=Homo_sapiens_OX=9606_GN=ZNF66_PE=5_SV=3
Cluster-1307.0	163.09	-2.0496	5.12e-10	sp_O62646_SYPL2_RABIT_Synaptophysin-like_protein_2_OS=Oryctolagus_cuniculus_OX=9986_GN=SYPL2_PE=2_SV=1
Cluster-3.11022	1480.72	-1.14602	5.15e-10	sp_Q8WXH2_JPH3_HUMAN_Junctophilin-3_OS=Homo_sapiens_OX=9606_GN=JPH3_PE=2_SV=2
Cluster-3.5065	723.051	-1.83425	5.15e-10	sp_Q95KF9_NO40_MACFA_Nucleolar_protein_of_40_kDa_OS=Macaca_fascicularis_OX=9541_GN=ZCCHC17_PE=2_SV=1
Cluster-3.5423	694.967	1.05393	5.16e-10	sp_P54802_ANAG_HUMAN_Alpha-N-acetylglucosaminidase_OS=Homo_sapiens_OX=9606_GN=NAGLU_PE=1_SV=2
Cluster-3.8974	355.998	1.71463	5.18e-10
Cluster-11507.0	650.462	-2.44495	5.2e-10	sp_Q9Z336_DYLT1_RAT_Dynein_light_chain_Tctex-type_1_OS=Rattus_norvegicus_OX=10116_GN=Dynlt1_PE=1_SV=1
Cluster-3.6497	1014.24	-1.8892	5.22e-10	sp_P82920_RT21_BOVIN_28S_ribosomal_protein_S21,_mitochondrial_OS=Bos_taurus_OX=9913_GN=MRPS21_PE=1_SV=3
Cluster-11456.0	649.825	-2.42944	5.24e-10	sp_Q98SV0_SELPB_DANRE_Selenoprotein_Pb_OS=Danio_rerio_OX=7955_GN=sepp1b_PE=2_SV=3
Cluster-3.910	103.313	1.45646	5.24e-10
Cluster-8074.1	1358.65	1.75745	5.28e-10
Cluster-3.392	170.596	1.3217	5.29e-10
Cluster-2038.0	5157.09	-2.25291	5.32e-10	sp_P19440_GGT1_HUMAN_Glutathione_hydrolase_1_proenzyme_OS=Homo_sapiens_OX=9606_GN=GGT1_PE=1_SV=2
Cluster-2595.0	233.843	-1.08579	5.37e-10
Cluster-6649.0	11406.8	-2.173	5.37e-10
Cluster-3.10173	3140.93	-1.01836	5.43e-10	sp_Q2TBU2_TMX2_BOVIN_Thioredoxin-related_transmembrane_protein_2_OS=Bos_taurus_OX=9913_GN=TMX2_PE=2_SV=1
Cluster-11059.1	7615.89	-2.62089	5.57e-10	sp_Q16774_KGUA_HUMAN_Guanylate_kinase_OS=Homo_sapiens_OX=9606_GN=GUK1_PE=1_SV=2
Cluster-3.10244	733.048	1.09136	5.61e-10
Cluster-8049.1	287.343	-1.85196	5.7e-10	sp_P53590_SUCB2_PIG_Succinate--CoA_ligase_[GDP-forming]_subunit_beta,_mitochondrial_(Fragment)_OS=Sus_scrofa_OX=9823_GN=SUCLG2_PE=1_SV=2
Cluster-13771.0	2418.79	-1.89572	5.78e-10	sp_B1H2T2_DIA1_XENTR_Deleted_in_autism_protein_1_homolog_OS=Xenopus_tropicalis_OX=8364_PE=2_SV=1
Cluster-3.10113	9123.42	-1.44928	5.86e-10	sp_P69998_CXD2_LEUER_Gap_junction_delta-2_protein_OS=Leucoraja_erinacea_OX=7782_PE=2_SV=1
Cluster-3.13015	1432.25	-1.97179	5.93e-10
Cluster-3.11451	894.92	-1.69733	5.97e-10	sp_P53033_RFC2_CHICK_Replication_factor_C_subunit_2_OS=Gallus_gallus_OX=9031_GN=RFC2_PE=2_SV=1
Cluster-2377.0	1778.37	-2.33177	6e-10	sp_Q569L8_CENPJ_MOUSE_Centromere_protein_J_OS=Mus_musculus_OX=10090_GN=Cenpj_PE=2_SV=2
Cluster-3.4788	200.401	2.19629	6e-10	sp_D4ACX8_PCD16_RAT_Protocadherin-16_OS=Rattus_norvegicus_OX=10116_GN=Dchs1_PE=3_SV=2
Cluster-3.1811	2044.19	1.39971	6.05e-10
Cluster-3.4609	9753.97	-1.33619	6.05e-10	sp_Q9JKW0_AR6P1_MOUSE_ADP-ribosylation_factor-like_protein_6-interacting_protein_1_OS=Mus_musculus_OX=10090_GN=Arl6ip1_PE=1_SV=1
Cluster-10955.0	562.027	-1.1755	6.22e-10	sp_P48728_GCST_HUMAN_Aminomethyltransferase,_mitochondrial_OS=Homo_sapiens_OX=9606_GN=AMT_PE=1_SV=1
Cluster-3.10205	155.966	1.74734	6.26e-10
Cluster-1609.0	83.3317	-2.72774	6.29e-10	sp_Q3URF8_KCD21_MOUSE_BTB/POZ_domain-containing_protein_KCTD21_OS=Mus_musculus_OX=10090_GN=Kctd21_PE=1_SV=1
Cluster-3.4591	424.585	-1.05723	6.29e-10	sp_Q8IV61_GRP3_HUMAN_Ras_guanyl-releasing_protein_3_OS=Homo_sapiens_OX=9606_GN=RASGRP3_PE=1_SV=1
Cluster-16743.0	8673.87	-1.27801	6.36e-10	sp_Q9HCB6_SPON1_HUMAN_Spondin-1_OS=Homo_sapiens_OX=9606_GN=SPON1_PE=1_SV=2
Cluster-6455.0	1385.87	-2.17025	6.37e-10	sp_Q5ZJF4_PRDX6_CHICK_Peroxiredoxin-6_OS=Gallus_gallus_OX=9031_GN=PRDX6_PE=2_SV=3
Cluster-9744.0	850.745	-2.10197	6.42e-10
Cluster-3.11409	554.79	-1.32119	6.46e-10	sp_P54939_TLN1_CHICK_Talin-1_OS=Gallus_gallus_OX=9031_GN=TLN1_PE=1_SV=2
Cluster-8108.0	242.761	2.04145	6.46e-10
Cluster-5241.0	66.0762	1.95549	6.53e-10
Cluster-6417.0	1157.94	-1.11207	6.73e-10	sp_Q9UNH5_CC14A_HUMAN_Dual_specificity_protein_phosphatase_CDC14A_OS=Homo_sapiens_OX=9606_GN=CDC14A_PE=1_SV=1
Cluster-3.4513	1034.84	-1.03057	6.79e-10	sp_Q96AY3_FKB10_HUMAN_Peptidyl-prolyl_cis-trans_isomerase_FKBP10_OS=Homo_sapiens_OX=9606_GN=FKBP10_PE=1_SV=1
Cluster-3.1330	5228.17	-1.04863	6.81e-10	sp_Q64337_SQSTM_MOUSE_Sequestosome-1_OS=Mus_musculus_OX=10090_GN=Sqstm1_PE=1_SV=1
Cluster-3.13334	283.296	1.80882	6.84e-10
Cluster-3.5238	14363.9	-2.27638	6.89e-10	sp_Q5R512_SKP1_PONAB_S-phase_kinase-associated_protein_1_OS=Pongo_abelii_OX=9601_GN=SKP1_PE=2_SV=1
Cluster-3.6400	86.3316	1.95125	6.91e-10
Cluster-3.6082	11910.5	-1.82185	6.94e-10	sp_Q7ZX22_WDR24_XENLA_GATOR_complex_protein_WDR24_OS=Xenopus_laevis_OX=8355_GN=wdr24_PE=2_SV=1
Cluster-3.2498	163.963	1.17969	7.01e-10
Cluster-7413.0	3857.12	-1.00352	7.06e-10	sp_Q9H3E2_SNX25_HUMAN_Sorting_nexin-25_OS=Homo_sapiens_OX=9606_GN=SNX25_PE=1_SV=2
Cluster-16176.0	4449.63	-1.13044	7.06e-10	sp_Q2TBX0_ZPR1_BOVIN_Zinc_finger_protein_ZPR1_OS=Bos_taurus_OX=9913_GN=ZNF259_PE=2_SV=1
Cluster-10701.1	248.342	-1.28345	7.31e-10	sp_Q96RU3_FNBP1_HUMAN_Formin-binding_protein_1_OS=Homo_sapiens_OX=9606_GN=FNBP1_PE=1_SV=2
Cluster-3.438	6051.11	-1.70205	7.35e-10	sp_Q5R5V5_VATB2_PONAB_V-type_proton_ATPase_subunit_B,_brain_isoform_OS=Pongo_abelii_OX=9601_GN=ATP6V1B2_PE=2_SV=1
Cluster-5408.0	170.567	-1.07178	7.36e-10	sp_Q9UKP5_ATS6_HUMAN_A_disintegrin_and_metalloproteinase_with_thrombospondin_motifs_6_OS=Homo_sapiens_OX=9606_GN=ADAMTS6_PE=2_SV=2
Cluster-3.12349	349.206	1.36905	7.45e-10
Cluster-3.7525	2257.65	-1.12092	7.54e-10	sp_Q67FQ3_ARHB_XENLA_Low_density_lipoprotein_receptor_adapter_protein_1-B_OS=Xenopus_laevis_OX=8355_GN=ldlrap1-b_PE=1_SV=1
Cluster-14358.0	16566.3	-1.96428	7.55e-10	sp_Q2KJE0_TAXB1_BOVIN_Tax1-binding_protein_1_homolog_OS=Bos_taurus_OX=9913_GN=TAX1BP1_PE=2_SV=1
Cluster-3.4694	111.137	-2.40696	7.62e-10
Cluster-6339.0	80.1894	-3.15221	7.67e-10	sp_Q8UW64_PSB9_ORYLA_Proteasome_subunit_beta_type-9_OS=Oryzias_latipes_OX=8090_GN=psmb9_PE=3_SV=1
Cluster-3.6598	1691.77	-1.18333	7.68e-10	sp_Q6DEG4_LTOR2_DANRE_Ragulator_complex_protein_LAMTOR2_OS=Danio_rerio_OX=7955_GN=lamtor2_PE=2_SV=1
Cluster-3.11650	303.211	-1.65899	7.71e-10	sp_Q86WT6_TRI69_HUMAN_E3_ubiquitin-protein_ligase_TRIM69_OS=Homo_sapiens_OX=9606_GN=TRIM69_PE=1_SV=2
Cluster-9099.0	232.24	-2.29125	7.71e-10	sp_Q28IU1_DHB12_XENTR_Very-long-chain_3-oxoacyl-CoA_reductase_OS=Xenopus_tropicalis_OX=8364_GN=hsd17b12_PE=2_SV=1
Cluster-3.1550	945.768	-2.83187	7.77e-10	sp_Q9BS40_LXN_HUMAN_Latexin_OS=Homo_sapiens_OX=9606_GN=LXN_PE=1_SV=2
Cluster-3.7557	111.49	1.64036	7.96e-10	sp_Q6P5X7_TMM71_HUMAN_Transmembrane_protein_71_OS=Homo_sapiens_OX=9606_GN=TMEM71_PE=2_SV=2
Cluster-15363.0	90.5329	2.79724	8e-10
Cluster-3967.0	269.442	-2.08473	8e-10	sp_Q568D2_CF161_DANRE_Cilia-_and_flagella-associated_protein_161_OS=Danio_rerio_OX=7955_GN=cfap161_PE=2_SV=1
Cluster-3398.0	2399.04	-1.81234	8.05e-10	sp_P37805_TAGL3_RAT_Transgelin-3_OS=Rattus_norvegicus_OX=10116_GN=Tagln3_PE=1_SV=2
Cluster-12521.0	139.636	1.35541	8.14e-10	sp_Q9Z138_ROR2_MOUSE_Tyrosine-protein_kinase_transmembrane_receptor_ROR2_OS=Mus_musculus_OX=10090_GN=Ror2_PE=1_SV=2
Cluster-4770.0	874.515	-2.40865	8.14e-10	sp_Q9CZL2_F241A_MOUSE_Uncharacterized_protein_FAM241A_OS=Mus_musculus_OX=10090_GN=Fam241a_PE=1_SV=1
Cluster-14842.0	70.9025	1.88787	8.14e-10	sp_Q9H8V3_ECT2_HUMAN_Protein_ECT2_OS=Homo_sapiens_OX=9606_GN=ECT2_PE=1_SV=4
Cluster-8579.0	444.274	-1.19017	8.22e-10	sp_Q5XJN2_GILT_DANRE_Gamma-interferon-inducible_lysosomal_thiol_reductase_OS=Danio_rerio_OX=7955_GN=ifi30_PE=1_SV=1
Cluster-12810.0	61.2133	1.91756	8.35e-10
Cluster-15036.0	91.4061	-1.67251	8.36e-10	sp_Q5QNV8_HEAT9_MOUSE_Protein_HEATR9_OS=Mus_musculus_OX=10090_GN=Heatr9_PE=4_SV=1
Cluster-3.10293	2588.86	-2.46154	8.38e-10	sp_Q4R6U7_RM30_MACFA_39S_ribosomal_protein_L30,_mitochondrial_OS=Macaca_fascicularis_OX=9541_GN=MRPL30_PE=2_SV=1
Cluster-3010.0	1335.57	1.23186	8.45e-10	sp_Q9P2K8_E2AK4_HUMAN_eIF-2-alpha_kinase_GCN2_OS=Homo_sapiens_OX=9606_GN=EIF2AK4_PE=1_SV=3
Cluster-2508.0	174.855	1.23611	8.46e-10	sp_Q9HCE9_ANO8_HUMAN_Anoctamin-8_OS=Homo_sapiens_OX=9606_GN=ANO8_PE=1_SV=3
Cluster-3104.0	88.2187	-2.55155	8.46e-10	sp_Q3UY96_CFA74_MOUSE_Cilia-_and_flagella-associated_protein_74_OS=Mus_musculus_OX=10090_GN=Cfap74_PE=2_SV=3
Cluster-3627.0	1410.66	-1.90689	8.62e-10	sp_P46198_IF2M_BOVIN_Translation_initiation_factor_IF-2,_mitochondrial_OS=Bos_taurus_OX=9913_GN=MTIF2_PE=1_SV=1
Cluster-6239.0	2541.04	-1.92525	8.73e-10	sp_Q9HB40_RISC_HUMAN_Retinoid-inducible_serine_carboxypeptidase_OS=Homo_sapiens_OX=9606_GN=SCPEP1_PE=1_SV=1
Cluster-3.11167	1945.76	-2.2025	8.77e-10	sp_Q9CPX6_ATG3_MOUSE_Ubiquitin-like-conjugating_enzyme_ATG3_OS=Mus_musculus_OX=10090_GN=Atg3_PE=1_SV=1
Cluster-5719.0	83.9339	-2.55057	8.8e-10
Cluster-4151.0	153.197	-1.56306	8.9e-10	sp_Q5NCY3_CB5D1_MOUSE_Cytochrome_b5_domain-containing_protein_1_OS=Mus_musculus_OX=10090_GN=Cyb5d1_PE=2_SV=1
Cluster-10050.0	204.922	1.62189	8.98e-10	sp_Q90670_AVR2B_CHICK_Activin_receptor_type-2B_OS=Gallus_gallus_OX=9031_GN=ACVR2B_PE=2_SV=1
Cluster-5804.0	542.494	1.5862	8.98e-10	sp_Q14687_GSE1_HUMAN_Genetic_suppressor_element_1_OS=Homo_sapiens_OX=9606_GN=GSE1_PE=1_SV=3
Cluster-9908.0	1699.77	-1.01639	9.01e-10	sp_P27105_STOM_HUMAN_Erythrocyte_band_7_integral_membrane_protein_OS=Homo_sapiens_OX=9606_GN=STOM_PE=1_SV=3
Cluster-3.5577	694.978	-1.21272	9.23e-10	sp_O75146_HIP1R_HUMAN_Huntingtin-interacting_protein_1-related_protein_OS=Homo_sapiens_OX=9606_GN=HIP1R_PE=1_SV=2
Cluster-13738.0	66.8502	-2.19429	9.28e-10	sp_P51689_ARSD_HUMAN_Arylsulfatase_D_OS=Homo_sapiens_OX=9606_GN=ARSD_PE=1_SV=2
Cluster-13939.0	142.035	1.92575	9.4e-10
Cluster-3.6911	118.33	1.37326	9.41e-10	sp_O54786_DFFA_MOUSE_DNA_fragmentation_factor_subunit_alpha_OS=Mus_musculus_OX=10090_GN=Dffa_PE=1_SV=2
Cluster-3.2784	706.331	-1.11348	9.44e-10
Cluster-3.11792	266.367	1.81657	9.58e-10
Cluster-3.4101	161.589	1.4156	9.62e-10
Cluster-3.456	179.223	-1.28414	9.68e-10	sp_Q6INX1_TMM98_XENLA_Transmembrane_protein_98_OS=Xenopus_laevis_OX=8355_GN=tmem98_PE=2_SV=1
Cluster-3.5929	2036.09	-1.1421	9.68e-10	sp_Q8WY22_BRI3B_HUMAN_BRI3-binding_protein_OS=Homo_sapiens_OX=9606_GN=BRI3BP_PE=1_SV=1
Cluster-3.2219	7892.41	-2.40783	9.87e-10	sp_Q9Y244_POMP_HUMAN_Proteasome_maturation_protein_OS=Homo_sapiens_OX=9606_GN=POMP_PE=1_SV=1
Cluster-3.5155	182.047	1.64872	9.95e-10
Cluster-8933.0	2360.53	-1.98397	9.95e-10
Cluster-3.11135	145.777	1.22594	1e-09
Cluster-4590.0	545.365	-1.40723	1.01e-09	sp_Q561Y0_WDR92_DANRE_WD_repeat-containing_protein_92_OS=Danio_rerio_OX=7955_GN=wdr92_PE=2_SV=1
Cluster-2185.0	278.001	1.5315	1.01e-09	sp_Q64578_AT2A1_RAT_Sarcoplasmic/endoplasmic_reticulum_calcium_ATPase_1_OS=Rattus_norvegicus_OX=10116_GN=Atp2a1_PE=1_SV=1
Cluster-6342.0	6114.25	-2.06712	1.02e-09	sp_P29105_HPCL1_BOVIN_Hippocalcin-like_protein_1_OS=Bos_taurus_OX=9913_GN=HPCAL1_PE=1_SV=4
Cluster-8838.0	663.907	-1.21668	1.03e-09	sp_P70388_RAD50_MOUSE_DNA_repair_protein_RAD50_OS=Mus_musculus_OX=10090_GN=Rad50_PE=1_SV=1
Cluster-11661.0	131.874	1.38811	1.03e-09
Cluster-4583.0	336.95	-1.89789	1.03e-09	sp_Q592E4_CTXN2_DANRE_Cortexin-2_OS=Danio_rerio_OX=7955_GN=ctxn2_PE=3_SV=1
Cluster-1478.0	678.72	-1.0569	1.04e-09	sp_Q86YS6_RAB43_HUMAN_Ras-related_protein_Rab-43_OS=Homo_sapiens_OX=9606_GN=RAB43_PE=1_SV=1
Cluster-4857.1	103.1	1.6362	1.04e-09	sp_Q6TXD4_DNMBP_MOUSE_Dynamin-binding_protein_OS=Mus_musculus_OX=10090_GN=Dnmbp_PE=1_SV=2
Cluster-4873.0	561.344	-1.63072	1.05e-09	sp_Q8TCT0_CERK1_HUMAN_Ceramide_kinase_OS=Homo_sapiens_OX=9606_GN=CERK_PE=1_SV=1
Cluster-108.0	2993.33	-2.75254	1.06e-09	sp_O00399_DCTN6_HUMAN_Dynactin_subunit_6_OS=Homo_sapiens_OX=9606_GN=DCTN6_PE=1_SV=1
Cluster-12216.1	3196.86	-1.24204	1.06e-09
Cluster-2806.0	979.503	-2.24952	1.07e-09	sp_Q9GZQ3_COMD5_HUMAN_COMM_domain-containing_protein_5_OS=Homo_sapiens_OX=9606_GN=COMMD5_PE=1_SV=1
Cluster-3.7601	2142.44	-1.76706	1.08e-09	sp_Q9D9N8_PADC1_MOUSE_Protease-associated_domain-containing_protein_1_OS=Mus_musculus_OX=10090_GN=Pradc1_PE=1_SV=1
Cluster-14137.0	10931.5	-1.28769	1.08e-09	sp_Q15417_CNN3_HUMAN_Calponin-3_OS=Homo_sapiens_OX=9606_GN=CNN3_PE=1_SV=1
Cluster-3.4575	1189.64	-2.50122	1.1e-09	sp_Q9D7M8_RPB4_MOUSE_DNA-directed_RNA_polymerase_II_subunit_RPB4_OS=Mus_musculus_OX=10090_GN=Polr2d_PE=1_SV=2
Cluster-3.9310	5317.3	-1.57547	1.1e-09	sp_Q9NXF8_ZDHC7_HUMAN_Palmitoyltransferase_ZDHHC7_OS=Homo_sapiens_OX=9606_GN=ZDHHC7_PE=1_SV=2
Cluster-8116.0	731.908	-1.04417	1.1e-09	sp_Q61827_MAFK_MOUSE_Transcription_factor_MafK_OS=Mus_musculus_OX=10090_GN=Mafk_PE=1_SV=1
Cluster-3.10956	9495.75	-1.50388	1.12e-09	sp_P50396_GDIA_MOUSE_Rab_GDP_dissociation_inhibitor_alpha_OS=Mus_musculus_OX=10090_GN=Gdi1_PE=1_SV=3
Cluster-3.7576	11020.3	-1.84803	1.12e-09	sp_Q3MHH6_PYRD2_BOVIN_Pyridine_nucleotide-disulfide_oxidoreductase_domain-containing_protein_2_OS=Bos_taurus_OX=9913_GN=PYROXD2_PE=2_SV=1
Cluster-3.9968	1892.91	-2.57549	1.12e-09	sp_Q99LX8_OST4_MOUSE_Dolichyl-diphosphooligosaccharide--protein_glycosyltransferase_subunit_4_OS=Mus_musculus_OX=10090_GN=Ost4_PE=3_SV=1
Cluster-3.3650	178.721	1.18848	1.14e-09
Cluster-3.4355	107.58	1.29756	1.14e-09
Cluster-3.8042	336.998	1.54296	1.14e-09	sp_Q6IP59_CTL2_XENLA_Choline_transporter-like_protein_2_OS=Xenopus_laevis_OX=8355_GN=slc44a2_PE=2_SV=1
Cluster-11169.1	564.022	1.03235	1.16e-09
Cluster-3.67	181.151	2.40783	1.16e-09
Cluster-9790.0	1695.26	-2.29207	1.16e-09	sp_Q5M8Y7_MED4_XENTR_Mediator_of_RNA_polymerase_II_transcription_subunit_4_OS=Xenopus_tropicalis_OX=8364_GN=med4_PE=2_SV=1
Cluster-13270.0	681.012	-1.96149	1.16e-09	sp_Q5RAS0_ACADS_PONAB_Short-chain_specific_acyl-CoA_dehydrogenase,_mitochondrial_OS=Pongo_abelii_OX=9601_GN=ACADS_PE=2_SV=1
Cluster-3.1884	9495.2	-2.0021	1.16e-09	sp_P0C276_RL40_SHEEP_Ubiquitin-60S_ribosomal_protein_L40_OS=Ovis_aries_OX=9940_GN=UBA52_PE=2_SV=2
Cluster-9129.0	81.8105	-2.25126	1.16e-09
Cluster-3.2780	28332	-2.7044	1.16e-09	sp_Q2MHN2_FRIH_FELCA_Ferritin_heavy_chain_OS=Felis_catus_OX=9685_GN=FTH1_PE=2_SV=3
Cluster-12779.0	2646.28	-1.92071	1.17e-09	sp_Q9H6T3_RPAP3_HUMAN_RNA_polymerase_II-associated_protein_3_OS=Homo_sapiens_OX=9606_GN=RPAP3_PE=1_SV=2
Cluster-9893.0	68.5377	-1.31894	1.17e-09	sp_Q5EAJ6_IKIP_RAT_Inhibitor_of_nuclear_factor_kappa-B_kinase-interacting_protein_OS=Rattus_norvegicus_OX=10116_GN=Ikbip_PE=2_SV=1
Cluster-15819.1	95.8109	-1.4255	1.17e-09	sp_Q0VGW6_S12A9_XENLA_Solute_carrier_family_12_member_9_OS=Xenopus_laevis_OX=8355_GN=slc12a9_PE=2_SV=1
Cluster-3.3894	7890.06	-2.26984	1.17e-09	sp_Q60HE3_NDUS8_MACFA_NADH_dehydrogenase_[ubiquinone]_iron-sulfur_protein_8,_mitochondrial_OS=Macaca_fascicularis_OX=9541_GN=NDUFS8_PE=2_SV=1
Cluster-3.3649	52.4884	-1.82016	1.19e-09
Cluster-3.6976	1749.15	-2.56198	1.2e-09	sp_P09455_RET1_HUMAN_Retinol-binding_protein_1_OS=Homo_sapiens_OX=9606_GN=RBP1_PE=1_SV=2
Cluster-3.7807	1629.39	-1.34497	1.21e-09	sp_Q969T9_WBP2_HUMAN_WW_domain-binding_protein_2_OS=Homo_sapiens_OX=9606_GN=WBP2_PE=1_SV=1
Cluster-15660.1	3096.08	-1.51823	1.21e-09	sp_P43407_SDC2_MOUSE_Syndecan-2_OS=Mus_musculus_OX=10090_GN=Sdc2_PE=1_SV=1
Cluster-15878.0	570.48	-2.54768	1.22e-09	sp_A5JV83_HSPBB_DANRE_Heat_shock_protein_beta-11_OS=Danio_rerio_OX=7955_GN=hspb11_PE=2_SV=2
Cluster-3.11382	249.629	-1.34849	1.22e-09
Cluster-4491.0	197.064	-1.70688	1.22e-09	sp_Q5R7P6_ACBD4_PONAB_Acyl-CoA-binding_domain-containing_protein_4_OS=Pongo_abelii_OX=9601_GN=ACBD4_PE=2_SV=1
Cluster-9272.0	69.3397	-2.45662	1.23e-09
Cluster-3.8961	127.903	-1.5241	1.26e-09
Cluster-6566.0	220.355	-1.73286	1.27e-09
Cluster-3.3284	219.931	1.19453	1.29e-09
Cluster-15009.0	181.484	-1.41667	1.29e-09	sp_P26012_ITB8_HUMAN_Integrin_beta-8_OS=Homo_sapiens_OX=9606_GN=ITGB8_PE=2_SV=1
Cluster-3.3272	2316.94	-1.72579	1.3e-09	sp_Q16514_TAF12_HUMAN_Transcription_initiation_factor_TFIID_subunit_12_OS=Homo_sapiens_OX=9606_GN=TAF12_PE=1_SV=1
Cluster-3.4217	180.163	-2.05474	1.3e-09	sp_Q90ZM9_NRN1A_XENLA_Neuritin-A_OS=Xenopus_laevis_OX=8355_GN=nrn1-a_PE=2_SV=1
Cluster-15988.0	691.824	-2.68362	1.31e-09	sp_Q9CQ46_EFCB2_MOUSE_EF-hand_calcium-binding_domain-containing_protein_2_OS=Mus_musculus_OX=10090_GN=Efcab2_PE=1_SV=1
Cluster-3.2387	4224.41	-2.03812	1.31e-09	sp_Q9NUM4_T106B_HUMAN_Transmembrane_protein_106B_OS=Homo_sapiens_OX=9606_GN=TMEM106B_PE=1_SV=2
Cluster-11217.0	68.3828	2.1931	1.32e-09
Cluster-979.0	4897.83	-1.59299	1.32e-09	sp_O95857_TSN13_HUMAN_Tetraspanin-13_OS=Homo_sapiens_OX=9606_GN=TSPAN13_PE=2_SV=1
Cluster-5671.0	900.314	-2.5624	1.32e-09	sp_P30568_GSTA_PLEPL_Glutathione_S-transferase_A_OS=Pleuronectes_platessa_OX=8262_PE=2_SV=1
Cluster-3.8629	10751.8	-1.66854	1.32e-09	sp_P63098_CANB1_HUMAN_Calcineurin_subunit_B_type_1_OS=Homo_sapiens_OX=9606_GN=PPP3R1_PE=1_SV=2
Cluster-3.12203	355.516	1.18204	1.32e-09	sp_Q9D3R3_CEP72_MOUSE_Centrosomal_protein_of_72_kDa_OS=Mus_musculus_OX=10090_GN=Cep72_PE=1_SV=3
Cluster-3.7268	16600.5	-1.26179	1.33e-09	sp_P41320_GLNA_SQUAC_Glutamine_synthetase,_mitochondrial_OS=Squalus_acanthias_OX=7797_PE=2_SV=1
Cluster-3.8707	514.193	2.12438	1.33e-09
Cluster-3.8063	30391	-1.76919	1.34e-09	sp_Q8BSL7_ARF2_MOUSE_ADP-ribosylation_factor_2_OS=Mus_musculus_OX=10090_GN=Arf2_PE=1_SV=2
Cluster-3.9586	362.37	-2.05632	1.34e-09	sp_Q96J88_ESIP1_HUMAN_Epithelial-stromal_interaction_protein_1_OS=Homo_sapiens_OX=9606_GN=EPSTI1_PE=2_SV=2
Cluster-14684.0	5681.44	-1.32344	1.34e-09	sp_Q5F2E8_TAOK1_MOUSE_Serine/threonine-protein_kinase_TAO1_OS=Mus_musculus_OX=10090_GN=Taok1_PE=1_SV=1
Cluster-3.12912	12233.8	-2.63571	1.35e-09	sp_Q5RBW2_ATP5I_PONAB_ATP_synthase_subunit_e,_mitochondrial_OS=Pongo_abelii_OX=9601_GN=ATP5I_PE=3_SV=3
Cluster-3.6514	1289.93	-1.46899	1.35e-09	sp_A4IHY1_PSMG1_XENTR_Proteasome_assembly_chaperone_1_OS=Xenopus_tropicalis_OX=8364_GN=psmg1_PE=2_SV=1
Cluster-392.0	1551.44	-1.26752	1.35e-09	sp_Q5ZIH3_ZNT6_CHICK_Zinc_transporter_6_OS=Gallus_gallus_OX=9031_GN=SLC30A6_PE=1_SV=1
Cluster-4255.0	1431.41	-1.65456	1.36e-09	sp_Q9UKS7_IKZF2_HUMAN_Zinc_finger_protein_Helios_OS=Homo_sapiens_OX=9606_GN=IKZF2_PE=1_SV=2
Cluster-16137.0	486.022	-4.80516	1.37e-09	sp_Q91499_DSA2B_TORMA_Dispanin_subfamily_A_member_2b_OS=Torpedo_marmorata_OX=7788_PE=2_SV=1
Cluster-10638.0	1064.48	-1.26719	1.38e-09	sp_O02691_HCD2_BOVIN_3-hydroxyacyl-CoA_dehydrogenase_type-2_OS=Bos_taurus_OX=9913_GN=HSD17B10_PE=1_SV=3
Cluster-3.11861	16303.6	-2.03026	1.38e-09	sp_Q9BQ16_TICN3_HUMAN_Testican-3_OS=Homo_sapiens_OX=9606_GN=SPOCK3_PE=1_SV=2
Cluster-13931.0	62.8466	-2.39803	1.38e-09	sp_P40227_TCPZ_HUMAN_T-complex_protein_1_subunit_zeta_OS=Homo_sapiens_OX=9606_GN=CCT6A_PE=1_SV=3
Cluster-3.12756	57.6613	-2.56942	1.38e-09	sp_Q62915_CSKP_RAT_Peripheral_plasma_membrane_protein_CASK_OS=Rattus_norvegicus_OX=10116_GN=Cask_PE=1_SV=1
Cluster-3.5880	9959.13	-1.62326	1.39e-09	sp_Q6U1I9_SGK1_CHICK_Serine/threonine-protein_kinase_Sgk1_OS=Gallus_gallus_OX=9031_GN=SGK1_PE=2_SV=1
Cluster-3.11687	146.778	1.58098	1.4e-09
Cluster-13789.0	133.292	1.77383	1.41e-09	sp_Q8NG31_KNL1_HUMAN_Kinetochore_scaffold_1_OS=Homo_sapiens_OX=9606_GN=KNL1_PE=1_SV=3
Cluster-3.9867	1376.75	-2.03706	1.41e-09	sp_Q9CWZ7_SNAG_MOUSE_Gamma-soluble_NSF_attachment_protein_OS=Mus_musculus_OX=10090_GN=Napg_PE=1_SV=1
Cluster-475.3	792.056	-2.86043	1.41e-09	sp_P18470_HB2D_CANLF_DLA_class_II_histocompatibility_antigen,_DR-1_beta_chain_OS=Canis_lupus_familiaris_OX=9615_PE=2_SV=1
Cluster-3.2664	476.754	1.24178	1.44e-09	sp_P43449_CCNA2_CHICK_Cyclin-A2_OS=Gallus_gallus_OX=9031_GN=CCNA2_PE=1_SV=1
Cluster-2102.0	82.4793	-2.0349	1.45e-09
Cluster-14365.0	30868.7	-1.70353	1.45e-09	sp_P70079_KCRU_CHICK_Creatine_kinase_U-type,_mitochondrial_OS=Gallus_gallus_OX=9031_GN=CKMT1_PE=1_SV=1
Cluster-3.12428	912.395	1.28435	1.45e-09
Cluster-3.6074	941.748	-1.13948	1.46e-09	sp_Q9Y5R8_TPPC1_HUMAN_Trafficking_protein_particle_complex_subunit_1_OS=Homo_sapiens_OX=9606_GN=TRAPPC1_PE=1_SV=1
Cluster-3.12512	2548.52	-1.90044	1.47e-09	sp_Q60648_SAP3_MOUSE_Ganglioside_GM2_activator_OS=Mus_musculus_OX=10090_GN=Gm2a_PE=1_SV=2
Cluster-13011.1	1490.49	-1.967	1.47e-09	sp_P04066_FUCO_HUMAN_Tissue_alpha-L-fucosidase_OS=Homo_sapiens_OX=9606_GN=FUCA1_PE=1_SV=4
Cluster-3.11428	314.392	1.48135	1.47e-09	sp_O00370_LORF2_HUMAN_LINE-1_retrotransposable_element_ORF2_protein_OS=Homo_sapiens_OX=9606_PE=1_SV=1
Cluster-3.1469	42235.5	-1.69365	1.47e-09	sp_P62156_CALM_ONCSP_Calmodulin_OS=Oncorhynchus_sp._OX=8025_GN=calm_PE=1_SV=2
Cluster-8050.0	523.321	-1.48127	1.5e-09	sp_P35623_GLYC_SHEEP_Serine_hydroxymethyltransferase,_cytosolic_OS=Ovis_aries_OX=9940_GN=SHMT1_PE=1_SV=3
Cluster-4959.0	80.8673	-2.42631	1.51e-09	sp_P57729_RAB38_HUMAN_Ras-related_protein_Rab-38_OS=Homo_sapiens_OX=9606_GN=RAB38_PE=1_SV=1
Cluster-4462.2	4680.6	1.02871	1.51e-09	sp_P30009_MARCS_RAT_Myristoylated_alanine-rich_C-kinase_substrate_OS=Rattus_norvegicus_OX=10116_GN=Marcks_PE=1_SV=2
Cluster-3.5234	76.3832	1.68954	1.53e-09
Cluster-3.9199	53.8115	1.97333	1.53e-09
Cluster-7530.0	3902.81	-1.41509	1.54e-09	sp_Q5DTL9_S4A10_MOUSE_Sodium-driven_chloride_bicarbonate_exchanger_OS=Mus_musculus_OX=10090_GN=Slc4a10_PE=1_SV=2
Cluster-9452.0	3895.14	-1.63725	1.55e-09	sp_P11884_ALDH2_RAT_Aldehyde_dehydrogenase,_mitochondrial_OS=Rattus_norvegicus_OX=10116_GN=Aldh2_PE=1_SV=1
Cluster-3760.0	363.295	-2.60174	1.57e-09	sp_Q16698_DECR_HUMAN_2,4-dienoyl-CoA_reductase,_mitochondrial_OS=Homo_sapiens_OX=9606_GN=DECR1_PE=1_SV=1
Cluster-3.2246	1869.65	-2.61686	1.58e-09	sp_Q9DGI3_THIO_ICTPU_Thioredoxin_OS=Ictalurus_punctatus_OX=7998_GN=txn_PE=3_SV=1
Cluster-905.0	654.365	-2.70331	1.6e-09	sp_Q6J3Q7_COX17_CANLF_Cytochrome_c_oxidase_copper_chaperone_OS=Canis_lupus_familiaris_OX=9615_GN=COX17_PE=3_SV=3
Cluster-3.4647	808.615	-2.03836	1.62e-09	sp_Q9QZA0_CAH5B_MOUSE_Carbonic_anhydrase_5B,_mitochondrial_OS=Mus_musculus_OX=10090_GN=Ca5b_PE=1_SV=2
Cluster-3.8632	2250.8	-1.12879	1.62e-09
Cluster-3.863	4406.9	-1.72994	1.63e-09	sp_Q9UGP8_SEC63_HUMAN_Translocation_protein_SEC63_homolog_OS=Homo_sapiens_OX=9606_GN=SEC63_PE=1_SV=2
Cluster-15517.0	4534.71	-2.42963	1.66e-09	sp_Q9GM50_UCHL1_HORSE_Ubiquitin_carboxyl-terminal_hydrolase_isozyme_L1_OS=Equus_caballus_OX=9796_GN=UCHL1_PE=2_SV=2
Cluster-11517.1	3826.73	-1.60004	1.67e-09	sp_Q5ZML9_SETD3_CHICK_Histone-lysine_N-methyltransferase_setd3_OS=Gallus_gallus_OX=9031_GN=SETD3_PE=2_SV=1
Cluster-96.0	74.5648	1.44719	1.67e-09
Cluster-15655.1	171.025	1.01213	1.69e-09	sp_Q3UFB2_BCD1_MOUSE_Box_C/D_snoRNA_protein_1_OS=Mus_musculus_OX=10090_GN=Znhit6_PE=1_SV=2
Cluster-4283.0	108.554	-2.59704	1.69e-09	sp_Q924T3_XRCC4_MOUSE_DNA_repair_protein_XRCC4_OS=Mus_musculus_OX=10090_GN=Xrcc4_PE=1_SV=1
Cluster-15127.0	1818.79	-1.81886	1.7e-09	sp_Q6IQS9_RM23_DANRE_39S_ribosomal_protein_L23,_mitochondrial_OS=Danio_rerio_OX=7955_GN=mrpl23_PE=2_SV=1
Cluster-3.12643	832.75	-1.51521	1.7e-09	sp_Q0IH40_DNLZ_XENLA_DNL-type_zinc_finger_protein_OS=Xenopus_laevis_OX=8355_GN=dnlz_PE=2_SV=1
Cluster-3.8139	2286.93	-2.40806	1.71e-09	sp_Q9H098_F107B_HUMAN_Protein_FAM107B_OS=Homo_sapiens_OX=9606_GN=FAM107B_PE=1_SV=1
Cluster-1273.0	832.356	-1.30415	1.77e-09	sp_Q8N4L2_PP4P2_HUMAN_Type_2_phosphatidylinositol_4,5-bisphosphate_4-phosphatase_OS=Homo_sapiens_OX=9606_GN=PIP4P2_PE=1_SV=1
Cluster-3.11907	2028.61	-1.3128	1.78e-09	sp_Q9YH18_QKI_CHICK_Protein_quaking_OS=Gallus_gallus_OX=9031_GN=QKI_PE=2_SV=2
Cluster-4130.0	1157.23	1.45703	1.78e-09	sp_Q9Y4A5_TRRAP_HUMAN_Transformation/transcription_domain-associated_protein_OS=Homo_sapiens_OX=9606_GN=TRRAP_PE=1_SV=3
Cluster-3.881	1275	-2.00393	1.8e-09	sp_F1N476_ECE2_BOVIN_Endothelin-converting_enzyme_2_OS=Bos_taurus_OX=9913_GN=ECE2_PE=2_SV=1
Cluster-3.466	681.289	1.31807	1.8e-09
Cluster-14856.0	733.499	1.31488	1.8e-09	sp_Q5U5Q3_MEX3C_HUMAN_RNA-binding_E3_ubiquitin-protein_ligase_MEX3C_OS=Homo_sapiens_OX=9606_GN=MEX3C_PE=1_SV=3
Cluster-3.4195	2223.7	-2.5538	1.84e-09	sp_Q6P7Q4_LGUL_RAT_Lactoylglutathione_lyase_OS=Rattus_norvegicus_OX=10116_GN=Glo1_PE=1_SV=3
Cluster-3.8089	5328.26	-1.83486	1.85e-09	sp_Q9H2D1_MFTC_HUMAN_Mitochondrial_folate_transporter/carrier_OS=Homo_sapiens_OX=9606_GN=SLC25A32_PE=1_SV=2
Cluster-7444.0	367.232	2.19765	1.85e-09	sp_Q5R7F5_SEM6D_PONAB_Semaphorin-6D_OS=Pongo_abelii_OX=9601_GN=SEMA6D_PE=2_SV=1
Cluster-3.12034	8443.22	-2.24408	1.86e-09	sp_P13696_PEBP1_BOVIN_Phosphatidylethanolamine-binding_protein_1_OS=Bos_taurus_OX=9913_GN=PEBP1_PE=1_SV=2
Cluster-9902.1	8679.27	-2.26503	1.89e-09	sp_Q5U3Q6_CIP4_DANRE_Cdc42-interacting_protein_4_homolog_OS=Danio_rerio_OX=7955_GN=trip10_PE=2_SV=1
Cluster-4371.0	445.383	1.67941	1.92e-09
Cluster-3.12504	954.909	1.10316	1.92e-09
Cluster-3.4552	4337.67	-2.26185	1.94e-09	sp_P52505_ACPM_BOVIN_Acyl_carrier_protein,_mitochondrial_OS=Bos_taurus_OX=9913_GN=NDUFAB1_PE=1_SV=2
Cluster-4715.1	1387.04	1.49046	1.94e-09	sp_A7Z019_SMCA4_BOVIN_Transcription_activator_BRG1_OS=Bos_taurus_OX=9913_GN=SMARCA4_PE=2_SV=1
Cluster-3.4810	84.0636	1.94764	1.95e-09
Cluster-3.3893	326.403	1.07963	1.96e-09
Cluster-13929.0	267.363	-2.0927	1.96e-09	sp_Q8TDB6_DTX3L_HUMAN_E3_ubiquitin-protein_ligase_DTX3L_OS=Homo_sapiens_OX=9606_GN=DTX3L_PE=1_SV=1
Cluster-3.11301	3765.27	-2.49006	1.99e-09	sp_P60522_GBRL2_RAT_Gamma-aminobutyric_acid_receptor-associated_protein-like_2_OS=Rattus_norvegicus_OX=10116_GN=Gabarapl2_PE=3_SV=1
Cluster-13469.0	851.666	-2.03627	2e-09	sp_P83468_PHP14_RABIT_14_kDa_phosphohistidine_phosphatase_OS=Oryctolagus_cuniculus_OX=9986_GN=PHPT1_PE=1_SV=1
Cluster-3.2391	199.723	1.60365	2.03e-09
Cluster-14961.0	769.896	-1.71366	2.07e-09	sp_Q9UL46_PSME2_HUMAN_Proteasome_activator_complex_subunit_2_OS=Homo_sapiens_OX=9606_GN=PSME2_PE=1_SV=4
Cluster-15047.0	240.01	-1.93315	2.09e-09	sp_P51174_ACADL_MOUSE_Long-chain_specific_acyl-CoA_dehydrogenase,_mitochondrial_OS=Mus_musculus_OX=10090_GN=Acadl_PE=1_SV=2
Cluster-15267.0	7170.69	-1.7633	2.09e-09	sp_Q24K02_IDE_BOVIN_Insulin-degrading_enzyme_OS=Bos_taurus_OX=9913_GN=IDE_PE=2_SV=1
Cluster-5405.0	745.015	-2.32481	2.09e-09	sp_P49842_STK19_HUMAN_Serine/threonine-protein_kinase_19_OS=Homo_sapiens_OX=9606_GN=STK19_PE=1_SV=2
Cluster-10798.0	2158.84	-2.09548	2.1e-09	sp_Q6IQ86_BRK1_DANRE_Probable_protein_BRICK1_OS=Danio_rerio_OX=7955_GN=brk1_PE=3_SV=1
Cluster-3.2108	351.926	1.07211	2.12e-09
Cluster-7555.0	88.44	-2.22166	2.13e-09	sp_P45877_PPIC_HUMAN_Peptidyl-prolyl_cis-trans_isomerase_C_OS=Homo_sapiens_OX=9606_GN=PPIC_PE=1_SV=1
Cluster-926.0	15305.1	-2.67653	2.15e-09	sp_Q9C010_IPKB_HUMAN_cAMP-dependent_protein_kinase_inhibitor_beta_OS=Homo_sapiens_OX=9606_GN=PKIB_PE=3_SV=1
Cluster-3.2084	673.305	-2.38403	2.15e-09	sp_Q5XI22_THIC_RAT_Acetyl-CoA_acetyltransferase,_cytosolic_OS=Rattus_norvegicus_OX=10116_GN=Acat2_PE=1_SV=1
Cluster-16229.0	207.301	-2.27243	2.24e-09	sp_Q8BNQ3_G137B_MOUSE_Integral_membrane_protein_GPR137B_OS=Mus_musculus_OX=10090_GN=Gpr137b_PE=2_SV=2
Cluster-5986.0	342.206	1.25776	2.26e-09
Cluster-3.8833	100.961	1.16036	2.27e-09
Cluster-16157.0	125.546	1.63291	2.31e-09
Cluster-1877.0	635.76	-1.5817	2.34e-09	sp_P33124_ACSL6_RAT_Long-chain-fatty-acid--CoA_ligase_6_OS=Rattus_norvegicus_OX=10116_GN=Acsl6_PE=1_SV=1
Cluster-3.11175	2422.89	-2.1219	2.34e-09	sp_O35400_ST2B1_MOUSE_Sulfotransferase_family_cytosolic_2B_member_1_OS=Mus_musculus_OX=10090_GN=Sult2b1_PE=2_SV=2
Cluster-15053.0	913.185	-2.27754	2.4e-09
Cluster-5253.0	535.71	1.72952	2.4e-09	sp_P51826_AFF3_HUMAN_AF4/FMR2_family_member_3_OS=Homo_sapiens_OX=9606_GN=AFF3_PE=1_SV=2
Cluster-13655.0	74.3157	-2.72204	2.46e-09	sp_Q8N0X2_SPG16_HUMAN_Sperm-associated_antigen_16_protein_OS=Homo_sapiens_OX=9606_GN=SPAG16_PE=2_SV=2
Cluster-1426.0	17285.8	-2.50943	2.46e-09	sp_O96001_PPR17_HUMAN_Protein_phosphatase_1_regulatory_subunit_17_OS=Homo_sapiens_OX=9606_GN=PPP1R17_PE=1_SV=2
Cluster-3.6261	76.6645	1.75197	2.46e-09
Cluster-3.7548	568.916	-2.1036	2.46e-09	sp_Q5U3Y5_SFT2A_RAT_Vesicle_transport_protein_SFT2A_OS=Rattus_norvegicus_OX=10116_GN=Sft2d1_PE=2_SV=1
Cluster-3.13294	69.1127	1.46896	2.48e-09
Cluster-5096.0	1831.11	-2.37077	2.49e-09	sp_Q15527_SURF2_HUMAN_Surfeit_locus_protein_2_OS=Homo_sapiens_OX=9606_GN=SURF2_PE=1_SV=3
Cluster-3.1869	103.857	-1.55247	2.51e-09
Cluster-3.10457	3186.59	-2.46088	2.52e-09	sp_Q0MQD2_NDUB3_PANTR_NADH_dehydrogenase_[ubiquinone]_1_beta_subcomplex_subunit_3_OS=Pan_troglodytes_OX=9598_GN=NDUFB3_PE=3_SV=3
Cluster-3.657	247.198	1.73103	2.54e-09
Cluster-8464.1	505.817	-1.82094	2.55e-09
Cluster-13074.0	2517.15	-2.01536	2.55e-09	sp_Q8WTS1_ABHD5_HUMAN_1-acylglycerol-3-phosphate_O-acyltransferase_ABHD5_OS=Homo_sapiens_OX=9606_GN=ABHD5_PE=1_SV=1
Cluster-10609.0	80.045	-1.80468	2.56e-09	sp_Q8NFH8_REPS2_HUMAN_RalBP1-associated_Eps_domain-containing_protein_2_OS=Homo_sapiens_OX=9606_GN=REPS2_PE=1_SV=2
Cluster-16117.0	2704.96	-1.66023	2.56e-09	sp_Q5BJW3_TX261_RAT_Protein_TEX261_OS=Rattus_norvegicus_OX=10116_GN=Tex261_PE=2_SV=1
Cluster-3.7074	707.262	-2.04769	2.57e-09	sp_Q9JHW0_PSB7_RAT_Proteasome_subunit_beta_type-7_OS=Rattus_norvegicus_OX=10116_GN=Psmb7_PE=1_SV=1
Cluster-2553.0	468.542	-2.01852	2.57e-09	sp_A5D8S0_KIZ_DANRE_Centrosomal_protein_kizuna_OS=Danio_rerio_OX=7955_GN=kiz_PE=2_SV=1
Cluster-3.6576	56.4153	1.8631	2.57e-09
Cluster-472.0	141.429	-2.19476	2.58e-09
Cluster-3.177	2256.73	-1.98713	2.58e-09
Cluster-15503.0	144.895	-2.43159	2.58e-09	sp_Q8BJN4_FNDC9_MOUSE_Fibronectin_type_III_domain-containing_protein_9_OS=Mus_musculus_OX=10090_GN=Fndc9_PE=2_SV=1
Cluster-7436.0	807.205	-1.04994	2.64e-09	sp_Q6NS57_MABP1_MOUSE_Mitogen-activated_protein_kinase-binding_protein_1_OS=Mus_musculus_OX=10090_GN=Mapkbp1_PE=1_SV=1
Cluster-3.6318	10242.1	-1.82879	2.65e-09	sp_Q9PUE4_COPG2_DANRE_Coatomer_subunit_gamma-2_OS=Danio_rerio_OX=7955_GN=copg2_PE=2_SV=2
Cluster-3.2227	2503.37	-1.34518	2.65e-09	sp_Q7ZWE9_KCY_DANRE_UMP-CMP_kinase_OS=Danio_rerio_OX=7955_GN=cmpk_PE=2_SV=2
Cluster-3.12561	614.464	-1.36819	2.66e-09	sp_Q3UVU3_ZNT10_MOUSE_Zinc_transporter_10_OS=Mus_musculus_OX=10090_GN=Slc30a10_PE=1_SV=1
Cluster-13082.0	3252.23	-1.16532	2.67e-09	sp_Q6NWG0_TSN36_DANRE_Tetraspanin-36_OS=Danio_rerio_OX=7955_GN=tspan36_PE=1_SV=2
Cluster-3.4337	5395.82	-2.09443	2.67e-09	sp_Q66I61_CX056_DANRE_UPF0428_protein_CXorf56_homolog_OS=Danio_rerio_OX=7955_GN=zgc:103697_PE=2_SV=1
Cluster-13251.0	757.759	-1.23331	2.67e-09	sp_Q8TCT8_SPP2A_HUMAN_Signal_peptide_peptidase-like_2A_OS=Homo_sapiens_OX=9606_GN=SPPL2A_PE=1_SV=2
Cluster-3300.0	540.298	-1.155	2.7e-09
Cluster-15933.1	1165.26	-1.94858	2.72e-09	sp_Q5ZIA2_MAP7_CHICK_Ensconsin_OS=Gallus_gallus_OX=9031_GN=MAP7_PE=2_SV=1
Cluster-3.11190	2000.21	-1.59386	2.72e-09	sp_Q2KI19_GPT11_BOVIN_G_patch_domain-containing_protein_11_OS=Bos_taurus_OX=9913_GN=GPATCH11_PE=2_SV=2
Cluster-10573.0	67.7776	-2.94416	2.72e-09	sp_Q9DAK2_PACRG_MOUSE_Parkin_coregulated_gene_protein_homolog_OS=Mus_musculus_OX=10090_GN=Pacrg_PE=1_SV=1
Cluster-15933.0	3808.82	-2.11304	2.73e-09	sp_Q5ZIA2_MAP7_CHICK_Ensconsin_OS=Gallus_gallus_OX=9031_GN=MAP7_PE=2_SV=1
Cluster-3.325	650.803	-1.75715	2.74e-09	sp_Q28651_2A5G_RABIT_Serine/threonine-protein_phosphatase_2A_56_kDa_regulatory_subunit_gamma_isoform_OS=Oryctolagus_cuniculus_OX=9986_GN=PPP2R5C_PE=2_SV=1
Cluster-3.8171	110.84	1.20695	2.74e-09
Cluster-13189.0	6320.49	-1.43495	2.74e-09	sp_B3F209_BHE40_SHEEP_Class_E_basic_helix-loop-helix_protein_40_OS=Ovis_aries_OX=9940_GN=BHLHE40_PE=2_SV=1
Cluster-8244.0	3721.94	-2.16653	2.75e-09	sp_P41732_TSN7_HUMAN_Tetraspanin-7_OS=Homo_sapiens_OX=9606_GN=TSPAN7_PE=1_SV=2
Cluster-3.6638	194.579	2.04896	2.76e-09
Cluster-9593.0	9474.14	-1.44537	2.81e-09	sp_Q5ZK62_ACAP2_CHICK_Arf-GAP_with_coiled-coil,_ANK_repeat_and_PH_domain-containing_protein_2_OS=Gallus_gallus_OX=9031_GN=ACAP2_PE=2_SV=1
Cluster-12124.0	80.7481	-3.59346	2.81e-09
Cluster-3.3781	442.004	1.98021	2.81e-09	sp_Q96MB7_HARB1_HUMAN_Putative_nuclease_HARBI1_OS=Homo_sapiens_OX=9606_GN=HARBI1_PE=1_SV=1
Cluster-9213.0	3922.28	-2.16447	2.88e-09	sp_Q8IVF5_TIAM2_HUMAN_T-lymphoma_invasion_and_metastasis-inducing_protein_2_OS=Homo_sapiens_OX=9606_GN=TIAM2_PE=2_SV=4
Cluster-14208.0	7641.55	-2.2192	2.91e-09	sp_Q9GL24_CATL1_CANLF_Cathepsin_L1_OS=Canis_lupus_familiaris_OX=9615_GN=CTSL_PE=2_SV=1
Cluster-3.10775	310.632	-2.10635	2.91e-09	sp_Q3TLP5_ECHD2_MOUSE_Enoyl-CoA_hydratase_domain-containing_protein_2,_mitochondrial_OS=Mus_musculus_OX=10090_GN=Echdc2_PE=1_SV=2
Cluster-3.6915	235.09	-2.14912	2.95e-09
Cluster-3.7061	124.793	2.30064	2.95e-09	sp_O55074_AKA7A_MOUSE_A-kinase_anchor_protein_7_isoform_alpha_OS=Mus_musculus_OX=10090_GN=Akap7_PE=1_SV=4
Cluster-7760.0	581.122	-1.96231	2.98e-09	sp_Q6TCH4_PAQR6_HUMAN_Membrane_progestin_receptor_delta_OS=Homo_sapiens_OX=9606_GN=PAQR6_PE=1_SV=2
Cluster-15128.0	339.129	-1.51398	3.08e-09	sp_Q9NP56_PDE7B_HUMAN_cAMP-specific_3',5'-cyclic_phosphodiesterase_7B_OS=Homo_sapiens_OX=9606_GN=PDE7B_PE=1_SV=1
Cluster-7105.0	1579.33	-1.60657	3.08e-09
Cluster-3.5759	16297	-1.71972	3.12e-09	sp_Q8N475_FSTL5_HUMAN_Follistatin-related_protein_5_OS=Homo_sapiens_OX=9606_GN=FSTL5_PE=2_SV=2
Cluster-9851.0	2472.93	-1.79597	3.12e-09	sp_O08914_FAAH1_MOUSE_Fatty-acid_amide_hydrolase_1_OS=Mus_musculus_OX=10090_GN=Faah_PE=1_SV=1
Cluster-16101.0	96.63	1.96221	3.13e-09
Cluster-12399.0	151.945	-1.66888	3.14e-09	sp_P70275_SEM3E_MOUSE_Semaphorin-3E_OS=Mus_musculus_OX=10090_GN=Sema3e_PE=1_SV=3
Cluster-14533.0	432.437	-2.63527	3.14e-09	sp_O89106_FHIT_MOUSE_Bis(5'-adenosyl)-triphosphatase_OS=Mus_musculus_OX=10090_GN=Fhit_PE=1_SV=3
Cluster-11236.0	5847.15	-2.11718	3.15e-09	sp_Q0IIF6_FAIM1_BOVIN_Fas_apoptotic_inhibitory_molecule_1_OS=Bos_taurus_OX=9913_GN=FAIM_PE=2_SV=1
Cluster-12128.0	62.6234	2.17829	3.16e-09	sp_Q8VBW6_ULA1_MOUSE_NEDD8-activating_enzyme_E1_regulatory_subunit_OS=Mus_musculus_OX=10090_GN=Nae1_PE=1_SV=1
Cluster-3.11469	4678.29	-2.24637	3.2e-09	sp_P55006_RDH7_RAT_Retinol_dehydrogenase_7_OS=Rattus_norvegicus_OX=10116_GN=Rdh7_PE=1_SV=1
Cluster-3.11547	66.7389	-2.05705	3.28e-09	sp_Q5RFG2_BHMT1_PONAB_Betaine--homocysteine_S-methyltransferase_1_OS=Pongo_abelii_OX=9601_GN=BHMT_PE=2_SV=1
Cluster-3.4466	1384.73	-1.13566	3.28e-09	sp_Q9ULW5_RAB26_HUMAN_Ras-related_protein_Rab-26_OS=Homo_sapiens_OX=9606_GN=RAB26_PE=1_SV=3
Cluster-14858.0	12157.6	-2.35458	3.3e-09	sp_Q6DIY9_MDHC_XENTR_Malate_dehydrogenase,_cytoplasmic_OS=Xenopus_tropicalis_OX=8364_GN=mdh1_PE=2_SV=1
Cluster-3.9778	64.2265	-2.20092	3.31e-09
Cluster-8994.0	725.963	-1.58391	3.31e-09	sp_Q9H6X5_CS044_HUMAN_Uncharacterized_protein_C19orf44_OS=Homo_sapiens_OX=9606_GN=C19orf44_PE=1_SV=1
Cluster-3.4201	4739.23	-1.73436	3.32e-09	sp_A8KBE0_OXR1_XENTR_Oxidation_resistance_protein_1_OS=Xenopus_tropicalis_OX=8364_GN=oxr1_PE=2_SV=2
Cluster-4620.0	3408.84	-1.75829	3.32e-09	sp_D0VWV4_C560_PIG_Succinate_dehydrogenase_cytochrome_b560_subunit,_mitochondrial_OS=Sus_scrofa_OX=9823_GN=SDHC_PE=1_SV=2
Cluster-3.4376	580.57	1.58286	3.36e-09
Cluster-3.10117	2936.74	-1.68397	3.38e-09	sp_P62877_RBX1_HUMAN_E3_ubiquitin-protein_ligase_RBX1_OS=Homo_sapiens_OX=9606_GN=RBX1_PE=1_SV=1
Cluster-240.0	905.369	-2.44446	3.4e-09	sp_Q9D1A2_CNDP2_MOUSE_Cytosolic_non-specific_dipeptidase_OS=Mus_musculus_OX=10090_GN=Cndp2_PE=1_SV=1
Cluster-1815.0	262.931	-1.02323	3.41e-09	sp_Q8N5M4_TTC9C_HUMAN_Tetratricopeptide_repeat_protein_9C_OS=Homo_sapiens_OX=9606_GN=TTC9C_PE=1_SV=1
Cluster-15502.0	3066.82	-1.42611	3.47e-09	sp_Q8CFV9_RIFK_MOUSE_Riboflavin_kinase_OS=Mus_musculus_OX=10090_GN=Rfk_PE=1_SV=2
Cluster-3.9894	330.342	1.66909	3.47e-09
Cluster-8956.0	7050.18	-1.26403	3.47e-09	sp_Q5R5K5_AT2C1_PONAB_Calcium-transporting_ATPase_type_2C_member_1_OS=Pongo_abelii_OX=9601_GN=ATP2C1_PE=2_SV=1
Cluster-3.10595	209.185	2.01198	3.5e-09	sp_Q5HZL4_PAF15_XENLA_PCNA-associated_factor_OS=Xenopus_laevis_OX=8355_GN=pclaf_PE=2_SV=1
Cluster-8552.0	3264.33	-2.29316	3.5e-09	sp_O14548_COX7R_HUMAN_Cytochrome_c_oxidase_subunit_7A-related_protein,_mitochondrial_OS=Homo_sapiens_OX=9606_GN=COX7A2L_PE=1_SV=2
Cluster-3.3644	558.266	1.23583	3.53e-09
Cluster-6956.2	4999.25	-1.54774	3.53e-09	sp_Q3ZBT2_FBX9_BOVIN_F-box_only_protein_9_OS=Bos_taurus_OX=9913_GN=FBXO9_PE=2_SV=2
Cluster-3.9662	673.056	-2.21003	3.54e-09	sp_Q8BKV0_TICN3_MOUSE_Testican-3_OS=Mus_musculus_OX=10090_GN=Spock3_PE=2_SV=2
Cluster-10314.0	59.017	-3.28698	3.56e-09	sp_Q68FU1_PKHF1_RAT_Pleckstrin_homology_domain-containing_family_F_member_1_OS=Rattus_norvegicus_OX=10116_GN=Plekhf1_PE=2_SV=1
Cluster-10011.0	76.2584	-2.25035	3.62e-09	sp_Q66J54_S226A_XENLA_Solute_carrier_family_22_member_6-A_OS=Xenopus_laevis_OX=8355_GN=slc22a6-a_PE=2_SV=1
Cluster-14935.0	2258.18	-1.89955	3.64e-09	sp_Q5M9P8_ARL6_DANRE_ADP-ribosylation_factor-like_protein_6_OS=Danio_rerio_OX=7955_GN=arl6_PE=2_SV=1
Cluster-11853.0	193.571	2.25572	3.64e-09
Cluster-3.3398	1026.71	-2.01293	3.64e-09	sp_Q9CR20_IR3IP_MOUSE_Immediate_early_response_3-interacting_protein_1_OS=Mus_musculus_OX=10090_GN=Ier3ip1_PE=3_SV=1
Cluster-3.9861	114.336	2.06266	3.66e-09	sp_O00370_LORF2_HUMAN_LINE-1_retrotransposable_element_ORF2_protein_OS=Homo_sapiens_OX=9606_PE=1_SV=1
Cluster-10379.0	338.046	-1.74986	3.7e-09	sp_Q5FVB0_ATX10_XENTR_Ataxin-10_OS=Xenopus_tropicalis_OX=8364_GN=atxn10_PE=2_SV=1
Cluster-16744.1	814.972	-1.54043	3.73e-09	sp_Q9CQ00_DMAC1_MOUSE_Distal_membrane-arm_assembly_complex_protein_1_OS=Mus_musculus_OX=10090_GN=Dmac1_PE=1_SV=1
Cluster-3.2545	177.605	-1.30427	3.75e-09
Cluster-3.9241	9402.55	-1.95911	3.79e-09	sp_Q3T0Q6_CNBP_BOVIN_Cellular_nucleic_acid-binding_protein_OS=Bos_taurus_OX=9913_GN=CNBP_PE=2_SV=1
Cluster-3.2106	628.793	-1.78496	3.84e-09	sp_Q9D0A3_ARPIN_MOUSE_Arpin_OS=Mus_musculus_OX=10090_GN=Arpin_PE=1_SV=1
Cluster-3.7989	504.126	-2.96763	3.86e-09	sp_A7YD35_IOD3_SPAAU_Thyroxine_5-deiodinase_OS=Sparus_aurata_OX=8175_GN=dio3_PE=2_SV=2
Cluster-6163.0	58.7988	-2.1336	3.88e-09
Cluster-16635.0	173.434	-2.11959	3.88e-09
Cluster-3.6703	186.407	-1.04438	3.88e-09
Cluster-3.6279	281.648	1.44792	3.88e-09
Cluster-13488.1	4173.96	-1.72664	3.89e-09	sp_Q9D1L0_CHCH2_MOUSE_Coiled-coil-helix-coiled-coil-helix_domain-containing_protein_2_OS=Mus_musculus_OX=10090_GN=Chchd2_PE=2_SV=1
Cluster-11259.0	137.901	1.30586	3.95e-09
Cluster-3.4820	700.906	-1.50078	3.95e-09	sp_Q9D924_ISCA1_MOUSE_Iron-sulfur_cluster_assembly_1_homolog,_mitochondrial_OS=Mus_musculus_OX=10090_GN=Isca1_PE=2_SV=1
Cluster-13259.0	533.53	-1.48144	3.96e-09
Cluster-3.12059	1294.5	-2.31803	3.99e-09	sp_J7FQE8_CYTB_OPLFA_Cystatin-B_OS=Oplegnathus_fasciatus_OX=163134_PE=2_SV=1
Cluster-9551.0	112.674	-2.32985	4.03e-09	sp_Q502D1_GLOD5_DANRE_Glyoxalase_domain-containing_protein_5_OS=Danio_rerio_OX=7955_GN=glod5_PE=2_SV=1
Cluster-1838.0	7467.93	-1.62278	4.04e-09	sp_O00423_EMAL1_HUMAN_Echinoderm_microtubule-associated_protein-like_1_OS=Homo_sapiens_OX=9606_GN=EML1_PE=1_SV=3
Cluster-3.1510	6075.41	-2.29174	4.07e-09	sp_P34943_NDUA9_BOVIN_NADH_dehydrogenase_[ubiquinone]_1_alpha_subcomplex_subunit_9,_mitochondrial_OS=Bos_taurus_OX=9913_GN=NDUFA9_PE=1_SV=1
Cluster-3.12227	1429.17	-1.89975	4.09e-09	sp_Q96H20_SNF8_HUMAN_Vacuolar-sorting_protein_SNF8_OS=Homo_sapiens_OX=9606_GN=SNF8_PE=1_SV=1
Cluster-3.5829	536.001	-2.4121	4.09e-09	sp_Q91431_NF7O_XENLA_Nuclear_factor_7,_ovary_OS=Xenopus_laevis_OX=8355_PE=2_SV=1
Cluster-12029.0	280.207	-2.94173	4.1e-09	sp_Q8IZP9_AGRG2_HUMAN_Adhesion_G-protein_coupled_receptor_G2_OS=Homo_sapiens_OX=9606_GN=ADGRG2_PE=1_SV=2
Cluster-3.8434	2578.97	-2.19289	4.1e-09	sp_Q5SWX8_ODR4_HUMAN_Protein_odr-4_homolog_OS=Homo_sapiens_OX=9606_GN=ODR4_PE=1_SV=1
Cluster-3.9253	22991.7	-1.36063	4.1e-09	sp_Q28618_YBOX1_RABIT_Nuclease-sensitive_element-binding_protein_1_OS=Oryctolagus_cuniculus_OX=9986_GN=YBX1_PE=1_SV=3
Cluster-3942.0	1572.04	-1.41052	4.1e-09
Cluster-10493.0	497.587	-1.62582	4.12e-09	sp_Q5VTY9_HHAT_HUMAN_Protein-cysteine_N-palmitoyltransferase_HHAT_OS=Homo_sapiens_OX=9606_GN=HHAT_PE=1_SV=1
Cluster-3.9939	818.241	-1.43645	4.17e-09	sp_O75381_PEX14_HUMAN_Peroxisomal_membrane_protein_PEX14_OS=Homo_sapiens_OX=9606_GN=PEX14_PE=1_SV=1
Cluster-16530.0	1012.56	1.04592	4.21e-09	sp_Q9Y4B6_DCAF1_HUMAN_DDB1-_and_CUL4-associated_factor_1_OS=Homo_sapiens_OX=9606_GN=DCAF1_PE=1_SV=3
Cluster-3196.0	276.337	-1.80811	4.21e-09
Cluster-13458.0	342.805	1.45792	4.3e-09
Cluster-6410.4	4004.4	-1.25224	4.31e-09	sp_Q6AYU4_EGLN2_RAT_Egl_nine_homolog_2_OS=Rattus_norvegicus_OX=10116_GN=Egln2_PE=2_SV=1
Cluster-3.9759	418.453	-1.80282	4.32e-09
Cluster-444.0	69.6263	1.77537	4.35e-09
Cluster-3.2259	12822.3	-1.89972	4.36e-09	sp_Q13526_PIN1_HUMAN_Peptidyl-prolyl_cis-trans_isomerase_NIMA-interacting_1_OS=Homo_sapiens_OX=9606_GN=PIN1_PE=1_SV=1
Cluster-6243.1	343.125	-2.15814	4.39e-09	sp_A1L2R7_T120A_XENLA_Transmembrane_protein_120A_OS=Xenopus_laevis_OX=8355_GN=tmem120a_PE=2_SV=1
Cluster-15670.1	131.833	1.9447	4.4e-09
Cluster-6785.0	4662.59	-1.52547	4.4e-09	sp_Q9UPZ9_ICK_HUMAN_Serine/threonine-protein_kinase_ICK_OS=Homo_sapiens_OX=9606_GN=ICK_PE=1_SV=1
Cluster-14382.0	50.4019	1.54353	4.46e-09	sp_Q3U3R4_LMF1_MOUSE_Lipase_maturation_factor_1_OS=Mus_musculus_OX=10090_GN=Lmf1_PE=1_SV=1
Cluster-6285.0	2717.27	-2.39686	4.47e-09	sp_Q13356_PPIL2_HUMAN_Peptidyl-prolyl_cis-trans_isomerase-like_2_OS=Homo_sapiens_OX=9606_GN=PPIL2_PE=1_SV=1
Cluster-12708.0	50.6015	1.9059	4.57e-09
Cluster-3.5177	149.872	1.16544	4.57e-09
Cluster-285.0	6808.66	-1.51286	4.6e-09	sp_P50540_MXI1_MOUSE_Max-interacting_protein_1_OS=Mus_musculus_OX=10090_GN=Mxi1_PE=1_SV=1
Cluster-4474.0	6732.06	-2.40576	4.61e-09	sp_Q9CQJ8_NDUB9_MOUSE_NADH_dehydrogenase_[ubiquinone]_1_beta_subcomplex_subunit_9_OS=Mus_musculus_OX=10090_GN=Ndufb9_PE=1_SV=3
Cluster-6204.0	96.4879	-1.43514	4.63e-09
Cluster-3.6924	84505.7	-1.60922	4.68e-09	sp_Q9Y5Y0_FLVC1_HUMAN_Feline_leukemia_virus_subgroup_C_receptor-related_protein_1_OS=Homo_sapiens_OX=9606_GN=FLVCR1_PE=1_SV=1
Cluster-3.381	2089.37	-2.20113	4.72e-09	sp_Q5RBQ7_CDO1_PONAB_Cysteine_dioxygenase_type_1_OS=Pongo_abelii_OX=9601_GN=CDO1_PE=2_SV=1
Cluster-842.1	172.221	1.33048	4.74e-09	sp_O60285_NUAK1_HUMAN_NUAK_family_SNF1-like_kinase_1_OS=Homo_sapiens_OX=9606_GN=NUAK1_PE=1_SV=1
Cluster-10064.5	3822.51	-2.04023	4.75e-09	sp_B5FZ84_HPCL1_TAEGU_Hippocalcin-like_protein_1_OS=Taeniopygia_guttata_OX=59729_GN=HPCAL1_PE=2_SV=1
Cluster-3.6027	2056.78	-2.24644	4.75e-09	sp_Q9W719_HPRT_CHICK_Hypoxanthine-guanine_phosphoribosyltransferase_OS=Gallus_gallus_OX=9031_GN=HPRT1_PE=2_SV=1
Cluster-7439.0	63.2115	-3.05456	4.83e-09	sp_Q6AYC4_CAPG_RAT_Macrophage-capping_protein_OS=Rattus_norvegicus_OX=10116_GN=Capg_PE=1_SV=1
Cluster-11982.0	3069.28	-1.90375	4.85e-09	sp_A5PLK2_LHPP_DANRE_Phospholysine_phosphohistidine_inorganic_pyrophosphate_phosphatase_OS=Danio_rerio_OX=7955_GN=lhpp_PE=2_SV=1
Cluster-5786.0	106.674	-1.57839	4.85e-09	sp_Q9CTN4_RHBT3_MOUSE_Rho-related_BTB_domain-containing_protein_3_OS=Mus_musculus_OX=10090_GN=Rhobtb3_PE=2_SV=3
Cluster-2818.0	1854.96	-2.26051	4.94e-09	sp_Q9BVS4_RIOK2_HUMAN_Serine/threonine-protein_kinase_RIO2_OS=Homo_sapiens_OX=9606_GN=RIOK2_PE=1_SV=2
Cluster-5445.0	331.867	1.01373	4.96e-09
Cluster-14841.1	59.5353	-2.58316	4.96e-09
Cluster-3.8502	1194.81	1.92546	4.96e-09
Cluster-16760.1	2543.74	-1.28611	5.03e-09	sp_Q8UW59_PARK7_CHICK_Protein/nucleic_acid_deglycase_DJ-1_OS=Gallus_gallus_OX=9031_GN=PARK7_PE=2_SV=1
Cluster-3.10682	203.444	-1.84637	5.09e-09
Cluster-3.12520	157.593	-1.17535	5.12e-09	sp_Q9C0F3_ZN436_HUMAN_Zinc_finger_protein_436_OS=Homo_sapiens_OX=9606_GN=ZNF436_PE=1_SV=2
Cluster-3.7021	891.201	-1.33913	5.12e-09
Cluster-3.7270	32468.8	-1.22706	5.15e-09	sp_Q9P0K1_ADA22_HUMAN_Disintegrin_and_metalloproteinase_domain-containing_protein_22_OS=Homo_sapiens_OX=9606_GN=ADAM22_PE=1_SV=1
Cluster-2768.0	95.1154	-1.236	5.2e-09
Cluster-2241.0	1813.09	-2.07748	5.2e-09	sp_Q3SYX9_ARPC5_BOVIN_Actin-related_protein_2/3_complex_subunit_5_OS=Bos_taurus_OX=9913_GN=ARPC5_PE=1_SV=3
Cluster-13926.1	538.942	-1.21794	5.22e-09	sp_Q5E9U4_TYW3_BOVIN_tRNA_wybutosine-synthesizing_protein_3_homolog_OS=Bos_taurus_OX=9913_GN=TYW3_PE=2_SV=1
Cluster-3.11327	2753.85	-1.14434	5.28e-09	sp_Q9WUC6_TIMP2_CAVPO_Metalloproteinase_inhibitor_2_OS=Cavia_porcellus_OX=10141_GN=TIMP2_PE=2_SV=1
Cluster-3.11706	281.968	-1.77865	5.29e-09	sp_Q5CZL8_CYBR1_XENTR_Cytochrome_b_reductase_1_OS=Xenopus_tropicalis_OX=8364_GN=cybrd1_PE=2_SV=2
Cluster-14231.0	965.922	-1.44184	5.31e-09	sp_Q6DUZ9_EIPR1_GEKJA_EARP-interacting_protein_homolog_OS=Gekko_japonicus_OX=146911_GN=eipr1_PE=2_SV=1
Cluster-3.4711	1462.1	-1.45639	5.39e-09	sp_Q8BLY1_SMOC1_MOUSE_SPARC-related_modular_calcium-binding_protein_1_OS=Mus_musculus_OX=10090_GN=Smoc1_PE=2_SV=2
Cluster-3.4116	727.869	-2.15828	5.4e-09	sp_Q01205_ODO2_RAT_Dihydrolipoyllysine-residue_succinyltransferase_component_of_2-oxoglutarate_dehydrogenase_complex,_mitochondrial_OS=Rattus_norvegicus_OX=10116_GN=Dlst_PE=1_SV=2
Cluster-3.12835	488.484	-1.65552	5.42e-09	sp_Q9Y6X1_SERP1_HUMAN_Stress-associated_endoplasmic_reticulum_protein_1_OS=Homo_sapiens_OX=9606_GN=SERP1_PE=1_SV=1
Cluster-10769.0	303.936	-1.7573	5.44e-09
Cluster-3.1452	103.298	1.62861	5.48e-09
Cluster-2205.0	101.919	-2.96018	5.48e-09	sp_Q5ZI57_TPPC3_CHICK_Trafficking_protein_particle_complex_subunit_3_OS=Gallus_gallus_OX=9031_GN=TRAPPC3_PE=2_SV=1
Cluster-3.1097	1656.61	1.12235	5.51e-09
Cluster-7881.0	2328.69	-1.27736	5.53e-09	sp_Q5REY0_CSN6_PONAB_COP9_signalosome_complex_subunit_6_OS=Pongo_abelii_OX=9601_GN=COPS6_PE=2_SV=1
Cluster-3.7151	749.383	-1.12854	5.57e-09	sp_O95754_SEM4F_HUMAN_Semaphorin-4F_OS=Homo_sapiens_OX=9606_GN=SEMA4F_PE=2_SV=2
Cluster-8940.1	1801.64	-1.69677	5.72e-09	sp_P35241_RADI_HUMAN_Radixin_OS=Homo_sapiens_OX=9606_GN=RDX_PE=1_SV=1
Cluster-12607.0	452.885	1.82284	5.75e-09	sp_Q5ZMN2_MCM3_CHICK_DNA_replication_licensing_factor_MCM3_OS=Gallus_gallus_OX=9031_GN=MCM3_PE=2_SV=1
Cluster-3.13126	7133.48	-1.99885	5.75e-09	sp_Q01321_NDUA4_BOVIN_Cytochrome_c_oxidase_subunit_NDUFA4_OS=Bos_taurus_OX=9913_GN=NDUFA4_PE=1_SV=1
Cluster-3.10235	1244.93	1.55219	5.79e-09
Cluster-10909.0	3861.01	-1.58371	5.9e-09	sp_Q3URD3_SLMAP_MOUSE_Sarcolemmal_membrane-associated_protein_OS=Mus_musculus_OX=10090_GN=Slmap_PE=1_SV=2
Cluster-15167.2	91.3854	-3.39099	5.91e-09	sp_P04228_HA2D_MOUSE_H-2_class_II_histocompatibility_antigen,_A-D_alpha_chain_OS=Mus_musculus_OX=10090_GN=H2-Aa_PE=1_SV=1
Cluster-3311.0	3053.35	-1.59021	5.93e-09	sp_Q6GLL2_ABH6A_XENLA_Monoacylglycerol_lipase_abhd6-A_OS=Xenopus_laevis_OX=8355_GN=abhd6-a_PE=2_SV=1
Cluster-3.568	1223.69	-1.10655	5.96e-09	sp_Q9QZU7_BODG_RAT_Gamma-butyrobetaine_dioxygenase_OS=Rattus_norvegicus_OX=10116_GN=Bbox1_PE=1_SV=1
Cluster-3.1250	9011.52	-1.73592	6e-09	sp_Q4R945_TTK_MACFA_Dual_specificity_protein_kinase_TTK_OS=Macaca_fascicularis_OX=9541_GN=TTK_PE=2_SV=1
Cluster-3.12403	1868.29	1.21116	6.07e-09
Cluster-3.647	758.713	1.04076	6.08e-09
Cluster-3.492	1514.84	-2.24067	6.13e-09	sp_Q14442_PIGH_HUMAN_Phosphatidylinositol_N-acetylglucosaminyltransferase_subunit_H_OS=Homo_sapiens_OX=9606_GN=PIGH_PE=1_SV=1
Cluster-13457.0	2019.29	-2.26886	6.17e-09	sp_Q9NZ45_CISD1_HUMAN_CDGSH_iron-sulfur_domain-containing_protein_1_OS=Homo_sapiens_OX=9606_GN=CISD1_PE=1_SV=1
Cluster-3.2929	1417.43	-2.20224	6.17e-09	sp_Q99417_MYCBP_HUMAN_c-Myc-binding_protein_OS=Homo_sapiens_OX=9606_GN=MYCBP_PE=1_SV=3
Cluster-3.8137	2238.44	-1.19465	6.17e-09	sp_Q13287_NMI_HUMAN_N-myc-interactor_OS=Homo_sapiens_OX=9606_GN=NMI_PE=1_SV=2
Cluster-3.10440	137.968	1.10039	6.17e-09
Cluster-5030.1	836.842	-2.07884	6.17e-09	sp_P61458_PHS_MOUSE_Pterin-4-alpha-carbinolamine_dehydratase_OS=Mus_musculus_OX=10090_GN=Pcbd1_PE=1_SV=2
Cluster-3.6921	510.084	-1.32442	6.2e-09	sp_Q32KV6_SIL1_BOVIN_Nucleotide_exchange_factor_SIL1_OS=Bos_taurus_OX=9913_GN=SIL1_PE=2_SV=1
Cluster-3.5016	108.2	1.38344	6.22e-09
Cluster-3.800	29766.7	-1.5846	6.22e-09	sp_Q15835_RK_HUMAN_Rhodopsin_kinase_OS=Homo_sapiens_OX=9606_GN=GRK1_PE=1_SV=1
Cluster-11445.0	675.852	1.06526	6.25e-09
Cluster-3.13320	304.237	1.26143	6.32e-09
Cluster-3.4907	273.398	-1.67586	6.33e-09
Cluster-14938.0	218.063	-1.1843	6.33e-09	sp_A2A9Q0_FND10_MOUSE_Fibronectin_type_III_domain-containing_protein_10_OS=Mus_musculus_OX=10090_GN=Fndc10_PE=2_SV=1
Cluster-13245.0	3514.83	-2.13317	6.36e-09	sp_Q5R5F2_COPZ1_PONAB_Coatomer_subunit_zeta-1_OS=Pongo_abelii_OX=9601_GN=COPZ1_PE=2_SV=1
Cluster-3.12062	803.276	-1.10876	6.39e-09	sp_Q9QYP6_AZI2_MOUSE_5-azacytidine-induced_protein_2_OS=Mus_musculus_OX=10090_GN=Azi2_PE=1_SV=1
Cluster-12869.0	164.501	-1.30159	6.4e-09	sp_Q9YHV4_FSTA_DANRE_Follistatin-A_OS=Danio_rerio_OX=7955_GN=fsta_PE=2_SV=2
Cluster-5839.0	326.913	1.35872	6.4e-09	sp_Q8N6T0_TO6BL_HUMAN_Type_2_DNA_topoisomerase_6_subunit_B-like_OS=Homo_sapiens_OX=9606_GN=TOP6BL_PE=2_SV=3
Cluster-9078.0	7530.08	-1.88148	6.42e-09	sp_P23729_IF3T_TETCF_Type_III_intermediate_filament_OS=Tetronarce_californica_OX=7787_PE=2_SV=1
Cluster-3682.0	58.8575	1.77253	6.43e-09
Cluster-7725.0	357.748	-1.71997	6.5e-09	sp_Q63632_S12A4_RAT_Solute_carrier_family_12_member_4_OS=Rattus_norvegicus_OX=10116_GN=Slc12a4_PE=1_SV=1
Cluster-16318.0	4067.47	-1.73396	6.51e-09	sp_P23785_GRN_RAT_Granulins_OS=Rattus_norvegicus_OX=10116_GN=Grn_PE=1_SV=3
Cluster-4626.1	6175.9	-2.3962	6.56e-09	sp_Q5XHH8_COF2_XENLA_Cofilin-2_OS=Xenopus_laevis_OX=8355_GN=cfl2_PE=2_SV=1
Cluster-4502.1	181.101	-1.95024	6.57e-09	sp_Q6YBV0_S36A4_HUMAN_Proton-coupled_amino_acid_transporter_4_OS=Homo_sapiens_OX=9606_GN=SLC36A4_PE=1_SV=1
Cluster-6789.0	3076.3	-1.42363	6.57e-09	sp_Q19S50_STAT3_PIG_Signal_transducer_and_activator_of_transcription_3_OS=Sus_scrofa_OX=9823_GN=STAT3_PE=1_SV=1
Cluster-3217.0	531.595	-1.89007	6.63e-09
Cluster-3.12975	4335.38	-1.61017	6.64e-09	sp_A8KBE0_OXR1_XENTR_Oxidation_resistance_protein_1_OS=Xenopus_tropicalis_OX=8364_GN=oxr1_PE=2_SV=2
Cluster-12893.1	123.43	-1.4891	6.67e-09	sp_A2A3K4_PTPC1_HUMAN_Protein_tyrosine_phosphatase_domain-containing_protein_1_OS=Homo_sapiens_OX=9606_GN=PTPDC1_PE=1_SV=1
Cluster-3.6200	78.4314	-1.62476	6.74e-09
Cluster-1916.0	116.749	-1.25072	6.93e-09	sp_Q15124_PGM5_HUMAN_Phosphoglucomutase-like_protein_5_OS=Homo_sapiens_OX=9606_GN=PGM5_PE=1_SV=2
Cluster-11678.0	1793.82	-1.62338	7.03e-09	sp_P79382_MGST1_PIG_Microsomal_glutathione_S-transferase_1_OS=Sus_scrofa_OX=9823_GN=MGST1_PE=2_SV=3
Cluster-11839.0	173.252	-1.60397	7.03e-09	sp_P29279_CTGF_HUMAN_Connective_tissue_growth_factor_OS=Homo_sapiens_OX=9606_GN=CTGF_PE=1_SV=2
Cluster-3.9304	105.758	1.29248	7.04e-09	sp_Q03237_MYBB_CHICK_Myb-related_protein_B_OS=Gallus_gallus_OX=9031_GN=MYBL2_PE=1_SV=1
Cluster-15082.0	98.9576	2.32606	7.05e-09
Cluster-3.12905	6998.02	-2.31516	7.06e-09	sp_Q6X4M2_SEP15_ONCMY_Selenoprotein_F_OS=Oncorhynchus_mykiss_OX=8022_GN=selenof_PE=2_SV=2
Cluster-3.661	404.511	1.16115	7.08e-09
Cluster-106.0	180.521	-5.52435	7.09e-09	sp_Q8R448_OTOSP_MOUSE_Otospiralin_OS=Mus_musculus_OX=10090_GN=Otos_PE=2_SV=1
Cluster-9648.0	6836.2	-2.37841	7.13e-09	sp_Q7YRU4_MDHC_FELCA_Malate_dehydrogenase,_cytoplasmic_OS=Felis_catus_OX=9685_GN=MDH1_PE=2_SV=3
Cluster-16546.1	248.178	-2.37576	7.13e-09
Cluster-8509.0	298.672	1.03237	7.29e-09
Cluster-10502.0	484.961	-1.56626	7.29e-09	sp_P18460_FGFR3_CHICK_Fibroblast_growth_factor_receptor_3_OS=Gallus_gallus_OX=9031_GN=FGFR3_PE=2_SV=1
Cluster-6173.1	633.708	-1.89536	7.37e-09	sp_Q32L00_ALKB3_BOVIN_Alpha-ketoglutarate-dependent_dioxygenase_alkB_homolog_3_OS=Bos_taurus_OX=9913_GN=ALKBH3_PE=2_SV=1
Cluster-856.0	78.8284	1.53889	7.38e-09	sp_Q5R7V5_PFKAL_PONAB_ATP-dependent_6-phosphofructokinase,_liver_type_OS=Pongo_abelii_OX=9601_GN=PFKL_PE=2_SV=1
Cluster-5291.0	3942.93	-1.89921	7.39e-09	sp_P14604_ECHM_RAT_Enoyl-CoA_hydratase,_mitochondrial_OS=Rattus_norvegicus_OX=10116_GN=Echs1_PE=1_SV=1
Cluster-4584.0	1716.57	-2.05179	7.47e-09	sp_Q8N448_LNX2_HUMAN_Ligand_of_Numb_protein_X_2_OS=Homo_sapiens_OX=9606_GN=LNX2_PE=1_SV=1
Cluster-14344.1	1287.26	-1.66536	7.49e-09	sp_Q9NZ09_UBAP1_HUMAN_Ubiquitin-associated_protein_1_OS=Homo_sapiens_OX=9606_GN=UBAP1_PE=1_SV=1
Cluster-3.9292	518.736	-2.1991	7.62e-09	sp_B5FXA0_ETFR1_TAEGU_Electron_transfer_flavoprotein_regulatory_factor_1_OS=Taeniopygia_guttata_OX=59729_GN=etfrf1_PE=3_SV=1
Cluster-3.3613	26033.4	-1.07862	7.63e-09	sp_Q00589_SC6A6_CANLF_Sodium-_and_chloride-dependent_taurine_transporter_OS=Canis_lupus_familiaris_OX=9615_GN=SLC6A6_PE=1_SV=2
Cluster-3.4710	282.853	1.10728	7.64e-09
Cluster-2340.0	584.587	1.22807	7.65e-09	sp_P51610_HCFC1_HUMAN_Host_cell_factor_1_OS=Homo_sapiens_OX=9606_GN=HCFC1_PE=1_SV=2
Cluster-3.13288	900.247	-1.166	7.7e-09	sp_Q5ZLT5_PKHJ1_CHICK_Pleckstrin_homology_domain-containing_family_J_member_1_OS=Gallus_gallus_OX=9031_GN=PLEKHJ1_PE=2_SV=1
Cluster-15835.0	2933.67	-1.82699	7.85e-09	sp_Q6NVQ1_JAGN1_XENTR_Protein_jagunal_homolog_1_OS=Xenopus_tropicalis_OX=8364_GN=jagn1_PE=2_SV=1
Cluster-11925.0	848.808	1.29591	7.86e-09
Cluster-3.8937	553.47	1.55846	7.87e-09	sp_Q12767_TMM94_HUMAN_Transmembrane_protein_94_OS=Homo_sapiens_OX=9606_GN=TMEM94_PE=1_SV=1
Cluster-3.9617	78.0461	1.84466	7.87e-09	sp_A7MBL8_PKN2_DANRE_Serine/threonine-protein_kinase_N2_OS=Danio_rerio_OX=7955_GN=pkn2_PE=2_SV=1
Cluster-3216.0	573.265	-2.75512	7.91e-09	sp_P15086_CBPB1_HUMAN_Carboxypeptidase_B_OS=Homo_sapiens_OX=9606_GN=CPB1_PE=1_SV=4
Cluster-3.7604	962.218	-1.04073	7.93e-09	sp_Q5ZI05_LMBD1_CHICK_Probable_lysosomal_cobalamin_transporter_OS=Gallus_gallus_OX=9031_GN=LMBRD1_PE=2_SV=1
Cluster-3714.1	69.7284	2.24936	7.94e-09
Cluster-8846.0	1107.97	-1.58957	7.94e-09	sp_Q2TBU8_MED21_BOVIN_Mediator_of_RNA_polymerase_II_transcription_subunit_21_OS=Bos_taurus_OX=9913_GN=MED21_PE=2_SV=1
Cluster-3.12598	208.124	1.85304	7.95e-09
Cluster-3.7435	179.307	1.18289	7.98e-09
Cluster-3.8955	122.404	-3.65739	8.04e-09
Cluster-3.1100	7153.71	-1.88513	8.08e-09	sp_P24032_MLRN_CHICK_Myosin_regulatory_light_chain_2,_smooth_muscle_minor_isoform_OS=Gallus_gallus_OX=9031_PE=2_SV=2
Cluster-3.4977	974.779	1.30298	8.14e-09	sp_P63136_POK25_HUMAN_Endogenous_retrovirus_group_K_member_25_Pol_protein_OS=Homo_sapiens_OX=9606_GN=ERVK-25_PE=3_SV=1
Cluster-3.9483	159.551	-1.68722	8.14e-09	sp_Q6GPN6_SGK1A_XENLA_Serine/threonine-protein_kinase_Sgk1-A_OS=Xenopus_laevis_OX=8355_GN=sgk1-a_PE=2_SV=1
Cluster-3.6240	2625.17	-1.72067	8.16e-09	sp_P13667_PDIA4_HUMAN_Protein_disulfide-isomerase_A4_OS=Homo_sapiens_OX=9606_GN=PDIA4_PE=1_SV=2
Cluster-3.3178	252.248	1.01491	8.29e-09
Cluster-8162.0	450.117	-1.47707	8.29e-09	sp_Q0MQ83_CIA30_GORGO_Complex_I_intermediate-associated_protein_30,_mitochondrial_OS=Gorilla_gorilla_gorilla_OX=9595_GN=NDUFAF1_PE=2_SV=1
Cluster-15957.0	108.479	-2.02634	8.29e-09	sp_Q8NA31_TERB1_HUMAN_Telomere_repeats-binding_bouquet_formation_protein_1_OS=Homo_sapiens_OX=9606_GN=TERB1_PE=1_SV=3
Cluster-14522.1	4393.73	-2.28367	8.32e-09	sp_Q9ERS5_PKHA2_MOUSE_Pleckstrin_homology_domain-containing_family_A_member_2_OS=Mus_musculus_OX=10090_GN=Plekha2_PE=1_SV=1
Cluster-3835.0	23005.9	-1.89885	8.44e-09	sp_P60881_SNP25_RAT_Synaptosomal-associated_protein_25_OS=Rattus_norvegicus_OX=10116_GN=Snap25_PE=1_SV=1
Cluster-10554.1	2990.54	-2.19371	8.46e-09	sp_Q8WVM8_SCFD1_HUMAN_Sec1_family_domain-containing_protein_1_OS=Homo_sapiens_OX=9606_GN=SCFD1_PE=1_SV=4
Cluster-12151.0	53.9182	2.2582	8.55e-09	sp_P13051_UNG_HUMAN_Uracil-DNA_glycosylase_OS=Homo_sapiens_OX=9606_GN=UNG_PE=1_SV=2
Cluster-10731.1	2575.22	-1.01103	8.58e-09	sp_Q4V909_CCD22_DANRE_Coiled-coil_domain-containing_protein_22_OS=Danio_rerio_OX=7955_GN=ccdc22_PE=2_SV=1
Cluster-3.10250	6618.43	-1.73104	8.6e-09	sp_P0DPB3_SCHI1_HUMAN_Schwannomin-interacting_protein_1_OS=Homo_sapiens_OX=9606_GN=SCHIP1_PE=1_SV=1
Cluster-3.2963	1450.25	-1.11992	8.65e-09
Cluster-3.5796	220.783	1.25715	8.67e-09
Cluster-11530.0	6643.68	-1.6303	8.7e-09	sp_Q6PHS6_SNX13_MOUSE_Sorting_nexin-13_OS=Mus_musculus_OX=10090_GN=Snx13_PE=2_SV=1
Cluster-5763.0	60.7756	1.42302	8.7e-09
Cluster-3.2726	225.915	-1.74486	8.71e-09	sp_P52556_BLVRB_BOVIN_Flavin_reductase_(NADPH)_OS=Bos_taurus_OX=9913_GN=BLVRB_PE=1_SV=2
Cluster-12840.0	906.484	-2.30557	8.77e-09	sp_O00186_STXB3_HUMAN_Syntaxin-binding_protein_3_OS=Homo_sapiens_OX=9606_GN=STXBP3_PE=1_SV=2
Cluster-9974.0	89.9908	1.7049	8.8e-09	sp_Q7TS74_CKP2L_MOUSE_Cytoskeleton-associated_protein_2-like_OS=Mus_musculus_OX=10090_GN=Ckap2l_PE=1_SV=1
Cluster-3.8324	163.115	1.61857	8.82e-09
Cluster-3.5671	2411.05	-1.71426	8.83e-09	sp_P62509_ERR3_MOUSE_Estrogen-related_receptor_gamma_OS=Mus_musculus_OX=10090_GN=Esrrg_PE=1_SV=1
Cluster-7662.0	57.1641	2.12869	8.83e-09
Cluster-3.10064	1315.58	-1.678	8.97e-09
Cluster-3.9177	4598.19	-1.80229	9.03e-09	sp_Q5R512_SKP1_PONAB_S-phase_kinase-associated_protein_1_OS=Pongo_abelii_OX=9601_GN=SKP1_PE=2_SV=1
Cluster-3.9707	795.859	1.47612	9.06e-09
Cluster-2323.0	87.015	-2.67951	9.13e-09	sp_A6QP79_COL12_BOVIN_Collectin-12_OS=Bos_taurus_OX=9913_GN=COLEC12_PE=2_SV=1
Cluster-3.9954	652.184	-1.97968	9.17e-09	sp_Q4R6C2_ZN383_MACFA_Zinc_finger_protein_383_OS=Macaca_fascicularis_OX=9541_GN=ZNF383_PE=2_SV=1
Cluster-3.136	685.808	1.25595	9.21e-09
Cluster-2554.0	2199.43	-1.98759	9.27e-09	sp_P31937_3HIDH_HUMAN_3-hydroxyisobutyrate_dehydrogenase,_mitochondrial_OS=Homo_sapiens_OX=9606_GN=HIBADH_PE=1_SV=2
Cluster-8303.1	1829.96	-1.05627	9.27e-09	sp_Q3SZE9_TBCC_BOVIN_Tubulin-specific_chaperone_C_OS=Bos_taurus_OX=9913_GN=TBCC_PE=2_SV=1
Cluster-3.12267	3247.51	-1.30484	9.28e-09	sp_Q3SZD1_PEX19_BOVIN_Peroxisomal_biogenesis_factor_19_OS=Bos_taurus_OX=9913_GN=PEX19_PE=2_SV=1
Cluster-5007.0	758.805	-2.49866	9.28e-09	sp_P80229_ILEU_PIG_Leukocyte_elastase_inhibitor_OS=Sus_scrofa_OX=9823_GN=SERPINB1_PE=1_SV=1
Cluster-16275.1	391.272	-1.13886	9.31e-09	sp_Q80UG5_SEPT9_MOUSE_Septin-9_OS=Mus_musculus_OX=10090_GN=Sept9_PE=1_SV=1
Cluster-14319.1	4434.85	-1.87041	9.33e-09	sp_P40240_CD9_MOUSE_CD9_antigen_OS=Mus_musculus_OX=10090_GN=Cd9_PE=1_SV=2
Cluster-3.2869	548.812	-1.51591	9.33e-09	sp_P15620_ZN271_MOUSE_Zinc_finger_protein_271_OS=Mus_musculus_OX=10090_GN=Znf271_PE=2_SV=1
Cluster-3.10446	3253.55	-1.13531	9.34e-09	sp_O97817_AGRL2_BOVIN_Adhesion_G_protein-coupled_receptor_L2_OS=Bos_taurus_OX=9913_GN=ADGRL2_PE=2_SV=1
Cluster-3.9918	267.573	-1.3585	9.34e-09
Cluster-5142.0	50.4982	-2.66777	9.4e-09
Cluster-11623.0	357.32	-1.63855	9.4e-09	sp_Q5ZK43_TM38A_CHICK_Trimeric_intracellular_cation_channel_type_A_OS=Gallus_gallus_OX=9031_GN=TMEM38A_PE=2_SV=1
Cluster-15383.3	1533.13	-1.47828	9.42e-09	sp_Q8C3X4_GUF1_MOUSE_Translation_factor_Guf1,_mitochondrial_OS=Mus_musculus_OX=10090_GN=Guf1_PE=1_SV=1
Cluster-6861.0	5753.6	-1.8766	9.42e-09	sp_O75323_NIPS2_HUMAN_Protein_NipSnap_homolog_2_OS=Homo_sapiens_OX=9606_GN=NIPSNAP2_PE=1_SV=1
Cluster-3.7207	1287.4	1.64116	9.47e-09	sp_Q9HC56_PCDH9_HUMAN_Protocadherin-9_OS=Homo_sapiens_OX=9606_GN=PCDH9_PE=1_SV=2
Cluster-3.7260	10966.6	-1.72947	9.49e-09	sp_Q4R8M1_SELK_MACFA_Selenoprotein_K_OS=Macaca_fascicularis_OX=9541_GN=SELENOK_PE=3_SV=3
Cluster-6139.0	579.953	-1.82111	9.5e-09	sp_Q8WN57_TYRP1_BOVIN_5,6-dihydroxyindole-2-carboxylic_acid_oxidase_OS=Bos_taurus_OX=9913_GN=TYRP1_PE=2_SV=2
Cluster-11795.0	3576.07	-1.13317	9.51e-09	sp_Q8CAQ8_MIC60_MOUSE_MICOS_complex_subunit_Mic60_OS=Mus_musculus_OX=10090_GN=Immt_PE=1_SV=1
Cluster-3.12033	53.6506	2.2441	9.54e-09
Cluster-3.11912	3509.81	-2.09516	9.55e-09	sp_P27641_XRCC5_MOUSE_X-ray_repair_cross-complementing_protein_5_OS=Mus_musculus_OX=10090_GN=Xrcc5_PE=1_SV=4
Cluster-3.10554	179.904	2.3033	9.65e-09	sp_Q5ZJV7_SHCAF_CHICK_SIN3-HDAC_complex-associated_factor_OS=Gallus_gallus_OX=9031_GN=SINHCAF_PE=2_SV=1
Cluster-3377.0	105.42	1.358	9.65e-09	sp_O00370_LORF2_HUMAN_LINE-1_retrotransposable_element_ORF2_protein_OS=Homo_sapiens_OX=9606_PE=1_SV=1
Cluster-3.5344	170.348	2.40346	9.76e-09
Cluster-16701.0	6314.91	-2.28008	9.88e-09	sp_P23709_NDUS3_BOVIN_NADH_dehydrogenase_[ubiquinone]_iron-sulfur_protein_3,_mitochondrial_OS=Bos_taurus_OX=9913_GN=NDUFS3_PE=1_SV=1
Cluster-3.8882	126.658	1.54608	9.88e-09
Cluster-3.3212	103.806	1.37272	9.93e-09
Cluster-14125.0	321.64	1.28432	9.95e-09	sp_Q587J6_LITD1_MOUSE_LINE-1_type_transposase_domain-containing_protein_1_OS=Mus_musculus_OX=10090_GN=L1td1_PE=2_SV=1
Cluster-3.11698	227.205	-2.35059	9.98e-09	sp_Q8TBM7_TM254_HUMAN_Transmembrane_protein_254_OS=Homo_sapiens_OX=9606_GN=TMEM254_PE=1_SV=1
Cluster-13252.0	871.554	-1.07184	1.01e-08	sp_Q9W719_HPRT_CHICK_Hypoxanthine-guanine_phosphoribosyltransferase_OS=Gallus_gallus_OX=9031_GN=HPRT1_PE=2_SV=1
Cluster-3.114	675.461	-2.35789	1.02e-08	sp_P52434_RPAB3_HUMAN_DNA-directed_RNA_polymerases_I,_II,_and_III_subunit_RPABC3_OS=Homo_sapiens_OX=9606_GN=POLR2H_PE=1_SV=4
Cluster-4418.0	206.09	-2.34963	1.03e-08	sp_O35215_DOPD_MOUSE_D-dopachrome_decarboxylase_OS=Mus_musculus_OX=10090_GN=Ddt_PE=1_SV=3
Cluster-3.12239	246.832	-2.37247	1.04e-08	sp_Q8WVI0_SMIM4_HUMAN_Small_integral_membrane_protein_4_OS=Homo_sapiens_OX=9606_GN=SMIM4_PE=1_SV=2
Cluster-3.4271	2144.48	-1.7059	1.05e-08	sp_P23434_GCSH_HUMAN_Glycine_cleavage_system_H_protein,_mitochondrial_OS=Homo_sapiens_OX=9606_GN=GCSH_PE=1_SV=2
Cluster-10653.1	1459.83	1.41852	1.05e-08	sp_P49454_CENPF_HUMAN_Centromere_protein_F_OS=Homo_sapiens_OX=9606_GN=CENPF_PE=1_SV=2
Cluster-3.12299	2967.39	-1.91102	1.05e-08	sp_Q71UE8_NEDD8_RAT_NEDD8_OS=Rattus_norvegicus_OX=10116_GN=Nedd8_PE=1_SV=1
Cluster-3.229	3413.81	-1.6437	1.06e-08	sp_Q9NW68_BSDC1_HUMAN_BSD_domain-containing_protein_1_OS=Homo_sapiens_OX=9606_GN=BSDC1_PE=1_SV=1
Cluster-611.0	1160.77	-1.42511	1.06e-08	sp_Q17RM4_CC142_HUMAN_Coiled-coil_domain-containing_protein_142_OS=Homo_sapiens_OX=9606_GN=CCDC142_PE=2_SV=1
Cluster-15580.0	4518.29	-2.25516	1.06e-08	sp_O55057_PDE6D_MOUSE_Retinal_rod_rhodopsin-sensitive_cGMP_3',5'-cyclic_phosphodiesterase_subunit_delta_OS=Mus_musculus_OX=10090_GN=Pde6d_PE=1_SV=1
Cluster-3.9859	2498.02	-1.73541	1.07e-08	sp_P0DJE0_PT100_MOUSE_Protein_PET100_homolog,_mitochondrial_OS=Mus_musculus_OX=10090_GN=Pet100_PE=1_SV=1
Cluster-3.6679	4260.53	-2.07896	1.07e-08	sp_Q9BWD1_THIC_HUMAN_Acetyl-CoA_acetyltransferase,_cytosolic_OS=Homo_sapiens_OX=9606_GN=ACAT2_PE=1_SV=2
Cluster-3.10645	5427.04	-1.05566	1.08e-08
Cluster-3.3022	25150.7	-1.83988	1.08e-08	sp_P82013_VDAC2_MELGA_Voltage-dependent_anion-selective_channel_protein_2_OS=Meleagris_gallopavo_OX=9103_GN=VDAC2_PE=1_SV=1
Cluster-3.8232	2010.16	-1.17548	1.08e-08	sp_Q6IV57_RN141_RAT_RING_finger_protein_141_OS=Rattus_norvegicus_OX=10116_GN=Rnf141_PE=2_SV=1
Cluster-3.8267	1207.1	-1.53735	1.09e-08	sp_Q4VA44_ZN664_MOUSE_Zinc_finger_protein_664_OS=Mus_musculus_OX=10090_GN=Znf664_PE=2_SV=2
Cluster-9774.0	297.981	-2.1096	1.1e-08	sp_P58557_YBEY_HUMAN_Endoribonuclease_YbeY_OS=Homo_sapiens_OX=9606_GN=YBEY_PE=1_SV=2
Cluster-14069.0	91.8341	1.66885	1.14e-08
Cluster-12841.0	278.666	-2.00569	1.14e-08
Cluster-3.13293	337.145	2.78057	1.15e-08	sp_P52293_IMA1_MOUSE_Importin_subunit_alpha-1_OS=Mus_musculus_OX=10090_GN=Kpna2_PE=1_SV=2
Cluster-3.3901	242.958	-1.45982	1.15e-08
Cluster-3.8673	624.442	1.46028	1.15e-08	sp_Q5T7N2_LITD1_HUMAN_LINE-1_type_transposase_domain-containing_protein_1_OS=Homo_sapiens_OX=9606_GN=L1TD1_PE=1_SV=1
Cluster-3.5405	1182.25	-1.99657	1.15e-08	sp_Q5ZJW6_KBRS2_CHICK_NF-kappa-B_inhibitor-interacting_Ras-like_protein_2_OS=Gallus_gallus_OX=9031_GN=NKIRAS2_PE=2_SV=1
Cluster-455.0	4021.66	1.08849	1.16e-08	sp_P34743_BTG1_CHICK_Protein_BTG1_OS=Gallus_gallus_OX=9031_GN=BTG1_PE=2_SV=1
Cluster-8385.0	69.6943	1.90636	1.16e-08	sp_O35317_PBX3_MOUSE_Pre-B-cell_leukemia_transcription_factor_3_OS=Mus_musculus_OX=10090_GN=Pbx3_PE=2_SV=1
Cluster-3.7187	1924.25	-1.44944	1.16e-08	sp_Q8BSL7_ARF2_MOUSE_ADP-ribosylation_factor_2_OS=Mus_musculus_OX=10090_GN=Arf2_PE=1_SV=2
Cluster-10194.0	243.179	-2.3408	1.17e-08	sp_A6NFY7_SDHF1_HUMAN_Succinate_dehydrogenase_assembly_factor_1,_mitochondrial_OS=Homo_sapiens_OX=9606_GN=SDHAF1_PE=1_SV=1
Cluster-13200.0	158.066	-1.85336	1.17e-08	sp_A5PN52_CK088_DANRE_UPF0722_protein_C11orf88_homolog_OS=Danio_rerio_OX=7955_GN=si:dkey-27p23.3_PE=3_SV=1
Cluster-4871.0	239.057	-1.24743	1.17e-08	sp_A2RT67_DEND3_MOUSE_DENN_domain-containing_protein_3_OS=Mus_musculus_OX=10090_GN=Dennd3_PE=1_SV=2
Cluster-7569.0	2561.4	-1.889	1.18e-08	sp_Q6DGW9_TMCO1_DANRE_Calcium_load-activated_calcium_channel_OS=Danio_rerio_OX=7955_GN=tmco1_PE=2_SV=1
Cluster-3.931	2801.4	-1.38808	1.19e-08	sp_Q8BH18_TM117_MOUSE_Transmembrane_protein_117_OS=Mus_musculus_OX=10090_GN=Tmem117_PE=1_SV=1
Cluster-14332.0	1979.13	-2.25167	1.21e-08	sp_Q6AZW1_KISHB_DANRE_Protein_kish-B_OS=Danio_rerio_OX=7955_GN=tmem167b_PE=3_SV=1
Cluster-3.8006	3900.05	-1.48557	1.22e-08	sp_P23711_HMOX2_RAT_Heme_oxygenase_2_OS=Rattus_norvegicus_OX=10116_GN=Hmox2_PE=1_SV=1
Cluster-3877.0	904.686	-1.50193	1.23e-08	sp_Q2KJ84_TMED5_BOVIN_Transmembrane_emp24_domain-containing_protein_5_OS=Bos_taurus_OX=9913_GN=TMED5_PE=2_SV=1
Cluster-10730.2	390.453	-1.89019	1.23e-08	sp_Q8N7A1_KLDC1_HUMAN_Kelch_domain-containing_protein_1_OS=Homo_sapiens_OX=9606_GN=KLHDC1_PE=2_SV=2
Cluster-2978.0	58.7086	1.32088	1.24e-08
Cluster-7953.0	1085.03	-2.1885	1.27e-08	sp_Q96NA8_TSNA1_HUMAN_t-SNARE_domain-containing_protein_1_OS=Homo_sapiens_OX=9606_GN=TSNARE1_PE=1_SV=2
Cluster-10433.0	1736.1	-1.66408	1.27e-08	sp_A5A6L6_SCN1B_PANTR_Sodium_channel_subunit_beta-1_OS=Pan_troglodytes_OX=9598_GN=SCN1B_PE=2_SV=1
Cluster-8248.0	50.7502	-3.06437	1.27e-08
Cluster-15702.2	3837.33	-2.07184	1.28e-08	sp_Q16667_CDKN3_HUMAN_Cyclin-dependent_kinase_inhibitor_3_OS=Homo_sapiens_OX=9606_GN=CDKN3_PE=1_SV=1
Cluster-3.3917	1294.06	-1.65014	1.28e-08	sp_Q6PBU7_UQCC2_DANRE_Ubiquinol-cytochrome-c_reductase_complex_assembly_factor_2_OS=Danio_rerio_OX=7955_GN=uqcc2_PE=2_SV=1
Cluster-3.9340	6829.31	-2.31001	1.28e-08	sp_Q5RC24_QCR7_PONAB_Cytochrome_b-c1_complex_subunit_7_OS=Pongo_abelii_OX=9601_GN=UQCRB_PE=3_SV=3
Cluster-197.0	132.911	-2.50116	1.28e-08	sp_Q28FE4_MORN5_XENTR_MORN_repeat-containing_protein_5_OS=Xenopus_tropicalis_OX=8364_GN=morn5_PE=2_SV=1
Cluster-3.8843	7359.81	-1.69957	1.28e-08	sp_Q9EQX9_UBE2N_RAT_Ubiquitin-conjugating_enzyme_E2_N_OS=Rattus_norvegicus_OX=10116_GN=Ube2n_PE=1_SV=1
Cluster-8246.0	1672.95	-1.63065	1.29e-08	sp_Q1LZH0_U1SBP_BOVIN_U11/U12_small_nuclear_ribonucleoprotein_35_kDa_protein_OS=Bos_taurus_OX=9913_GN=SNRNP35_PE=2_SV=1
Cluster-9957.0	1173.49	-1.65472	1.3e-08	sp_Q6NT89_TRNP1_HUMAN_TMF-regulated_nuclear_protein_1_OS=Homo_sapiens_OX=9606_GN=TRNP1_PE=2_SV=2
Cluster-3.12995	534.437	-1.62148	1.31e-08	sp_P25490_TYY1_HUMAN_Transcriptional_repressor_protein_YY1_OS=Homo_sapiens_OX=9606_GN=YY1_PE=1_SV=2
Cluster-3.6816	95.1968	1.71161	1.31e-08	sp_Q5T0B9_ZN362_HUMAN_Zinc_finger_protein_362_OS=Homo_sapiens_OX=9606_GN=ZNF362_PE=1_SV=1
Cluster-14700.0	132.27	1.45415	1.32e-08
Cluster-3.4390	3696.54	-1.66155	1.34e-08	sp_Q8CB19_PHTF2_MOUSE_Putative_homeodomain_transcription_factor_2_OS=Mus_musculus_OX=10090_GN=Phtf2_PE=1_SV=2
Cluster-9211.1	13697.8	-1.73711	1.34e-08	sp_B2GUZ1_UBP4_RAT_Ubiquitin_carboxyl-terminal_hydrolase_4_OS=Rattus_norvegicus_OX=10116_GN=Usp4_PE=1_SV=1
Cluster-3.1670	276.772	1.13349	1.34e-08	sp_O00370_LORF2_HUMAN_LINE-1_retrotransposable_element_ORF2_protein_OS=Homo_sapiens_OX=9606_PE=1_SV=1
Cluster-3.8763	2480.63	-1.5589	1.34e-08	sp_Q499W2_SLD5_RAT_DNA_replication_complex_GINS_protein_SLD5_OS=Rattus_norvegicus_OX=10116_GN=Gins4_PE=1_SV=1
Cluster-15371.0	3677.65	-1.48106	1.34e-08
Cluster-3.3820	74.9954	1.51361	1.34e-08
Cluster-3.8273	3792.59	-1.73842	1.35e-08	sp_P33176_KINH_HUMAN_Kinesin-1_heavy_chain_OS=Homo_sapiens_OX=9606_GN=KIF5B_PE=1_SV=1
Cluster-15156.0	75.9526	-1.60855	1.35e-08	sp_Q28614_UT2_RABIT_Urea_transporter_2_OS=Oryctolagus_cuniculus_OX=9986_GN=SLC14A2_PE=2_SV=1
Cluster-16083.0	3987.8	-1.42837	1.36e-08	sp_Q93034_CUL5_HUMAN_Cullin-5_OS=Homo_sapiens_OX=9606_GN=CUL5_PE=1_SV=4
Cluster-9170.0	444.498	1.22717	1.36e-08	sp_Q9C0H6_KLHL4_HUMAN_Kelch-like_protein_4_OS=Homo_sapiens_OX=9606_GN=KLHL4_PE=1_SV=2
Cluster-2364.0	173.029	-1.58908	1.36e-08	sp_Q9CR70_LAGE3_MOUSE_EKC/KEOPS_complex_subunit_Lage3_OS=Mus_musculus_OX=10090_GN=Lage3_PE=2_SV=1
Cluster-13096.1	1368.73	-1.26492	1.36e-08	sp_Q08874_MITF_MOUSE_Microphthalmia-associated_transcription_factor_OS=Mus_musculus_OX=10090_GN=Mitf_PE=1_SV=4
Cluster-16205.1	510.275	1.89585	1.36e-08	sp_Q9UKE5_TNIK_HUMAN_TRAF2_and_NCK-interacting_protein_kinase_OS=Homo_sapiens_OX=9606_GN=TNIK_PE=1_SV=1
Cluster-3.10282	141.279	1.13005	1.36e-08
Cluster-3.2091	1803.83	-2.27466	1.36e-08	sp_Q1LUK1_MIC13_DANRE_MICOS_complex_subunit_MIC13_OS=Danio_rerio_OX=7955_GN=mic13_PE=3_SV=1
Cluster-3.2926	4493.21	-1.95136	1.37e-08	sp_O08651_SERA_RAT_D-3-phosphoglycerate_dehydrogenase_OS=Rattus_norvegicus_OX=10116_GN=Phgdh_PE=1_SV=3
Cluster-8132.0	1397.33	-1.97815	1.37e-08	sp_Q5M8Z6_ASSY_XENTR_Argininosuccinate_synthase_OS=Xenopus_tropicalis_OX=8364_GN=ass1_PE=2_SV=1
Cluster-3.3807	438.695	1.26799	1.37e-08
Cluster-8313.0	951.35	-1.88528	1.39e-08
Cluster-3.7165	847.092	-1.72746	1.39e-08	sp_P82911_RT11_BOVIN_28S_ribosomal_protein_S11,_mitochondrial_OS=Bos_taurus_OX=9913_GN=MRPS11_PE=1_SV=2
Cluster-3469.0	551.553	1.77312	1.39e-08	sp_P56699_CAC1E_DIPOM_Probable_voltage-dependent_R-type_calcium_channel_subunit_alpha-1E_OS=Diplobatis_ommata_OX=1870830_PE=2_SV=1
Cluster-3.7929	430.289	-1.876	1.39e-08	sp_Q1LZ78_NTPCR_BOVIN_Cancer-related_nucleoside-triphosphatase_homolog_OS=Bos_taurus_OX=9913_GN=NTPCR_PE=2_SV=1
Cluster-10711.0	115.471	-2.72358	1.39e-08	sp_P16949_STMN1_HUMAN_Stathmin_OS=Homo_sapiens_OX=9606_GN=STMN1_PE=1_SV=3
Cluster-3.169	23994.5	-1.91963	1.4e-08	sp_Q14590_ZN235_HUMAN_Zinc_finger_protein_235_OS=Homo_sapiens_OX=9606_GN=ZNF235_PE=2_SV=3
Cluster-6286.0	424.963	-1.906	1.4e-08	sp_Q62737_CY24A_RAT_Cytochrome_b-245_light_chain_OS=Rattus_norvegicus_OX=10116_GN=Cyba_PE=1_SV=3
Cluster-9658.1	126.915	-2.70931	1.42e-08	sp_Q96LL4_CH048_HUMAN_Uncharacterized_protein_C8orf48_OS=Homo_sapiens_OX=9606_GN=C8orf48_PE=1_SV=2
Cluster-4128.0	517.184	-1.81833	1.43e-08	sp_A5PJF4_TM218_BOVIN_Transmembrane_protein_218_OS=Bos_taurus_OX=9913_GN=TMEM218_PE=3_SV=1
Cluster-3.1646	214.041	1.42109	1.43e-08	sp_P52926_HMGA2_HUMAN_High_mobility_group_protein_HMGI-C_OS=Homo_sapiens_OX=9606_GN=HMGA2_PE=1_SV=1
Cluster-15896.0	6328.27	-1.21762	1.43e-08	sp_Q5R6R3_CCPG1_PONAB_Cell_cycle_progression_protein_1_OS=Pongo_abelii_OX=9601_GN=CCPG1_PE=2_SV=1
Cluster-7125.0	98.7015	1.88908	1.43e-08	sp_Q28GV1_CNDH2_XENTR_Condensin-2_complex_subunit_H2_OS=Xenopus_tropicalis_OX=8364_GN=ncaph2_PE=2_SV=1
Cluster-11662.0	219.649	-2.04491	1.44e-08
Cluster-3.12708	229.294	1.24324	1.44e-08	sp_P11369_LORF2_MOUSE_LINE-1_retrotransposable_element_ORF2_protein_OS=Mus_musculus_OX=10090_GN=Pol_PE=1_SV=2
Cluster-3.7043	197.497	-1.4047	1.44e-08
Cluster-12589.0	1355.9	-2.29169	1.45e-08	sp_Q2YDI5_RM48_BOVIN_39S_ribosomal_protein_L48,_mitochondrial_OS=Bos_taurus_OX=9913_GN=MRPL48_PE=1_SV=1
Cluster-16133.0	4118.08	-2.32815	1.45e-08	sp_Q6GPQ6_EDF1_XENLA_Endothelial_differentiation-related_factor_1_homolog_OS=Xenopus_laevis_OX=8355_GN=edf1_PE=2_SV=1
Cluster-9860.0	2822.43	-2.21161	1.45e-08
Cluster-13926.0	1902.11	-1.98042	1.46e-08
Cluster-7334.0	547.276	-2.12875	1.46e-08	sp_Q28GD1_RM51_XENTR_39S_ribosomal_protein_L51,_mitochondrial_OS=Xenopus_tropicalis_OX=8364_GN=mrpl51_PE=2_SV=1
Cluster-8058.0	199.452	-2.61769	1.46e-08
Cluster-1471.0	157.875	-1.79411	1.46e-08	sp_Q14258_TRI25_HUMAN_E3_ubiquitin/ISG15_ligase_TRIM25_OS=Homo_sapiens_OX=9606_GN=TRIM25_PE=1_SV=2
Cluster-3.4202	4693.19	-2.48957	1.47e-08	sp_Q0MQH4_NDUS5_PANTR_NADH_dehydrogenase_[ubiquinone]_iron-sulfur_protein_5_OS=Pan_troglodytes_OX=9598_GN=NDUFS5_PE=3_SV=3
Cluster-15250.0	2517.23	-1.46259	1.48e-08	sp_B1WAX6_TIGAR_XENTR_Fructose-2,6-bisphosphatase_TIGAR_OS=Xenopus_tropicalis_OX=8364_GN=tigar_PE=2_SV=1
Cluster-3.3818	6695.14	-2.27909	1.48e-08	sp_Q91WE9_F19A5_MOUSE_Protein_FAM19A5_OS=Mus_musculus_OX=10090_GN=Fam19a5_PE=2_SV=2
Cluster-6023.0	1227.77	-2.10633	1.49e-08	sp_Q5BK20_JUPI2_RAT_Jupiter_microtubule_associated_homolog_2_OS=Rattus_norvegicus_OX=10116_GN=Jpt2_PE=2_SV=1
Cluster-9618.0	883.523	-1.20269	1.49e-08	sp_Q90641_IPKA_CHICK_cAMP-dependent_protein_kinase_inhibitor_alpha_OS=Gallus_gallus_OX=9031_GN=PKIA_PE=3_SV=3
Cluster-742.0	4219.25	-1.25876	1.5e-08	sp_Q62420_SH3G2_MOUSE_Endophilin-A1_OS=Mus_musculus_OX=10090_GN=Sh3gl2_PE=1_SV=2
Cluster-9675.0	1971.29	-1.58611	1.5e-08	sp_Q9QYI4_DJB12_MOUSE_DnaJ_homolog_subfamily_B_member_12_OS=Mus_musculus_OX=10090_GN=Dnajb12_PE=1_SV=2
Cluster-3.12600	8475.89	-2.34809	1.51e-08
Cluster-1379.0	2933.06	-2.29418	1.51e-08	sp_Q6DER1_MCTS1_XENTR_Malignant_T-cell-amplified_sequence_1_OS=Xenopus_tropicalis_OX=8364_GN=mcts1_PE=2_SV=1
Cluster-9906.0	291.139	-2.60294	1.51e-08	sp_Q8BHA0_IN80C_MOUSE_INO80_complex_subunit_C_OS=Mus_musculus_OX=10090_GN=Ino80c_PE=1_SV=1
Cluster-7783.0	5539.67	-1.97418	1.51e-08	sp_Q9D1C8_VPS28_MOUSE_Vacuolar_protein_sorting-associated_protein_28_homolog_OS=Mus_musculus_OX=10090_GN=Vps28_PE=1_SV=1
Cluster-3.10757	7247.97	-1.78298	1.52e-08	sp_Q8N4N3_KLH36_HUMAN_Kelch-like_protein_36_OS=Homo_sapiens_OX=9606_GN=KLHL36_PE=1_SV=1
Cluster-7978.1	2381.23	-1.04072	1.52e-08	sp_Q07984_SSRD_RAT_Translocon-associated_protein_subunit_delta_OS=Rattus_norvegicus_OX=10116_GN=Ssr4_PE=2_SV=1
Cluster-3.7736	2138.6	-2.08789	1.57e-08	sp_Q9BQ49_SMIM7_HUMAN_Small_integral_membrane_protein_7_OS=Homo_sapiens_OX=9606_GN=SMIM7_PE=1_SV=2
Cluster-11593.0	731.104	-1.52526	1.57e-08	sp_Q8JGM8_BID_CHICK_BH3-interacting_domain_death_agonist_OS=Gallus_gallus_OX=9031_GN=BID_PE=2_SV=2
Cluster-12318.0	7345.83	-1.7552	1.57e-08	sp_Q5ZI57_TPPC3_CHICK_Trafficking_protein_particle_complex_subunit_3_OS=Gallus_gallus_OX=9031_GN=TRAPPC3_PE=2_SV=1
Cluster-13028.1	112.278	-1.68772	1.58e-08
Cluster-11758.0	51.7197	2.14989	1.59e-08	sp_F1QZ88_E2F8_DANRE_Transcription_factor_E2F8_OS=Danio_rerio_OX=7955_GN=e2f8_PE=3_SV=1
Cluster-3.11378	4286.34	-2.21938	1.59e-08	sp_P25054_APC_HUMAN_Adenomatous_polyposis_coli_protein_OS=Homo_sapiens_OX=9606_GN=APC_PE=1_SV=2
Cluster-9879.0	19301	-1.86618	1.59e-08	sp_Q64620_PPP6_RAT_Serine/threonine-protein_phosphatase_6_catalytic_subunit_OS=Rattus_norvegicus_OX=10116_GN=Ppp6c_PE=2_SV=2
Cluster-3.6389	158.222	-2.83555	1.62e-08
Cluster-6173.0	5559.37	1.21454	1.64e-08
Cluster-3.11357	180.182	1.16231	1.64e-08
Cluster-3.6675	348.954	-1.36505	1.65e-08	sp_Q9BTE0_NAT9_HUMAN_N-acetyltransferase_9_OS=Homo_sapiens_OX=9606_GN=NAT9_PE=1_SV=1
Cluster-3.839	52.4387	1.62287	1.65e-08
Cluster-15755.1	2370.81	-1.29401	1.65e-08	sp_Q9NRL2_BAZ1A_HUMAN_Bromodomain_adjacent_to_zinc_finger_domain_protein_1A_OS=Homo_sapiens_OX=9606_GN=BAZ1A_PE=1_SV=2
Cluster-6112.0	849.097	-1.45672	1.66e-08	sp_Q3U481_MFS12_MOUSE_Major_facilitator_superfamily_domain-containing_protein_12_OS=Mus_musculus_OX=10090_GN=Mfsd12_PE=1_SV=1
Cluster-12755.0	3039.06	-1.03583	1.68e-08	sp_Q9ULR3_PPM1H_HUMAN_Protein_phosphatase_1H_OS=Homo_sapiens_OX=9606_GN=PPM1H_PE=1_SV=2
Cluster-15338.0	1751.2	-1.04317	1.69e-08
Cluster-3.4459	3547.84	-1.05356	1.71e-08	sp_Q9BQS8_FYCO1_HUMAN_FYVE_and_coiled-coil_domain-containing_protein_1_OS=Homo_sapiens_OX=9606_GN=FYCO1_PE=1_SV=3
Cluster-3.2344	814.237	1.11742	1.73e-08	sp_Q9Y4A0_JERKL_HUMAN_Jerky_protein_homolog-like_OS=Homo_sapiens_OX=9606_GN=JRKL_PE=2_SV=2
Cluster-9118.1	436.043	-1.94265	1.73e-08	sp_Q9HD15_SRA1_HUMAN_Steroid_receptor_RNA_activator_1_OS=Homo_sapiens_OX=9606_GN=SRA1_PE=1_SV=1
Cluster-7545.0	160.166	1.51678	1.73e-08
Cluster-424.0	1126.93	-1.41237	1.73e-08	sp_Q5M956_KCTD1_MOUSE_BTB/POZ_domain-containing_protein_KCTD1_OS=Mus_musculus_OX=10090_GN=Kctd1_PE=1_SV=1
Cluster-7149.0	195.532	-1.61141	1.74e-08	sp_Q9CYS6_CB072_MOUSE_Uncharacterized_protein_C2orf72_homolog_OS=Mus_musculus_OX=10090_PE=1_SV=2
Cluster-3.7812	112.222	2.18233	1.75e-08
Cluster-16613.1	724.714	-1.56875	1.75e-08	sp_Q9C0D5_TANC1_HUMAN_Protein_TANC1_OS=Homo_sapiens_OX=9606_GN=TANC1_PE=1_SV=3
Cluster-7348.1	534.086	-2.16915	1.75e-08	sp_Q32NG4_GALD1_XENLA_Glutamine_amidotransferase-like_class_1_domain-containing_protein_1_OS=Xenopus_laevis_OX=8355_GN=gatd1_PE=2_SV=1
Cluster-12808.0	59.0723	1.53048	1.76e-08	sp_Q8BR93_HARB1_MOUSE_Putative_nuclease_HARBI1_OS=Mus_musculus_OX=10090_GN=Harbi1_PE=2_SV=1
Cluster-13831.0	318.494	-1.85537	1.76e-08
Cluster-3.11448	718.878	-2.19419	1.76e-08	sp_A8WH72_CD302_TRIVU_CD302_antigen_OS=Trichosurus_vulpecula_OX=9337_GN=CD302_PE=2_SV=1
Cluster-6772.0	926.472	-2.08134	1.76e-08
Cluster-16214.0	3135.77	-1.33081	1.79e-08	sp_O94810_RGS11_HUMAN_Regulator_of_G-protein_signaling_11_OS=Homo_sapiens_OX=9606_GN=RGS11_PE=1_SV=2
Cluster-12969.0	2140.63	-2.15536	1.79e-08	sp_Q9Y2Y1_RPC10_HUMAN_DNA-directed_RNA_polymerase_III_subunit_RPC10_OS=Homo_sapiens_OX=9606_GN=POLR3K_PE=1_SV=2
Cluster-3.6133	677.056	1.78823	1.8e-08
Cluster-13472.1	1821.72	-1.19563	1.81e-08	sp_Q6R0H7_GNAS1_MOUSE_Guanine_nucleotide-binding_protein_G(s)_subunit_alpha_isoforms_XLas_OS=Mus_musculus_OX=10090_GN=Gnas_PE=1_SV=1
Cluster-10347.0	142.593	-1.20761	1.81e-08	sp_Q5KR49_TPM1_BOVIN_Tropomyosin_alpha-1_chain_OS=Bos_taurus_OX=9913_GN=TPM1_PE=2_SV=1
Cluster-3998.0	384.263	1.31407	1.81e-08
Cluster-3.10606	1274.21	-1.93123	1.82e-08	sp_Q6UX41_BTNL8_HUMAN_Butyrophilin-like_protein_8_OS=Homo_sapiens_OX=9606_GN=BTNL8_PE=1_SV=1
Cluster-9945.0	66.8929	1.57153	1.82e-08
Cluster-15215.0	146.358	-1.21321	1.84e-08	sp_Q4R6I5_CLHC1_MACFA_Clathrin_heavy_chain_linker_domain-containing_protein_1_OS=Macaca_fascicularis_OX=9541_GN=CLHC1_PE=2_SV=1
Cluster-3118.0	1718.93	-1.61273	1.84e-08	sp_Q9ULX6_AKP8L_HUMAN_A-kinase_anchor_protein_8-like_OS=Homo_sapiens_OX=9606_GN=AKAP8L_PE=1_SV=3
Cluster-6063.0	302.823	-1.83038	1.84e-08	sp_Q99442_SEC62_HUMAN_Translocation_protein_SEC62_OS=Homo_sapiens_OX=9606_GN=SEC62_PE=1_SV=1
Cluster-3.1976	944.732	-1.91052	1.85e-08
Cluster-12699.1	897.158	-1.27894	1.85e-08	sp_Q8C4B4_U119B_MOUSE_Protein_unc-119_homolog_B_OS=Mus_musculus_OX=10090_GN=Unc119b_PE=1_SV=1
Cluster-5099.0	131.545	-2.09952	1.87e-08	sp_Q9UBB5_MBD2_HUMAN_Methyl-CpG-binding_domain_protein_2_OS=Homo_sapiens_OX=9606_GN=MBD2_PE=1_SV=1
Cluster-3.9213	1735.01	-1.87793	1.88e-08	sp_Q5HZZ6_MED8A_XENLA_Mediator_of_RNA_polymerase_II_transcription_subunit_8-A_OS=Xenopus_laevis_OX=8355_GN=med8-a_PE=2_SV=1
Cluster-3189.0	218.734	1.73984	1.88e-08	sp_P08289_PPBT_RAT_Alkaline_phosphatase,_tissue-nonspecific_isozyme_OS=Rattus_norvegicus_OX=10116_GN=Alpl_PE=1_SV=2
Cluster-3.2746	320.269	1.69784	1.89e-08
Cluster-3.10089	479.224	-1.31191	1.89e-08
Cluster-3.172	73.4531	1.12495	1.89e-08
Cluster-7916.0	3686.57	-1.7428	1.89e-08	sp_Q865B7_PRGC1_BOVIN_Peroxisome_proliferator-activated_receptor_gamma_coactivator_1-alpha_OS=Bos_taurus_OX=9913_GN=PPARGC1A_PE=2_SV=1
Cluster-7233.0	773.721	-2.38703	1.92e-08	sp_Q5T6J7_GNTK_HUMAN_Probable_gluconokinase_OS=Homo_sapiens_OX=9606_GN=IDNK_PE=1_SV=1
Cluster-14508.0	223.845	-2.54895	1.93e-08	sp_Q5E9T4_TPK1_BOVIN_Thiamin_pyrophosphokinase_1_OS=Bos_taurus_OX=9913_GN=TPK1_PE=2_SV=1
Cluster-13125.0	286.278	-1.17094	1.94e-08	sp_Q69ZN7_MYOF_MOUSE_Myoferlin_OS=Mus_musculus_OX=10090_GN=Myof_PE=1_SV=2
Cluster-5412.1	50.9465	1.66204	1.96e-08	sp_O60662_KLH41_HUMAN_Kelch-like_protein_41_OS=Homo_sapiens_OX=9606_GN=KLHL41_PE=1_SV=2
Cluster-3.8402	126.117	-1.05413	1.97e-08	sp_A0PJZ3_GXLT2_HUMAN_Glucoside_xylosyltransferase_2_OS=Homo_sapiens_OX=9606_GN=GXYLT2_PE=2_SV=2
Cluster-3.2438	3090.88	-1.7015	1.98e-08	sp_P55745_RAB21_CANLF_Ras-related_protein_Rab-21_OS=Canis_lupus_familiaris_OX=9615_GN=RAB21_PE=3_SV=3
Cluster-2110.0	921.109	-1.24882	1.98e-08	sp_P51957_NEK4_HUMAN_Serine/threonine-protein_kinase_Nek4_OS=Homo_sapiens_OX=9606_GN=NEK4_PE=1_SV=2
Cluster-3.4724	14132.2	-1.89042	1.99e-08	sp_Q5ZJ54_TCPZ_CHICK_T-complex_protein_1_subunit_zeta_OS=Gallus_gallus_OX=9031_GN=CCT6_PE=1_SV=3
Cluster-13924.1	3901.38	-1.14477	1.99e-08	sp_Q58DU7_SH3L1_BOVIN_SH3_domain-binding_glutamic_acid-rich-like_protein_OS=Bos_taurus_OX=9913_GN=SH3BGRL_PE=3_SV=1
Cluster-8858.2	1396.23	-1.74801	1.99e-08	sp_P53565_CUX1_RAT_Homeobox_protein_cut-like_1_OS=Rattus_norvegicus_OX=10116_GN=Cux1_PE=1_SV=2
Cluster-13181.0	2171.46	1.0766	1.99e-08	sp_P23468_PTPRD_HUMAN_Receptor-type_tyrosine-protein_phosphatase_delta_OS=Homo_sapiens_OX=9606_GN=PTPRD_PE=1_SV=2
Cluster-355.0	6773.53	-1.14109	2.03e-08	sp_Q8AWF2_NACA_ORENI_Nascent_polypeptide-associated_complex_subunit_alpha_OS=Oreochromis_niloticus_OX=8128_GN=naca_PE=2_SV=1
Cluster-2176.0	818.365	-1.85756	2.03e-08	sp_Q5RD58_CL004_PONAB_Protein_C12orf4_homolog_OS=Pongo_abelii_OX=9601_PE=2_SV=1
Cluster-16664.0	1475.3	-1.48969	2.06e-08	sp_O95299_NDUAA_HUMAN_NADH_dehydrogenase_[ubiquinone]_1_alpha_subcomplex_subunit_10,_mitochondrial_OS=Homo_sapiens_OX=9606_GN=NDUFA10_PE=1_SV=1
Cluster-5912.0	1999.59	-1.55325	2.07e-08	sp_Q28DB1_MZT2B_XENTR_Mitotic-spindle_organizing_protein_2B_OS=Xenopus_tropicalis_OX=8364_GN=mzt2b_PE=2_SV=1
Cluster-14067.0	60.9934	-3.64127	2.1e-08	sp_Q95LF0_I13R2_CANLF_Interleukin-13_receptor_subunit_alpha-2_OS=Canis_lupus_familiaris_OX=9615_GN=IL13RA2_PE=2_SV=1
Cluster-6438.0	558.212	-1.91282	2.1e-08	sp_Q8BTC1_CL073_MOUSE_Uncharacterized_protein_C12orf73_homolog_OS=Mus_musculus_OX=10090_PE=3_SV=1
Cluster-4435.0	244.19	-1.79556	2.11e-08	sp_Q09666_AHNK_HUMAN_Neuroblast_differentiation-associated_protein_AHNAK_OS=Homo_sapiens_OX=9606_GN=AHNAK_PE=1_SV=2
Cluster-8893.0	196.283	-1.19684	2.12e-08	sp_Q8TCE6_FA45A_HUMAN_Protein_FAM45A_OS=Homo_sapiens_OX=9606_GN=FAM45A_PE=2_SV=1
Cluster-8580.0	1245.4	-1.24868	2.14e-08	sp_O19069_SUCA_PIG_Succinate--CoA_ligase_[ADP/GDP-forming]_subunit_alpha,_mitochondrial_OS=Sus_scrofa_OX=9823_GN=SUCLG1_PE=1_SV=2
Cluster-15391.0	88.0866	-2.42261	2.15e-08	sp_Q04913_NR4A1_XENLA_Nuclear_receptor_subfamily_4_group_A_member_1_OS=Xenopus_laevis_OX=8355_GN=nr4a1_PE=2_SV=1
Cluster-3.7563	3206.99	-1.20175	2.16e-08	sp_Q7ZXY0_INO1A_XENLA_Inositol-3-phosphate_synthase_1-A_OS=Xenopus_laevis_OX=8355_GN=isyna1-a_PE=2_SV=1
Cluster-3.8644	228.891	1.97517	2.16e-08
Cluster-13336.0	3384.72	-1.94841	2.17e-08	sp_Q9NZZ3_CHMP5_HUMAN_Charged_multivesicular_body_protein_5_OS=Homo_sapiens_OX=9606_GN=CHMP5_PE=1_SV=1
Cluster-76.0	2343.31	-2.01955	2.18e-08	sp_Q5XH57_ORML1_XENLA_ORM1-like_protein_1_OS=Xenopus_laevis_OX=8355_GN=ormdl1_PE=2_SV=1
Cluster-4507.0	1852.49	1.24654	2.18e-08	sp_Q6ZQ58_LARP1_MOUSE_La-related_protein_1_OS=Mus_musculus_OX=10090_GN=Larp1_PE=1_SV=3
Cluster-3.8117	144.233	1.38193	2.19e-08	sp_Q53HC0_CCD92_HUMAN_Coiled-coil_domain-containing_protein_92_OS=Homo_sapiens_OX=9606_GN=CCDC92_PE=1_SV=2
Cluster-4364.0	229.525	-2.17745	2.19e-08	sp_Q8VCE1_DJC28_MOUSE_DnaJ_homolog_subfamily_C_member_28_OS=Mus_musculus_OX=10090_GN=Dnajc28_PE=1_SV=2
Cluster-3.7613	985.624	-1.24086	2.22e-08	sp_Q8N3E9_PLCD3_HUMAN_1-phosphatidylinositol_4,5-bisphosphate_phosphodiesterase_delta-3_OS=Homo_sapiens_OX=9606_GN=PLCD3_PE=1_SV=3
Cluster-4197.0	105.131	-1.97831	2.23e-08	sp_A1L162_ERIC2_HUMAN_Glutamate-rich_protein_2_OS=Homo_sapiens_OX=9606_GN=ERICH2_PE=1_SV=1
Cluster-3.7996	686.751	-1.82301	2.24e-08	sp_Q8N128_F177A_HUMAN_Protein_FAM177A1_OS=Homo_sapiens_OX=9606_GN=FAM177A1_PE=1_SV=1
Cluster-10167.1	16790.8	-1.87757	2.25e-08	sp_Q58EE9_GFAP_DANRE_Glial_fibrillary_acidic_protein_OS=Danio_rerio_OX=7955_GN=gfap_PE=1_SV=2
Cluster-3.5041	177.218	1.06044	2.27e-08	sp_Q5TYW1_ZN658_HUMAN_Zinc_finger_protein_658_OS=Homo_sapiens_OX=9606_GN=ZNF658_PE=1_SV=2
Cluster-6833.0	159.343	2.27301	2.27e-08	sp_Q8WWK9_CKAP2_HUMAN_Cytoskeleton-associated_protein_2_OS=Homo_sapiens_OX=9606_GN=CKAP2_PE=1_SV=1
Cluster-4309.0	238.409	-1.6165	2.28e-08	sp_Q9Y2P4_S27A6_HUMAN_Long-chain_fatty_acid_transport_protein_6_OS=Homo_sapiens_OX=9606_GN=SLC27A6_PE=2_SV=1
Cluster-3.2729	782.965	-1.4072	2.29e-08	sp_Q6NWF4_VPS25_DANRE_Vacuolar_protein-sorting-associated_protein_25_OS=Danio_rerio_OX=7955_GN=vps25_PE=2_SV=2
Cluster-3.1143	499.886	-1.42896	2.29e-08	sp_O70348_DXO_MOUSE_Decapping_and_exoribonuclease_protein_OS=Mus_musculus_OX=10090_GN=Dxo_PE=1_SV=2
Cluster-15602.0	5683.09	-1.42567	2.3e-08	sp_Q4R8S6_CP51A_MACFA_Lanosterol_14-alpha_demethylase_OS=Macaca_fascicularis_OX=9541_GN=CYP51A1_PE=2_SV=2
Cluster-12413.0	104.888	-1.96974	2.31e-08
Cluster-3.285	166.155	1.51204	2.31e-08
Cluster-3.4175	5277.59	-2.27037	2.32e-08	sp_Q9D819_IPYR_MOUSE_Inorganic_pyrophosphatase_OS=Mus_musculus_OX=10090_GN=Ppa1_PE=1_SV=1
Cluster-3.4976	7229.69	-2.33214	2.32e-08
Cluster-15579.1	1259.68	-2.09565	2.33e-08	sp_Q5F3N1_PIMT_CHICK_Protein-L-isoaspartate(D-aspartate)_O-methyltransferase_OS=Gallus_gallus_OX=9031_GN=PCMT1_PE=2_SV=3
Cluster-4107.0	718.723	-2.01186	2.34e-08	sp_Q13145_BAMBI_HUMAN_BMP_and_activin_membrane-bound_inhibitor_homolog_OS=Homo_sapiens_OX=9606_GN=BAMBI_PE=1_SV=1
Cluster-12107.0	803.93	-1.83756	2.34e-08	sp_Q8N5N7_RM50_HUMAN_39S_ribosomal_protein_L50,_mitochondrial_OS=Homo_sapiens_OX=9606_GN=MRPL50_PE=1_SV=2
Cluster-3269.0	681.937	-3.09128	2.36e-08	sp_Q9D939_ST1C2_MOUSE_Sulfotransferase_1C2_OS=Mus_musculus_OX=10090_GN=Sult1c2_PE=1_SV=1
Cluster-3.1419	279.804	-1.51892	2.38e-08	sp_Q9DAK3_RHBT1_MOUSE_Rho-related_BTB_domain-containing_protein_1_OS=Mus_musculus_OX=10090_GN=Rhobtb1_PE=1_SV=2
Cluster-3.2268	212.429	1.40255	2.39e-08
Cluster-3.9931	3793.13	-1.67491	2.39e-08	sp_Q9GLW9_PRDX5_PAPHA_Peroxiredoxin-5,_mitochondrial_OS=Papio_hamadryas_OX=9557_GN=PRDX5_PE=2_SV=1
Cluster-15631.0	816.526	1.54094	2.42e-08	sp_O95477_ABCA1_HUMAN_ATP-binding_cassette_sub-family_A_member_1_OS=Homo_sapiens_OX=9606_GN=ABCA1_PE=1_SV=3
Cluster-3656.0	255.885	-1.38052	2.42e-08	sp_Q90XB6_SULF1_COTCO_Extracellular_sulfatase_Sulf-1_OS=Coturnix_coturnix_OX=9091_GN=SULF1_PE=1_SV=1
Cluster-14045.0	2157.65	-2.01034	2.43e-08	sp_P62875_RPAB5_HUMAN_DNA-directed_RNA_polymerases_I,_II,_and_III_subunit_RPABC5_OS=Homo_sapiens_OX=9606_GN=POLR2L_PE=1_SV=1
Cluster-15222.0	404.511	-2.09914	2.43e-08	sp_Q6PE15_ABHDA_MOUSE_Mycophenolic_acid_acyl-glucuronide_esterase,_mitochondrial_OS=Mus_musculus_OX=10090_GN=Abhd10_PE=1_SV=1
Cluster-3.6628	274.956	-1.20143	2.43e-08
Cluster-3.10504	1344.69	-1.37563	2.44e-08	sp_Q6NWF4_VPS25_DANRE_Vacuolar_protein-sorting-associated_protein_25_OS=Danio_rerio_OX=7955_GN=vps25_PE=2_SV=2
Cluster-3.13234	146.817	1.86284	2.44e-08	sp_O43663_PRC1_HUMAN_Protein_regulator_of_cytokinesis_1_OS=Homo_sapiens_OX=9606_GN=PRC1_PE=1_SV=2
Cluster-10766.0	1744.56	-2.12655	2.45e-08
Cluster-8500.0	693.017	-2.41577	2.46e-08	sp_Q5NVE2_SRFB1_PONAB_Serum_response_factor-binding_protein_1_OS=Pongo_abelii_OX=9601_GN=SRFBP1_PE=2_SV=1
Cluster-3.6884	923.31	-1.23003	2.49e-08
Cluster-3.8057	167.407	-1.84156	2.5e-08	sp_Q5RD09_HMR1_PONAB_Major_histocompatibility_complex_class_I-related_gene_protein_OS=Pongo_abelii_OX=9601_GN=MR1_PE=2_SV=1
Cluster-3.2912	4013.87	-1.80353	2.5e-08	sp_P47756_CAPZB_HUMAN_F-actin-capping_protein_subunit_beta_OS=Homo_sapiens_OX=9606_GN=CAPZB_PE=1_SV=4
Cluster-7770.0	823.636	-1.13476	2.5e-08	sp_O15090_ZN536_HUMAN_Zinc_finger_protein_536_OS=Homo_sapiens_OX=9606_GN=ZNF536_PE=1_SV=3
Cluster-15071.1	242.863	1.29827	2.51e-08
Cluster-13027.0	1044.06	-1.91496	2.51e-08	sp_Q5F457_WBP4_CHICK_WW_domain-binding_protein_4_OS=Gallus_gallus_OX=9031_GN=WBP4_PE=2_SV=1
Cluster-3.6964	255.575	1.00559	2.52e-08
Cluster-10840.0	257.589	-1.44755	2.52e-08	sp_Q9UJX0_OSGI1_HUMAN_Oxidative_stress-induced_growth_inhibitor_1_OS=Homo_sapiens_OX=9606_GN=OSGIN1_PE=1_SV=3
Cluster-1981.0	6405.85	-1.2417	2.52e-08	sp_Q9QYL8_LYPA2_RAT_Acyl-protein_thioesterase_2_OS=Rattus_norvegicus_OX=10116_GN=Lypla2_PE=1_SV=1
Cluster-3.12242	4392.82	-1.29689	2.52e-08	sp_Q6PBU7_UQCC2_DANRE_Ubiquinol-cytochrome-c_reductase_complex_assembly_factor_2_OS=Danio_rerio_OX=7955_GN=uqcc2_PE=2_SV=1
Cluster-16631.0	65.631	-3.3222	2.53e-08	sp_Q5D1D6_GBP1_CHLAE_Guanylate-binding_protein_1_OS=Chlorocebus_aethiops_OX=9534_GN=GBP1_PE=2_SV=1
Cluster-3.7296	1096.24	-2.07584	2.53e-08	sp_Q0VBY7_DJC24_BOVIN_DnaJ_homolog_subfamily_C_member_24_OS=Bos_taurus_OX=9913_GN=DNAJC24_PE=2_SV=2
Cluster-12252.2	10934.8	-1.75712	2.56e-08	sp_Q93045_STMN2_HUMAN_Stathmin-2_OS=Homo_sapiens_OX=9606_GN=STMN2_PE=1_SV=3
Cluster-3.9291	3056.13	-1.63824	2.57e-08	sp_Q0IHI1_TXD15_XENLA_Thioredoxin_domain-containing_protein_15_OS=Xenopus_laevis_OX=8355_GN=txndc15_PE=2_SV=1
Cluster-10836.0	1259.4	-1.41874	2.58e-08	sp_Q5RID7_SNX17_DANRE_Sorting_nexin-17_OS=Danio_rerio_OX=7955_GN=snx17_PE=2_SV=1
Cluster-3.10069	154.366	1.65193	2.58e-08
Cluster-14880.0	561.535	-2.1614	2.58e-08	sp_Q1JP75_DCXR_BOVIN_L-xylulose_reductase_OS=Bos_taurus_OX=9913_GN=DCXR_PE=2_SV=1
Cluster-3.8437	2386.9	-1.00571	2.58e-08	sp_Q9D4V0_EKI1_MOUSE_Ethanolamine_kinase_1_OS=Mus_musculus_OX=10090_GN=Etnk1_PE=1_SV=2
Cluster-7018.0	586.692	-2.23035	2.59e-08	sp_Q3T126_CNIH4_BOVIN_Protein_cornichon_homolog_4_OS=Bos_taurus_OX=9913_GN=CNIH4_PE=2_SV=1
Cluster-3.12750	3014.59	-2.1874	2.59e-08	sp_P04233_HG2A_HUMAN_HLA_class_II_histocompatibility_antigen_gamma_chain_OS=Homo_sapiens_OX=9606_GN=CD74_PE=1_SV=3
Cluster-12462.0	1128.54	-2.42433	2.6e-08	sp_D4ACN8_PLRKT_RAT_Plasminogen_receptor_(KT)_OS=Rattus_norvegicus_OX=10116_GN=Plgrkt_PE=1_SV=1
Cluster-1080.0	678.537	-1.86398	2.67e-08	sp_Q9HBK9_AS3MT_HUMAN_Arsenite_methyltransferase_OS=Homo_sapiens_OX=9606_GN=AS3MT_PE=1_SV=3
Cluster-3.8312	56955.3	-1.84999	2.67e-08	sp_P63017_HSP7C_MOUSE_Heat_shock_cognate_71_kDa_protein_OS=Mus_musculus_OX=10090_GN=Hspa8_PE=1_SV=1
Cluster-3178.0	92.2699	1.75457	2.67e-08
Cluster-10984.0	1825.36	-1.04886	2.68e-08	sp_Q9QWW1_HOME2_MOUSE_Homer_protein_homolog_2_OS=Mus_musculus_OX=10090_GN=Homer2_PE=1_SV=1
Cluster-7686.0	665.315	-1.94694	2.68e-08	sp_Q9H336_CRLD1_HUMAN_Cysteine-rich_secretory_protein_LCCL_domain-containing_1_OS=Homo_sapiens_OX=9606_GN=CRISPLD1_PE=2_SV=1
Cluster-2680.0	148.53	2.32595	2.68e-08
Cluster-3.11306	55.426	1.66448	2.7e-08
Cluster-9220.1	621.166	-1.68774	2.71e-08	sp_Q8VI63_MOB2_MOUSE_MOB_kinase_activator_2_OS=Mus_musculus_OX=10090_GN=Mob2_PE=1_SV=1
Cluster-1042.0	420.278	-1.19386	2.72e-08	sp_Q5VZY2_PLPP4_HUMAN_Phospholipid_phosphatase_4_OS=Homo_sapiens_OX=9606_GN=PLPP4_PE=1_SV=2
Cluster-3.11371	51.3042	-2.47467	2.72e-08	sp_A6NFI3_ZN316_HUMAN_Zinc_finger_protein_316_OS=Homo_sapiens_OX=9606_GN=ZNF316_PE=1_SV=1
Cluster-3442.0	1281.13	-1.39819	2.72e-08	sp_O00308_WWP2_HUMAN_NEDD4-like_E3_ubiquitin-protein_ligase_WWP2_OS=Homo_sapiens_OX=9606_GN=WWP2_PE=1_SV=2
Cluster-5957.0	147.453	1.55919	2.73e-08	sp_Q8NI77_KI18A_HUMAN_Kinesin-like_protein_KIF18A_OS=Homo_sapiens_OX=9606_GN=KIF18A_PE=1_SV=2
Cluster-5442.1	2738.71	1.89148	2.73e-08	sp_Q8WXH0_SYNE2_HUMAN_Nesprin-2_OS=Homo_sapiens_OX=9606_GN=SYNE2_PE=1_SV=3
Cluster-3.12952	3942.88	-1.61866	2.76e-08	sp_B2RXA1_PLCX2_MOUSE_PI-PLC_X_domain-containing_protein_2_OS=Mus_musculus_OX=10090_GN=Plcxd2_PE=2_SV=1
Cluster-11467.0	4454.28	-2.12017	2.77e-08
Cluster-10005.0	276.835	-1.41914	2.77e-08	sp_Q8BZB2_COAC_MOUSE_Phosphopantothenoylcysteine_decarboxylase_OS=Mus_musculus_OX=10090_GN=Ppcdc_PE=1_SV=1
Cluster-3.2107	8157.1	-1.02621	2.77e-08	sp_Q70EL1_UBP54_HUMAN_Inactive_ubiquitin_carboxyl-terminal_hydrolase_54_OS=Homo_sapiens_OX=9606_GN=USP54_PE=1_SV=4
Cluster-14457.0	1816.49	-1.82132	2.79e-08	sp_Q5XI79_NDUF7_RAT_Protein_arginine_methyltransferase_NDUFAF7,_mitochondrial_OS=Rattus_norvegicus_OX=10116_GN=Ndufaf7_PE=2_SV=1
Cluster-2750.0	602.773	-1.55918	2.79e-08	sp_B2RXS4_PLXB2_MOUSE_Plexin-B2_OS=Mus_musculus_OX=10090_GN=Plxnb2_PE=1_SV=1
Cluster-11886.0	535.688	-2.12814	2.81e-08	sp_Q5ZJU4_URM1_CHICK_Ubiquitin-related_modifier_1_OS=Gallus_gallus_OX=9031_GN=URM1_PE=3_SV=1
Cluster-3.7959	454.062	1.37577	2.85e-08
Cluster-7162.0	4036.69	-2.22679	2.86e-08	sp_Q8HXG6_NDUAB_BOVIN_NADH_dehydrogenase_[ubiquinone]_1_alpha_subcomplex_subunit_11_OS=Bos_taurus_OX=9913_GN=NDUFA11_PE=1_SV=3
Cluster-726.0	259.518	1.3152	2.86e-08
Cluster-4542.0	822.441	-1.95456	2.87e-08	sp_Q8TDP1_RNH2C_HUMAN_Ribonuclease_H2_subunit_C_OS=Homo_sapiens_OX=9606_GN=RNASEH2C_PE=1_SV=1
Cluster-3.7743	2918.75	-1.63362	2.88e-08	sp_Q6IC98_GRAM4_HUMAN_GRAM_domain-containing_protein_4_OS=Homo_sapiens_OX=9606_GN=GRAMD4_PE=1_SV=1
Cluster-3.9480	9895.42	1.52542	2.88e-08	sp_Q5RDA9_FBX42_PONAB_F-box_only_protein_42_OS=Pongo_abelii_OX=9601_GN=FBXO42_PE=2_SV=1
Cluster-3.7584	1104.67	-1.05225	2.89e-08
Cluster-10632.1	134.637	-1.81743	2.9e-08	sp_Q8BG73_SH3L2_MOUSE_SH3_domain-binding_glutamic_acid-rich-like_protein_2_OS=Mus_musculus_OX=10090_GN=Sh3bgrl2_PE=1_SV=1
Cluster-3.228	8018.5	-2.38975	2.9e-08
Cluster-3.9320	165.411	1.23439	2.91e-08
Cluster-12352.0	296.098	-1.13867	2.92e-08	sp_Q8BWT1_THIM_MOUSE_3-ketoacyl-CoA_thiolase,_mitochondrial_OS=Mus_musculus_OX=10090_GN=Acaa2_PE=1_SV=3
Cluster-14247.0	725.504	-1.635	2.93e-08	sp_P0C7N9_PSMG4_MOUSE_Proteasome_assembly_chaperone_4_OS=Mus_musculus_OX=10090_GN=Psmg4_PE=1_SV=1
Cluster-16684.0	209.438	1.44327	2.93e-08	sp_Q9Y3R0_GRIP1_HUMAN_Glutamate_receptor-interacting_protein_1_OS=Homo_sapiens_OX=9606_GN=GRIP1_PE=1_SV=3
Cluster-3.5727	112.837	1.02853	2.93e-08	sp_P83006_PAFA2_RAT_Platelet-activating_factor_acetylhydrolase_2,_cytoplasmic_OS=Rattus_norvegicus_OX=10116_GN=Pafah2_PE=1_SV=2
Cluster-3.3970	3060.14	-1.69255	2.94e-08	sp_Q9H5V7_IKZF5_HUMAN_Zinc_finger_protein_Pegasus_OS=Homo_sapiens_OX=9606_GN=IKZF5_PE=1_SV=1
Cluster-1319.0	85.6764	-2.6191	2.95e-08	sp_Q9H1P6_CT085_HUMAN_Uncharacterized_protein_C20orf85_OS=Homo_sapiens_OX=9606_GN=C20orf85_PE=2_SV=1
Cluster-3.1125	7581.02	-1.79327	2.97e-08	sp_P29758_OAT_MOUSE_Ornithine_aminotransferase,_mitochondrial_OS=Mus_musculus_OX=10090_GN=Oat_PE=1_SV=1
Cluster-16110.1	2595.75	-1.4498	2.99e-08	sp_Q06138_CAB39_MOUSE_Calcium-binding_protein_39_OS=Mus_musculus_OX=10090_GN=Cab39_PE=1_SV=2
Cluster-3.1926	3797.79	-1.07949	2.99e-08	sp_Q62703_RCN2_RAT_Reticulocalbin-2_OS=Rattus_norvegicus_OX=10116_GN=Rcn2_PE=1_SV=2
Cluster-11908.0	876.387	-1.89529	3e-08	sp_P63043_STMN4_RAT_Stathmin-4_OS=Rattus_norvegicus_OX=10116_GN=Stmn4_PE=1_SV=1
Cluster-6070.0	5834.4	-1.55275	3.02e-08	sp_Q9PSX7_RHOC_CHICK_Rho-related_GTP-binding_protein_RhoC_OS=Gallus_gallus_OX=9031_GN=RHOC_PE=1_SV=1
Cluster-3.10580	227.01	1.32803	3.05e-08
Cluster-3.7437	91.9779	1.37576	3.06e-08
Cluster-6432.0	103.91	-2.08242	3.07e-08	sp_Q9QUP4_CHST5_MOUSE_Carbohydrate_sulfotransferase_5_OS=Mus_musculus_OX=10090_GN=Chst5_PE=2_SV=1
Cluster-11428.0	495.461	-2.06144	3.08e-08	sp_A1L3G4_TM241_XENLA_Transmembrane_protein_241_OS=Xenopus_laevis_OX=8355_GN=tmem241_PE=2_SV=1
Cluster-3.5787	12295.6	-1.82002	3.11e-08	sp_Q5REG1_SART3_PONAB_Squamous_cell_carcinoma_antigen_recognized_by_T-cells_3_OS=Pongo_abelii_OX=9601_GN=SART3_PE=2_SV=1
Cluster-3.11776	2842.94	-1.81982	3.12e-08	sp_Q9BS26_ERP44_HUMAN_Endoplasmic_reticulum_resident_protein_44_OS=Homo_sapiens_OX=9606_GN=ERP44_PE=1_SV=1
Cluster-3.6010	2264.07	-2.19095	3.12e-08	sp_Q9CZH3_PSMG3_MOUSE_Proteasome_assembly_chaperone_3_OS=Mus_musculus_OX=10090_GN=Psmg3_PE=1_SV=1
Cluster-3.13219	3672.23	-1.62463	3.15e-08	sp_Q9UJX4_APC5_HUMAN_Anaphase-promoting_complex_subunit_5_OS=Homo_sapiens_OX=9606_GN=ANAPC5_PE=1_SV=2
Cluster-11226.0	129.548	-1.66824	3.17e-08	sp_Q8VHQ9_ACO11_MOUSE_Acyl-coenzyme_A_thioesterase_11_OS=Mus_musculus_OX=10090_GN=Acot11_PE=1_SV=1
Cluster-3.10192	74.032	1.62455	3.17e-08	sp_Q08BS4_EZH2_DANRE_Histone-lysine_N-methyltransferase_EZH2_OS=Danio_rerio_OX=7955_GN=ezh2_PE=2_SV=1
Cluster-12719.1	490.608	-1.80762	3.17e-08	sp_Q2NL00_GSTT1_BOVIN_Glutathione_S-transferase_theta-1_OS=Bos_taurus_OX=9913_GN=GSTT1_PE=2_SV=3
Cluster-3.6378	480.903	-2.52634	3.19e-08
Cluster-9086.1	56.2342	-1.86777	3.19e-08	sp_Q9NR80_ARHG4_HUMAN_Rho_guanine_nucleotide_exchange_factor_4_OS=Homo_sapiens_OX=9606_GN=ARHGEF4_PE=1_SV=3
Cluster-5489.0	57.9167	-1.69595	3.19e-08
Cluster-12965.0	975.572	-2.30038	3.2e-08	sp_Q92552_RT27_HUMAN_28S_ribosomal_protein_S27,_mitochondrial_OS=Homo_sapiens_OX=9606_GN=MRPS27_PE=1_SV=3
Cluster-3.6147	7741.16	-1.8657	3.21e-08	sp_O94826_TOM70_HUMAN_Mitochondrial_import_receptor_subunit_TOM70_OS=Homo_sapiens_OX=9606_GN=TOMM70_PE=1_SV=1
Cluster-3.4165	3129.55	-1.51918	3.22e-08	sp_Q99470_SDF2_HUMAN_Stromal_cell-derived_factor_2_OS=Homo_sapiens_OX=9606_GN=SDF2_PE=1_SV=2
Cluster-3.11119	228.949	1.4817	3.22e-08	sp_P11369_LORF2_MOUSE_LINE-1_retrotransposable_element_ORF2_protein_OS=Mus_musculus_OX=10090_GN=Pol_PE=1_SV=2
Cluster-7252.0	215.429	1.12035	3.22e-08
Cluster-4020.0	224.671	-1.49358	3.22e-08	sp_Q6NT16_S18B1_HUMAN_MFS-type_transporter_SLC18B1_OS=Homo_sapiens_OX=9606_GN=SLC18B1_PE=1_SV=1
Cluster-10789.0	931.351	-1.4614	3.23e-08	sp_O00461_GOLI4_HUMAN_Golgi_integral_membrane_protein_4_OS=Homo_sapiens_OX=9606_GN=GOLIM4_PE=1_SV=1
Cluster-3.2653	1002.26	1.44081	3.23e-08
Cluster-3.3112	4465.7	-1.64987	3.26e-08	sp_Q9CYN2_SPCS2_MOUSE_Signal_peptidase_complex_subunit_2_OS=Mus_musculus_OX=10090_GN=Spcs2_PE=1_SV=1
Cluster-13995.0	1488.63	-1.613	3.27e-08	sp_Q9Y4P3_TBL2_HUMAN_Transducin_beta-like_protein_2_OS=Homo_sapiens_OX=9606_GN=TBL2_PE=1_SV=1
Cluster-3.7949	2096.22	-1.228	3.28e-08	sp_Q2T9W9_CAAP1_BOVIN_Caspase_activity_and_apoptosis_inhibitor_1_OS=Bos_taurus_OX=9913_GN=CAAP1_PE=2_SV=1
Cluster-9878.0	4657.44	-1.01271	3.28e-08	sp_P50579_MAP2_HUMAN_Methionine_aminopeptidase_2_OS=Homo_sapiens_OX=9606_GN=METAP2_PE=1_SV=1
Cluster-10542.0	415.18	1.2214	3.3e-08
Cluster-12122.0	859.56	-1.49449	3.3e-08	sp_Q2KIG5_THAS_BOVIN_Thromboxane-A_synthase_OS=Bos_taurus_OX=9913_GN=TBXAS1_PE=2_SV=1
Cluster-13636.0	115.182	-1.69253	3.3e-08
Cluster-3.10530	2288.43	-1.1136	3.3e-08	sp_Q640I9_KDM2B_XENLA_Lysine-specific_demethylase_2B_OS=Xenopus_laevis_OX=8355_GN=kdm2b_PE=2_SV=1
Cluster-6732.0	914.725	-1.35766	3.31e-08
Cluster-4477.0	209.52	-1.38776	3.33e-08	sp_Q5F3L7_T229B_CHICK_Transmembrane_protein_229B_OS=Gallus_gallus_OX=9031_GN=TMEM229B_PE=2_SV=1
Cluster-3.6783	190.389	-2.20405	3.33e-08	sp_B0FPE9_NLRP3_MACMU_NACHT,_LRR_and_PYD_domains-containing_protein_3_OS=Macaca_mulatta_OX=9544_GN=NLRP3_PE=2_SV=1
Cluster-3.6973	83.9192	-2.39196	3.34e-08	sp_Q99JR6_NMNA3_MOUSE_Nicotinamide/nicotinic_acid_mononucleotide_adenylyltransferase_3_OS=Mus_musculus_OX=10090_GN=Nmnat3_PE=1_SV=1
Cluster-3.1860	200.124	2.06911	3.37e-08
Cluster-9712.0	4515.47	-1.7059	3.37e-08	sp_Q5R9V0_NHLC3_PONAB_NHL_repeat-containing_protein_3_OS=Pongo_abelii_OX=9601_GN=NHLRC3_PE=2_SV=1
Cluster-3.11561	2210.02	-1.71146	3.39e-08	sp_Q61496_DDX4_MOUSE_ATP-dependent_RNA_helicase_DDX4_OS=Mus_musculus_OX=10090_GN=Ddx4_PE=1_SV=2
Cluster-3.9400	163.418	1.51147	3.39e-08
Cluster-5020.1	51.139	-1.50324	3.41e-08
Cluster-3.3974	4458.48	-1.33095	3.46e-08
Cluster-3.2210	99.4865	1.36538	3.46e-08
Cluster-13150.0	13268	-2.07956	3.46e-08	sp_O13085_COX6A_ONCMY_Cytochrome_c_oxidase_subunit_6A,_mitochondrial_OS=Oncorhynchus_mykiss_OX=8022_PE=3_SV=1
Cluster-5830.0	596.152	-1.93084	3.51e-08	sp_O60443_GSDME_HUMAN_Gasdermin-E_OS=Homo_sapiens_OX=9606_GN=GSDME_PE=1_SV=2
Cluster-8118.0	97.8613	1.2738	3.51e-08
Cluster-3.9	15955.2	-1.61363	3.54e-08	sp_Q5RAM2_ERR3_PONAB_Estrogen-related_receptor_gamma_OS=Pongo_abelii_OX=9601_GN=ESRRG_PE=2_SV=1
Cluster-3.7318	708.577	-1.17764	3.55e-08	sp_Q6PBF6_GAMT_XENTR_Guanidinoacetate_N-methyltransferase_OS=Xenopus_tropicalis_OX=8364_GN=gamt_PE=2_SV=1
Cluster-8035.0	880.014	-1.80715	3.55e-08	sp_Q5EAD5_PGTB1_BOVIN_Geranylgeranyl_transferase_type-1_subunit_beta_OS=Bos_taurus_OX=9913_GN=PGGT1B_PE=2_SV=1
Cluster-12394.0	1629.7	-1.78408	3.58e-08	sp_Q4R804_STN1_MACFA_CST_complex_subunit_STN1_OS=Macaca_fascicularis_OX=9541_GN=STN1_PE=2_SV=1
Cluster-475.0	397.729	-3.36421	3.6e-08	sp_P15982_HB2C_PIG_SLA_class_II_histocompatibility_antigen,_DQ_haplotype_C_beta_chain_OS=Sus_scrofa_OX=9823_PE=2_SV=1
Cluster-7483.0	4010.64	-2.17459	3.6e-08	sp_Q5ZJ64_EIF3M_CHICK_Eukaryotic_translation_initiation_factor_3_subunit_M_OS=Gallus_gallus_OX=9031_GN=EIF3M_PE=2_SV=1
Cluster-4234.0	35987.3	-1.08801	3.63e-08	sp_O94985_CSTN1_HUMAN_Calsyntenin-1_OS=Homo_sapiens_OX=9606_GN=CLSTN1_PE=1_SV=1
Cluster-3.7447	685.217	1.48415	3.63e-08	sp_O00370_LORF2_HUMAN_LINE-1_retrotransposable_element_ORF2_protein_OS=Homo_sapiens_OX=9606_PE=1_SV=1
Cluster-7802.0	254.659	1.58193	3.63e-08	sp_Q8BHZ4_ZN592_MOUSE_Zinc_finger_protein_592_OS=Mus_musculus_OX=10090_GN=Znf592_PE=1_SV=3
Cluster-11672.0	100.086	1.46888	3.67e-08
Cluster-478.0	4441.11	-1.56028	3.68e-08	sp_P98155_VLDLR_HUMAN_Very_low-density_lipoprotein_receptor_OS=Homo_sapiens_OX=9606_GN=VLDLR_PE=1_SV=1
Cluster-1263.0	941.926	-1.47269	3.7e-08	sp_Q60HF6_BGAL_MACFA_Beta-galactosidase_OS=Macaca_fascicularis_OX=9541_GN=GLB1_PE=2_SV=1
Cluster-7220.0	432.178	-1.14824	3.71e-08	sp_Q91V88_NPNT_MOUSE_Nephronectin_OS=Mus_musculus_OX=10090_GN=Npnt_PE=1_SV=1
Cluster-2868.0	2812.82	-1.71027	3.72e-08	sp_O09111_NDUBB_MOUSE_NADH_dehydrogenase_[ubiquinone]_1_beta_subcomplex_subunit_11,_mitochondrial_OS=Mus_musculus_OX=10090_GN=Ndufb11_PE=1_SV=2
Cluster-16468.0	1180.33	-2.1611	3.76e-08	sp_Q9NUQ7_UFSP2_HUMAN_Ufm1-specific_protease_2_OS=Homo_sapiens_OX=9606_GN=UFSP2_PE=1_SV=3
Cluster-3.3669	137.904	1.28301	3.77e-08	sp_O00370_LORF2_HUMAN_LINE-1_retrotransposable_element_ORF2_protein_OS=Homo_sapiens_OX=9606_PE=1_SV=1
Cluster-311.0	2016.7	-1.9592	3.78e-08	sp_Q28F39_CC134_XENTR_Coiled-coil_domain-containing_protein_134_OS=Xenopus_tropicalis_OX=8364_GN=ccdc134_PE=2_SV=1
Cluster-3.4691	2077.36	-1.90889	3.79e-08	sp_Q5M7W6_F234A_RAT_Protein_FAM234A_OS=Rattus_norvegicus_OX=10116_GN=Fam234a_PE=1_SV=1
Cluster-7495.0	741.375	-1.80635	3.8e-08	sp_Q86T90_K1328_HUMAN_Protein_hinderin_OS=Homo_sapiens_OX=9606_GN=KIAA1328_PE=1_SV=2
Cluster-3.11672	1153.08	1.11327	3.84e-08
Cluster-8344.0	1015.2	-2.23311	3.87e-08	sp_Q4V9P6_ADAL_DANRE_Adenosine_deaminase-like_protein_OS=Danio_rerio_OX=7955_GN=adal_PE=2_SV=1
Cluster-8432.0	998.463	-1.7912	3.87e-08	sp_Q5EA92_AL14E_BOVIN_ARL14_effector_protein_OS=Bos_taurus_OX=9913_GN=ARL14EP_PE=2_SV=1
Cluster-3.6058	227.168	1.49776	3.9e-08	sp_O00370_LORF2_HUMAN_LINE-1_retrotransposable_element_ORF2_protein_OS=Homo_sapiens_OX=9606_PE=1_SV=1
Cluster-6161.0	1586.81	-1.98323	3.9e-08	sp_A6QLH5_ERI3_BOVIN_ERI1_exoribonuclease_3_OS=Bos_taurus_OX=9913_GN=ERI3_PE=2_SV=1
Cluster-3.8691	1239.06	-1.71182	3.91e-08	sp_Q6ZM63_GPN3_DANRE_GPN-loop_GTPase_3_OS=Danio_rerio_OX=7955_GN=gpn3_PE=2_SV=2
Cluster-7006.1	74.0441	-2.06322	3.92e-08	sp_Q9CQL2_CCER1_MOUSE_Coiled-coil_domain-containing_glutamate-rich_protein_1_OS=Mus_musculus_OX=10090_GN=Ccer1_PE=2_SV=1
Cluster-11262.0	92.6935	1.66005	3.93e-08	sp_Q9Y219_JAG2_HUMAN_Protein_jagged-2_OS=Homo_sapiens_OX=9606_GN=JAG2_PE=1_SV=3
Cluster-3.2521	635.418	1.37577	3.93e-08	sp_Q8BTK5_SMYD4_MOUSE_SET_and_MYND_domain-containing_protein_4_OS=Mus_musculus_OX=10090_GN=Smyd4_PE=2_SV=2
Cluster-3.3464	32269.8	-1.12153	3.94e-08
Cluster-3.7630	14887.8	-1.15805	3.95e-08	sp_Q7SXR3_MAEA_DANRE_Macrophage_erythroblast_attacher_OS=Danio_rerio_OX=7955_GN=maea_PE=2_SV=2
Cluster-3.6765	77.8588	1.44741	3.95e-08
Cluster-6553.1	833.63	1.44061	3.96e-08	sp_Q66JW3_TOX_MOUSE_Thymocyte_selection-associated_high_mobility_group_box_protein_TOX_OS=Mus_musculus_OX=10090_GN=Tox_PE=1_SV=2
Cluster-3.12154	723.251	-2.28621	3.97e-08	sp_Q5RF34_TIM14_PONAB_Mitochondrial_import_inner_membrane_translocase_subunit_TIM14_OS=Pongo_abelii_OX=9601_GN=DNAJC19_PE=3_SV=3
Cluster-3.12785	497.765	1.08297	3.97e-08
Cluster-3827.0	267.205	-1.80991	3.97e-08	sp_A6QLK6_GRAP_BOVIN_GRB2-related_adapter_protein_OS=Bos_taurus_OX=9913_GN=GRAP_PE=2_SV=1
Cluster-3.7098	4900.06	-1.25768	4.02e-08	sp_G5E829_AT2B1_MOUSE_Plasma_membrane_calcium-transporting_ATPase_1_OS=Mus_musculus_OX=10090_GN=Atp2b1_PE=1_SV=1
Cluster-261.0	149.677	2.27911	4.07e-08
Cluster-11284.0	9105.85	-2.11451	4.09e-08	sp_A7MB35_ODPA_BOVIN_Pyruvate_dehydrogenase_E1_component_subunit_alpha,_somatic_form,_mitochondrial_OS=Bos_taurus_OX=9913_GN=PDHA1_PE=2_SV=1
Cluster-3.5008	1019.58	1.13734	4.1e-08	sp_O35435_PYRD_MOUSE_Dihydroorotate_dehydrogenase_(quinone),_mitochondrial_OS=Mus_musculus_OX=10090_GN=Dhodh_PE=1_SV=2
Cluster-16730.0	1318.46	-1.12126	4.11e-08	sp_P62699_YPEL5_HUMAN_Protein_yippee-like_5_OS=Homo_sapiens_OX=9606_GN=YPEL5_PE=1_SV=1
Cluster-3.8148	561.034	-1.25184	4.12e-08	sp_Q90W95_PTPS_POERE_6-pyruvoyl_tetrahydrobiopterin_synthase_OS=Poecilia_reticulata_OX=8081_GN=pts_PE=2_SV=1
Cluster-5868.1	775.334	-1.98448	4.13e-08	sp_Q5ZIA0_MET16_CHICK_U6_small_nuclear_RNA_(adenine-(43)-N(6))-methyltransferase_OS=Gallus_gallus_OX=9031_GN=METTL16_PE=2_SV=1
Cluster-9699.0	107.494	-1.4832	4.14e-08	sp_Q9NRD0_FBX8_HUMAN_F-box_only_protein_8_OS=Homo_sapiens_OX=9606_GN=FBXO8_PE=2_SV=1
Cluster-10278.0	91.7898	1.15112	4.15e-08
Cluster-15338.1	1600.91	-1.02579	4.17e-08	sp_O43493_TGON2_HUMAN_Trans-Golgi_network_integral_membrane_protein_2_OS=Homo_sapiens_OX=9606_GN=TGOLN2_PE=1_SV=3
Cluster-14548.0	434.137	-1.73713	4.19e-08	sp_Q8HZY8_CC148_MACFA_Coiled-coil_domain-containing_protein_148_OS=Macaca_fascicularis_OX=9541_GN=CCDC148_PE=2_SV=1
Cluster-9511.0	283.767	1.45361	4.22e-08	sp_O75077_ADA23_HUMAN_Disintegrin_and_metalloproteinase_domain-containing_protein_23_OS=Homo_sapiens_OX=9606_GN=ADAM23_PE=1_SV=1
Cluster-14450.0	4676.87	-2.3393	4.23e-08	sp_Q4R8W3_TNAP3_MACFA_Tumor_necrosis_factor_alpha-induced_protein_3_OS=Macaca_fascicularis_OX=9541_GN=TNFAIP3_PE=2_SV=1
Cluster-3.11446	149.266	-2.40988	4.23e-08	sp_P0DO97_CC192_HUMAN_Coiled-coil_domain-containing_protein_192_OS=Homo_sapiens_OX=9606_GN=CCDC192_PE=4_SV=1
Cluster-3.2461	302.064	-3.12435	4.23e-08
Cluster-3.3117	1791.07	-1.87473	4.26e-08	sp_P21262_SRP09_CANLF_Signal_recognition_particle_9_kDa_protein_OS=Canis_lupus_familiaris_OX=9615_GN=SRP9_PE=1_SV=2
Cluster-16320.0	1242.76	-1.79609	4.28e-08	sp_Q6DGL8_RT15_DANRE_28S_ribosomal_protein_S15,_mitochondrial_OS=Danio_rerio_OX=7955_GN=mrps15_PE=2_SV=1
Cluster-3.12121	1973.34	-1.72169	4.28e-08	sp_P15374_UCHL3_HUMAN_Ubiquitin_carboxyl-terminal_hydrolase_isozyme_L3_OS=Homo_sapiens_OX=9606_GN=UCHL3_PE=1_SV=1
Cluster-13586.0	1028.83	-1.61732	4.32e-08	sp_Q60736_ZP3R_MOUSE_Zona_pellucida_sperm-binding_protein_3_receptor_OS=Mus_musculus_OX=10090_GN=Zp3r_PE=1_SV=1
Cluster-3.8535	92.8598	1.27874	4.34e-08
Cluster-3.8303	4296.7	-2.20107	4.34e-08	sp_P60896_SEM1_HUMAN_26S_proteasome_complex_subunit_SEM1_OS=Homo_sapiens_OX=9606_GN=SEM1_PE=1_SV=1
Cluster-6384.1	1270.31	-1.3528	4.36e-08	sp_Q3SXM5_HSDL1_HUMAN_Inactive_hydroxysteroid_dehydrogenase-like_protein_1_OS=Homo_sapiens_OX=9606_GN=HSDL1_PE=1_SV=3
Cluster-15850.0	218.811	-2.31023	4.39e-08	sp_A6H694_LRC63_MOUSE_Leucine-rich_repeat-containing_protein_63_OS=Mus_musculus_OX=10090_GN=Lrrc63_PE=2_SV=1
Cluster-3.6908	895.597	1.45362	4.4e-08	sp_A5PN09_UBP20_DANRE_Ubiquitin_carboxyl-terminal_hydrolase_20_OS=Danio_rerio_OX=7955_GN=usp20_PE=3_SV=1
Cluster-11388.0	81.0626	-1.39992	4.4e-08
Cluster-13705.0	1270.99	-1.49883	4.41e-08	sp_P53367_ARFP1_HUMAN_Arfaptin-1_OS=Homo_sapiens_OX=9606_GN=ARFIP1_PE=1_SV=2
Cluster-12504.0	679.895	-1.35123	4.44e-08	sp_A4QNX3_CF089_DANRE_Bombesin_receptor-activated_protein_C6orf89_homolog_OS=Danio_rerio_OX=7955_GN=zgc:162255_PE=2_SV=1
Cluster-3.10517	407.558	-1.26055	4.45e-08	sp_Q6PE13_PRRT3_MOUSE_Proline-rich_transmembrane_protein_3_OS=Mus_musculus_OX=10090_GN=Prrt3_PE=1_SV=1
Cluster-3.2551	5675.19	-4.31814	4.55e-08	sp_P20939_MBP_HETFR_Myelin_basic_protein_OS=Heterodontus_francisci_OX=7792_GN=MBP_PE=2_SV=2
Cluster-2929.0	113.438	-1.34702	4.57e-08	sp_Q6NWH0_CK068_DANRE_UPF0696_protein_C11orf68_homolog_OS=Danio_rerio_OX=7955_GN=P5436_PE=2_SV=1
Cluster-11994.1	429.223	-1.65032	4.58e-08	sp_P82931_RT06_BOVIN_28S_ribosomal_protein_S6,_mitochondrial_OS=Bos_taurus_OX=9913_GN=MRPS6_PE=1_SV=4
Cluster-7739.0	166.813	1.70394	4.58e-08
Cluster-2283.0	4132.29	-1.4451	4.64e-08	sp_Q5EB77_RAB18_RAT_Ras-related_protein_Rab-18_OS=Rattus_norvegicus_OX=10116_GN=Rab18_PE=2_SV=1
Cluster-7412.0	65.0345	1.49358	4.64e-08	sp_Q9BXW9_FACD2_HUMAN_Fanconi_anemia_group_D2_protein_OS=Homo_sapiens_OX=9606_GN=FANCD2_PE=1_SV=2
Cluster-7455.0	119.839	1.91835	4.65e-08
Cluster-9330.1	302.792	-1.10528	4.65e-08	sp_Q6P1Y8_INP4B_MOUSE_Type_II_inositol_3,4-bisphosphate_4-phosphatase_OS=Mus_musculus_OX=10090_GN=Inpp4b_PE=2_SV=1
Cluster-7966.0	6145.79	-2.02081	4.67e-08	sp_Q5RBB3_NOB1_PONAB_RNA-binding_protein_NOB1_OS=Pongo_abelii_OX=9601_GN=NOB1_PE=2_SV=1
Cluster-13488.0	2504.89	-1.49041	4.67e-08	sp_Q9D1L0_CHCH2_MOUSE_Coiled-coil-helix-coiled-coil-helix_domain-containing_protein_2_OS=Mus_musculus_OX=10090_GN=Chchd2_PE=2_SV=1
Cluster-3083.0	1094.77	-1.44032	4.73e-08	sp_Q6P6Z4_CK2N2_XENLA_Calcium/calmodulin-dependent_protein_kinase_II_inhibitor_2_OS=Xenopus_laevis_OX=8355_GN=camk2n2_PE=3_SV=1
Cluster-11882.0	6146.84	-1.96815	4.73e-08	sp_Q63406_MCF2L_RAT_Guanine_nucleotide_exchange_factor_DBS_OS=Rattus_norvegicus_OX=10116_GN=Mcf2l_PE=1_SV=3
Cluster-6399.0	193.277	1.32631	4.73e-08
Cluster-16548.0	11013.2	-1.62024	4.77e-08	sp_Q5TM18_VATG2_MACMU_V-type_proton_ATPase_subunit_G_2_OS=Macaca_mulatta_OX=9544_GN=ATP6V1G2_PE=3_SV=1
Cluster-10396.0	130.407	-2.52257	4.85e-08	sp_Q05962_ADT1_RAT_ADP/ATP_translocase_1_OS=Rattus_norvegicus_OX=10116_GN=Slc25a4_PE=1_SV=3
Cluster-5762.0	646.893	-3.24907	4.85e-08	sp_P12259_FA5_HUMAN_Coagulation_factor_V_OS=Homo_sapiens_OX=9606_GN=F5_PE=1_SV=4
Cluster-16288.0	407.106	-2.11476	4.85e-08	sp_Q642A0_PDRG1_RAT_p53_and_DNA_damage-regulated_protein_1_OS=Rattus_norvegicus_OX=10116_GN=Pdrg1_PE=2_SV=2
Cluster-3867.0	74.1876	1.96996	4.87e-08
Cluster-14680.0	595.213	-1.11084	4.89e-08	sp_Q9WUZ9_ENTP5_MOUSE_Ectonucleoside_triphosphate_diphosphohydrolase_5_OS=Mus_musculus_OX=10090_GN=Entpd5_PE=1_SV=1
Cluster-3.1793	849.895	-1.0352	4.92e-08	sp_Q9JL15_LEG8_MOUSE_Galectin-8_OS=Mus_musculus_OX=10090_GN=Lgals8_PE=1_SV=1
Cluster-11763.0	1736.24	-1.23915	4.92e-08	sp_Q5SV17_TM240_HUMAN_Transmembrane_protein_240_OS=Homo_sapiens_OX=9606_GN=TMEM240_PE=1_SV=2
Cluster-11971.0	1521.82	-2.27619	4.95e-08	sp_Q6GPY0_TI13A_XENLA_Mitochondrial_import_inner_membrane_translocase_subunit_Tim13-A_OS=Xenopus_laevis_OX=8355_GN=timm13-a_PE=3_SV=2
Cluster-9365.0	343.248	-1.30831	4.96e-08
Cluster-3013.0	2205.12	-1.64592	4.97e-08	sp_J3SDX8_LICH_CROAD_Putative_lysosomal_acid_lipase/cholesteryl_ester_hydrolase_OS=Crotalus_adamanteus_OX=8729_PE=2_SV=1
Cluster-14722.0	884.726	-1.79263	4.97e-08	sp_Q6NTS3_RT24A_XENLA_28S_ribosomal_protein_S24-A,_mitochondrial_OS=Xenopus_laevis_OX=8355_GN=mrps24-a_PE=2_SV=1
Cluster-3.10275	314.176	-1.6341	4.99e-08	sp_Q9JLU8_TF_CAVPO_Tissue_factor_OS=Cavia_porcellus_OX=10141_GN=F3_PE=2_SV=1
Cluster-3.586	670.593	-1.94427	5e-08	sp_Q9BQ24_ZFY21_HUMAN_Zinc_finger_FYVE_domain-containing_protein_21_OS=Homo_sapiens_OX=9606_GN=ZFYVE21_PE=1_SV=1
Cluster-3.7890	3194.14	-1.10218	5.03e-08	sp_Q3ZBE5_SLU7_BOVIN_Pre-mRNA-splicing_factor_SLU7_OS=Bos_taurus_OX=9913_GN=SLU7_PE=2_SV=2
Cluster-3029.1	7506.84	-1.80242	5.03e-08	sp_Q7T385_VTC1A_DANRE_V-type_proton_ATPase_subunit_C_1-A_OS=Danio_rerio_OX=7955_GN=atp6v1c1a_PE=2_SV=1
Cluster-3.1235	5364.72	-1.81676	5.05e-08	sp_Q2KJC9_AL7A1_BOVIN_Alpha-aminoadipic_semialdehyde_dehydrogenase_OS=Bos_taurus_OX=9913_GN=ALDH7A1_PE=2_SV=4
Cluster-12479.0	2680	-2.30638	5.05e-08	sp_P23935_NDUA5_BOVIN_NADH_dehydrogenase_[ubiquinone]_1_alpha_subcomplex_subunit_5_OS=Bos_taurus_OX=9913_GN=NDUFA5_PE=1_SV=3
Cluster-2568.0	636.273	1.11068	5.06e-08	sp_Q8IZL2_MAML2_HUMAN_Mastermind-like_protein_2_OS=Homo_sapiens_OX=9606_GN=MAML2_PE=1_SV=2
Cluster-4082.0	107.604	-2.32055	5.07e-08	sp_Q5RCH2_PDIA2_PONAB_Protein_disulfide-isomerase_A2_OS=Pongo_abelii_OX=9601_GN=PDIA2_PE=2_SV=1
Cluster-15345.0	548.499	1.28777	5.08e-08	sp_Q04724_TLE1_HUMAN_Transducin-like_enhancer_protein_1_OS=Homo_sapiens_OX=9606_GN=TLE1_PE=1_SV=2
Cluster-3.11592	648.633	-1.95442	5.09e-08	sp_Q8N7B6_PACRL_HUMAN_PACRG-like_protein_OS=Homo_sapiens_OX=9606_GN=PACRGL_PE=1_SV=2
Cluster-3.1544	707.635	2.09137	5.12e-08
Cluster-3.6334	177.693	-1.63458	5.12e-08	sp_A1YF12_ZNF16_GORGO_Zinc_finger_protein_16_OS=Gorilla_gorilla_gorilla_OX=9595_GN=ZNF16_PE=3_SV=1
Cluster-6007.2	663.728	-1.99381	5.13e-08	sp_Q0IHF8_PDPFB_XENLA_Pancreatic_progenitor_cell_differentiation_and_proliferation_factor_B_OS=Xenopus_laevis_OX=8355_GN=ppdpf-b_PE=3_SV=1
Cluster-14693.0	4500.96	-1.91291	5.13e-08	sp_Q92562_FIG4_HUMAN_Polyphosphoinositide_phosphatase_OS=Homo_sapiens_OX=9606_GN=FIG4_PE=1_SV=1
Cluster-7401.0	409.688	-1.70133	5.15e-08	sp_Q0V9C8_KXDL1_XENTR_KxDL_motif-containing_protein_1_OS=Xenopus_tropicalis_OX=8364_GN=kxd1_PE=2_SV=2
Cluster-3.8675	76.5108	1.72026	5.18e-08
Cluster-16647.1	167.903	-2.1768	5.2e-08	sp_Q6NT99_DUS23_MOUSE_Dual_specificity_protein_phosphatase_23_OS=Mus_musculus_OX=10090_GN=Dusp23_PE=1_SV=1
Cluster-3.706	2064.55	-1.9093	5.2e-08	sp_Q9BW85_CCD94_HUMAN_Coiled-coil_domain-containing_protein_94_OS=Homo_sapiens_OX=9606_GN=CCDC94_PE=1_SV=1
Cluster-713.0	290.238	-1.85589	5.22e-08	sp_Q5ZKB8_CDPF1_CHICK_Cysteine-rich_DPF_motif_domain-containing_protein_1_OS=Gallus_gallus_OX=9031_GN=CDPF1_PE=2_SV=1
Cluster-3.11204	13757.8	-2.39214	5.23e-08	sp_P17665_COX7C_MOUSE_Cytochrome_c_oxidase_subunit_7C,_mitochondrial_OS=Mus_musculus_OX=10090_GN=Cox7c_PE=1_SV=1
Cluster-11772.0	2911.36	-1.80282	5.24e-08	sp_Q7M6Y3_PICAL_MOUSE_Phosphatidylinositol-binding_clathrin_assembly_protein_OS=Mus_musculus_OX=10090_GN=Picalm_PE=1_SV=1
Cluster-3368.0	2755.45	-1.79301	5.24e-08	sp_Q8BXJ8_Z385B_MOUSE_Zinc_finger_protein_385B_OS=Mus_musculus_OX=10090_GN=Znf385b_PE=2_SV=1
Cluster-5262.0	1287.3	-2.33263	5.24e-08	sp_Q9UNP9_PPIE_HUMAN_Peptidyl-prolyl_cis-trans_isomerase_E_OS=Homo_sapiens_OX=9606_GN=PPIE_PE=1_SV=1
Cluster-8011.0	836.529	-1.18092	5.26e-08	sp_Q3ZBL5_PTH2_BOVIN_Peptidyl-tRNA_hydrolase_2,_mitochondrial_OS=Bos_taurus_OX=9913_GN=PTRH2_PE=2_SV=1
Cluster-8635.0	128.293	-1.12237	5.26e-08	sp_P56542_DNS2A_MOUSE_Deoxyribonuclease-2-alpha_OS=Mus_musculus_OX=10090_GN=Dnase2_PE=1_SV=1
Cluster-15501.0	10802.7	-1.19612	5.28e-08	sp_E1C1R4_UBP47_CHICK_Ubiquitin_carboxyl-terminal_hydrolase_47_OS=Gallus_gallus_OX=9031_GN=USP47_PE=3_SV=1
Cluster-6063.1	4126.03	-1.49084	5.29e-08	sp_A0A0G2JXN2_TRI46_RAT_Tripartite_motif-containing_protein_46_OS=Rattus_norvegicus_OX=10116_GN=Trim46_PE=1_SV=2
Cluster-4212.0	1421.84	-1.63447	5.29e-08	sp_P38117_ETFB_HUMAN_Electron_transfer_flavoprotein_subunit_beta_OS=Homo_sapiens_OX=9606_GN=ETFB_PE=1_SV=3
Cluster-13044.0	12153.2	-2.22334	5.29e-08	sp_B2B9A1_ATPO_RHIFE_ATP_synthase_subunit_O,_mitochondrial_OS=Rhinolophus_ferrumequinum_OX=59479_GN=ATP5O_PE=3_SV=1
Cluster-4752.0	8640.24	-1.9779	5.29e-08	sp_P22125_RAB1_DIPOM_Ras-related_protein_ORAB-1_OS=Diplobatis_ommata_OX=1870830_PE=2_SV=1
Cluster-13717.0	2045.02	-1.53634	5.3e-08	sp_Q8R3L8_CDK8_MOUSE_Cyclin-dependent_kinase_8_OS=Mus_musculus_OX=10090_GN=Cdk8_PE=1_SV=3
Cluster-3.10873	138.461	1.34948	5.31e-08
Cluster-3.3400	1326.05	-1.30185	5.31e-08	sp_P45700_MA1A1_MOUSE_Mannosyl-oligosaccharide_1,2-alpha-mannosidase_IA_OS=Mus_musculus_OX=10090_GN=Man1a1_PE=1_SV=1
Cluster-3.633	145.793	-1.74486	5.31e-08
Cluster-15965.0	924.399	-1.63255	5.32e-08	sp_Q8WV99_ZFN2B_HUMAN_AN1-type_zinc_finger_protein_2B_OS=Homo_sapiens_OX=9606_GN=ZFAND2B_PE=1_SV=1
Cluster-3.1851	2144.1	-1.21935	5.36e-08	sp_P40329_SYRC_RAT_Arginine--tRNA_ligase,_cytoplasmic_OS=Rattus_norvegicus_OX=10116_GN=Rars_PE=1_SV=2
Cluster-9001.1	165.068	-2.10829	5.42e-08	sp_Q9JJM9_SEPT5_RAT_Septin-5_OS=Rattus_norvegicus_OX=10116_GN=Sept5_PE=1_SV=2
Cluster-3.3568	441.93	1.33054	5.45e-08
Cluster-4511.0	1932.3	-1.48904	5.49e-08	sp_Q14206_RCAN2_HUMAN_Calcipressin-2_OS=Homo_sapiens_OX=9606_GN=RCAN2_PE=2_SV=3
Cluster-9610.0	70.8091	1.2285	5.49e-08
Cluster-3098.0	172.857	-1.76577	5.5e-08	sp_P51810_GP143_HUMAN_G-protein_coupled_receptor_143_OS=Homo_sapiens_OX=9606_GN=GPR143_PE=1_SV=2
Cluster-152.0	3149.29	-1.96849	5.51e-08	sp_Q6P635_CSN5_XENTR_COP9_signalosome_complex_subunit_5_OS=Xenopus_tropicalis_OX=8364_GN=cops5_PE=2_SV=1
Cluster-3711.0	72.2079	2.90697	5.53e-08
Cluster-3.4539	69.9198	-1.75295	5.57e-08
Cluster-9073.0	603.858	-1.85638	5.57e-08	sp_Q5T089_MORN1_HUMAN_MORN_repeat-containing_protein_1_OS=Homo_sapiens_OX=9606_GN=MORN1_PE=2_SV=2
Cluster-13535.0	350.196	-1.2184	5.59e-08
Cluster-3.2897	612.845	1.06743	5.6e-08	sp_O88736_DHB7_MOUSE_3-keto-steroid_reductase_OS=Mus_musculus_OX=10090_GN=Hsd17b7_PE=1_SV=1
Cluster-4684.0	2846.35	-1.26043	5.61e-08	sp_Q9QY36_NAA10_MOUSE_N-alpha-acetyltransferase_10_OS=Mus_musculus_OX=10090_GN=Naa10_PE=1_SV=1
Cluster-11596.0	803.085	-1.84247	5.62e-08	sp_Q9CWY4_GEMI7_MOUSE_Gem-associated_protein_7_OS=Mus_musculus_OX=10090_GN=Gemin7_PE=2_SV=1
Cluster-3.4852	2093.15	-1.87361	5.64e-08	sp_P00428_COX5B_BOVIN_Cytochrome_c_oxidase_subunit_5B,_mitochondrial_OS=Bos_taurus_OX=9913_GN=COX5B_PE=1_SV=2
Cluster-3.5446	212.946	1.95315	5.64e-08
Cluster-3.7843	75.3211	1.60154	5.65e-08	sp_O00370_LORF2_HUMAN_LINE-1_retrotransposable_element_ORF2_protein_OS=Homo_sapiens_OX=9606_PE=1_SV=1
Cluster-12060.1	1455.62	-1.86269	5.66e-08	sp_Q7SYR1_OSGEP_XENLA_Probable_tRNA_N6-adenosine_threonylcarbamoyltransferase_OS=Xenopus_laevis_OX=8355_GN=osgep_PE=2_SV=1
Cluster-3.6288	6943.98	-1.52445	5.71e-08	sp_Q9H3K2_GHITM_HUMAN_Growth_hormone-inducible_transmembrane_protein_OS=Homo_sapiens_OX=9606_GN=GHITM_PE=1_SV=2
Cluster-3935.0	433.7	1.05734	5.72e-08	sp_P47743_GRM8_MOUSE_Metabotropic_glutamate_receptor_8_OS=Mus_musculus_OX=10090_GN=Grm8_PE=1_SV=2
Cluster-13104.0	118.331	1.59129	5.77e-08
Cluster-2553.2	54.2028	-2.04057	5.77e-08	sp_Q2M2Z5_KIZ_HUMAN_Centrosomal_protein_kizuna_OS=Homo_sapiens_OX=9606_GN=KIZ_PE=1_SV=2
Cluster-3.3467	5496.54	-1.49198	5.78e-08	sp_Q9BXK5_B2L13_HUMAN_Bcl-2-like_protein_13_OS=Homo_sapiens_OX=9606_GN=BCL2L13_PE=1_SV=1
Cluster-3.10152	17616.6	-2.31345	5.79e-08	sp_P0CB50_PRDX1_CHICK_Peroxiredoxin-1_OS=Gallus_gallus_OX=9031_GN=PRDX1_PE=1_SV=1
Cluster-9140.0	312.395	-1.60242	5.84e-08	sp_Q9ULV1_FZD4_HUMAN_Frizzled-4_OS=Homo_sapiens_OX=9606_GN=FZD4_PE=1_SV=2
Cluster-4111.0	108.149	1.17472	5.86e-08
Cluster-9923.0	62.9395	2.07406	5.88e-08
Cluster-15969.0	63.6808	1.93663	5.91e-08	sp_Q5XG21_CCA5B_XENLA_Sororin-B_OS=Xenopus_laevis_OX=8355_GN=cdca5-b_PE=1_SV=1
Cluster-3.7007	59.6358	1.36489	5.93e-08
Cluster-3.10845	66.0329	2.42918	5.96e-08
Cluster-10929.0	946.123	-2.13594	5.98e-08	sp_Q8K2P1_LUR1L_MOUSE_Leucine_rich_adaptor_protein_1-like_OS=Mus_musculus_OX=10090_GN=Lurap1l_PE=1_SV=1
Cluster-3.4257	83.3033	1.32533	5.98e-08
Cluster-9310.0	99.6285	1.79093	6e-08	sp_P51960_MYBA_MOUSE_Myb-related_protein_A_OS=Mus_musculus_OX=10090_GN=Mybl1_PE=1_SV=2
Cluster-3.262	3732.99	-1.27557	6.01e-08	sp_Q9H6B1_Z385D_HUMAN_Zinc_finger_protein_385D_OS=Homo_sapiens_OX=9606_GN=ZNF385D_PE=2_SV=1
Cluster-160.0	1201.2	-1.9937	6.01e-08	sp_Q64559_BACH_RAT_Cytosolic_acyl_coenzyme_A_thioester_hydrolase_OS=Rattus_norvegicus_OX=10116_GN=Acot7_PE=1_SV=4
Cluster-9347.0	2784.72	1.01707	6.01e-08	sp_Q99PE9_ARL4D_MOUSE_ADP-ribosylation_factor-like_protein_4D_OS=Mus_musculus_OX=10090_GN=Arl4d_PE=2_SV=2
Cluster-1988.0	65.0587	-2.20265	6.04e-08	sp_Q69Z23_DYH17_MOUSE_Dynein_heavy_chain_17,_axonemal_OS=Mus_musculus_OX=10090_GN=Dnah17_PE=1_SV=2
Cluster-3.12161	947.383	-1.60114	6.05e-08	sp_O14907_TX1B3_HUMAN_Tax1-binding_protein_3_OS=Homo_sapiens_OX=9606_GN=TAX1BP3_PE=1_SV=2
Cluster-3.8676	3752.46	-1.68602	6.07e-08	sp_P51596_GCH1_ONCMY_GTP_cyclohydrolase_1_(Fragment)_OS=Oncorhynchus_mykiss_OX=8022_GN=gch1_PE=2_SV=1
Cluster-9734.0	803.94	-1.78899	6.07e-08	sp_Q96LT7_CI072_HUMAN_Guanine_nucleotide_exchange_C9orf72_OS=Homo_sapiens_OX=9606_GN=C9orf72_PE=1_SV=2
Cluster-3.7918	1982.44	-2.02575	6.1e-08	sp_Q08DW2_KPRA_BOVIN_Phosphoribosyl_pyrophosphate_synthase-associated_protein_1_OS=Bos_taurus_OX=9913_GN=PRPSAP1_PE=2_SV=1
Cluster-2739.0	135.115	-2.71657	6.12e-08	sp_Q9CQE5_RGS10_MOUSE_Regulator_of_G-protein_signaling_10_OS=Mus_musculus_OX=10090_GN=Rgs10_PE=1_SV=1
Cluster-8499.1	83.3034	-1.95101	6.12e-08	sp_Q8NCS4_TM35B_HUMAN_Transmembrane_protein_35B_OS=Homo_sapiens_OX=9606_GN=TMEM35B_PE=1_SV=1
Cluster-3.12998	356.296	1.23914	6.13e-08	sp_Q6ZXD2_SIA8A_BOVIN_Alpha-N-acetylneuraminide_alpha-2,8-sialyltransferase_OS=Bos_taurus_OX=9913_GN=ST8SIA1_PE=2_SV=1
Cluster-3.5129	7447.51	-1.87006	6.13e-08	sp_P24643_CALX_CANLF_Calnexin_OS=Canis_lupus_familiaris_OX=9615_GN=CANX_PE=1_SV=3
Cluster-11291.0	3979.87	-1.7683	6.27e-08
Cluster-3.1421	132.345	-1.48614	6.29e-08	sp_A7MBI0_PACN1_BOVIN_Protein_kinase_C_and_casein_kinase_substrate_in_neurons_protein_1_OS=Bos_taurus_OX=9913_GN=PACSIN1_PE=2_SV=1
Cluster-9507.0	205.969	1.46946	6.29e-08
Cluster-16744.0	2167.05	-1.88475	6.33e-08	sp_Q8C669_PELI1_MOUSE_E3_ubiquitin-protein_ligase_pellino_homolog_1_OS=Mus_musculus_OX=10090_GN=Peli1_PE=1_SV=2
Cluster-2640.0	93.0649	-2.42481	6.34e-08	sp_P49638_TTPA_HUMAN_Alpha-tocopherol_transfer_protein_OS=Homo_sapiens_OX=9606_GN=TTPA_PE=1_SV=1
Cluster-3.9054	825.87	1.03632	6.35e-08
Cluster-3.8004	5900.88	-1.00691	6.36e-08	sp_Q9P2D0_IBTK_HUMAN_Inhibitor_of_Bruton_tyrosine_kinase_OS=Homo_sapiens_OX=9606_GN=IBTK_PE=1_SV=3
Cluster-14968.0	908.461	-2.14703	6.39e-08	sp_Q68EL3_BET1L_DANRE_BET1-like_protein_OS=Danio_rerio_OX=7955_GN=bet1l_PE=3_SV=1
Cluster-16741.0	288.674	1.48297	6.39e-08	sp_O93343_GBP_XENLA_GSK-3-binding_protein_OS=Xenopus_laevis_OX=8355_GN=gbp_PE=1_SV=1
Cluster-5633.0	1069.49	-1.35333	6.39e-08
Cluster-12156.0	3865.8	-1.93703	6.41e-08	sp_Q3MHN0_PSB6_BOVIN_Proteasome_subunit_beta_type-6_OS=Bos_taurus_OX=9913_GN=PSMB6_PE=1_SV=1
Cluster-14660.1	3991.18	-1.89703	6.52e-08	sp_Q2HJH9_PDCD5_BOVIN_Programmed_cell_death_protein_5_OS=Bos_taurus_OX=9913_GN=PDCD5_PE=2_SV=3
Cluster-3.2069	82.1098	1.33124	6.52e-08
Cluster-9129.1	1880.78	-1.66596	6.53e-08	sp_P80370_DLK1_HUMAN_Protein_delta_homolog_1_OS=Homo_sapiens_OX=9606_GN=DLK1_PE=1_SV=3
Cluster-6601.0	69.2221	1.2582	6.55e-08	sp_O00370_LORF2_HUMAN_LINE-1_retrotransposable_element_ORF2_protein_OS=Homo_sapiens_OX=9606_PE=1_SV=1
Cluster-11655.0	597.211	-1.19361	6.61e-08	sp_Q6ZRR5_TM136_HUMAN_Transmembrane_protein_136_OS=Homo_sapiens_OX=9606_GN=TMEM136_PE=2_SV=2
Cluster-7521.0	441.511	-2.38931	6.61e-08	sp_Q5F477_LDAH_CHICK_Lipid_droplet-associated_hydrolase_OS=Gallus_gallus_OX=9031_GN=LDAH_PE=2_SV=2
Cluster-3.11222	56.1039	1.6643	6.61e-08
Cluster-3.10137	257.018	1.17715	6.65e-08	sp_Q80VJ8_KASH5_MOUSE_Protein_KASH5_OS=Mus_musculus_OX=10090_GN=Ccdc155_PE=1_SV=3
Cluster-3.714	11166.8	-1.10013	6.65e-08	sp_P97432_NBR1_MOUSE_Next_to_BRCA1_gene_1_protein_OS=Mus_musculus_OX=10090_GN=Nbr1_PE=1_SV=1
Cluster-3.7479	16061.4	-1.61522	6.65e-08	sp_P14854_CX6B1_HUMAN_Cytochrome_c_oxidase_subunit_6B1_OS=Homo_sapiens_OX=9606_GN=COX6B1_PE=1_SV=2
Cluster-4445.1	125.118	1.62019	6.65e-08	sp_B0JZD0_CTL5_XENTR_Choline_transporter-like_protein_5_OS=Xenopus_tropicalis_OX=8364_GN=slc44a5_PE=2_SV=1
Cluster-14447.0	1018.03	-1.76527	6.66e-08	sp_Q5R8B1_DPM3_PONAB_Dolichol-phosphate_mannosyltransferase_subunit_3_OS=Pongo_abelii_OX=9601_GN=DPM3_PE=3_SV=1
Cluster-15045.1	6762.31	-1.94149	6.66e-08	sp_Q00013_EM55_HUMAN_55_kDa_erythrocyte_membrane_protein_OS=Homo_sapiens_OX=9606_GN=MPP1_PE=1_SV=2
Cluster-3.3979	325.209	1.39955	6.68e-08	sp_O75417_DPOLQ_HUMAN_DNA_polymerase_theta_OS=Homo_sapiens_OX=9606_GN=POLQ_PE=1_SV=2
Cluster-3.4456	224.191	1.57679	6.68e-08
Cluster-6583.0	438.407	-1.71935	6.68e-08	sp_Q91560_REXO4_XENLA_RNA_exonuclease_4_OS=Xenopus_laevis_OX=8355_GN=rexo4_PE=2_SV=2
Cluster-3.2850	149.8	1.44139	6.71e-08
Cluster-9991.0	93.1262	-2.94981	6.71e-08	sp_Q504A5_TPMT_DANRE_Probable_thiopurine_S-methyltransferase_OS=Danio_rerio_OX=7955_GN=tpmt_PE=2_SV=1
Cluster-3.9343	9766.06	-1.77756	6.74e-08	sp_P62972_UBIQP_XENLA_Polyubiquitin_(Fragment)_OS=Xenopus_laevis_OX=8355_PE=1_SV=2
Cluster-3.10681	8432.3	-2.25317	6.76e-08	sp_Q2L897_QCR8_AILME_Cytochrome_b-c1_complex_subunit_8_OS=Ailuropoda_melanoleuca_OX=9646_GN=UQCRQ_PE=3_SV=3
Cluster-14435.0	686.386	-1.7917	6.79e-08	sp_P84096_RHOG_MOUSE_Rho-related_GTP-binding_protein_RhoG_OS=Mus_musculus_OX=10090_GN=Rhog_PE=1_SV=1
Cluster-10893.0	72.6349	1.30106	6.83e-08	sp_Q8C172_CERS6_MOUSE_Ceramide_synthase_6_OS=Mus_musculus_OX=10090_GN=Cers6_PE=1_SV=1
Cluster-15762.1	6180.29	-1.97096	6.83e-08	sp_Q3SZ52_UB2V1_BOVIN_Ubiquitin-conjugating_enzyme_E2_variant_1_OS=Bos_taurus_OX=9913_GN=UBE2V1_PE=2_SV=1
Cluster-3.6303	2335.83	-2.25017	6.89e-08	sp_Q6U6G5_ZC3HF_RAT_Zinc_finger_CCCH_domain-containing_protein_15_OS=Rattus_norvegicus_OX=10116_GN=Zc3h15_PE=1_SV=1
Cluster-3.10640	1947.96	-2.16915	6.91e-08	sp_Q5TGZ0_MIC10_HUMAN_MICOS_complex_subunit_MIC10_OS=Homo_sapiens_OX=9606_GN=MINOS1_PE=1_SV=1
Cluster-2009.0	51.3734	-2.41849	6.91e-08	sp_P55160_NCKPL_HUMAN_Nck-associated_protein_1-like_OS=Homo_sapiens_OX=9606_GN=NCKAP1L_PE=1_SV=3
Cluster-3.8838	2770.19	-1.61259	6.92e-08	sp_Q6IR75_CSN2_XENLA_COP9_signalosome_complex_subunit_2_(Fragment)_OS=Xenopus_laevis_OX=8355_GN=csn2_PE=2_SV=1
Cluster-3.7672	3458.51	-1.56357	6.93e-08	sp_P60840_ENSA_MOUSE_Alpha-endosulfine_OS=Mus_musculus_OX=10090_GN=Ensa_PE=1_SV=1
Cluster-3.11131	600.689	-2.34123	6.94e-08	sp_Q9CQX8_RT36_MOUSE_28S_ribosomal_protein_S36,_mitochondrial_OS=Mus_musculus_OX=10090_GN=Mrps36_PE=1_SV=1
Cluster-3.1560	1045.61	1.13924	6.94e-08
Cluster-4184.0	551.605	1.33165	6.97e-08
Cluster-13454.0	367.63	-1.89256	6.98e-08	sp_P14620_ACYP2_ANAPL_Acylphosphatase-2_OS=Anas_platyrhynchos_OX=8839_GN=ACYP2_PE=1_SV=2
Cluster-9998.0	421.34	-2.24506	6.98e-08	sp_Q86XH1_IQCA1_HUMAN_IQ_and_AAA_domain-containing_protein_1_OS=Homo_sapiens_OX=9606_GN=IQCA1_PE=2_SV=1
Cluster-3.13267	525.606	-1.77857	6.98e-08
Cluster-3.12859	297.521	-1.3995	7.04e-08
Cluster-11191.0	72.907	1.66267	7.09e-08	sp_Q9Z1N5_DX39B_MOUSE_Spliceosome_RNA_helicase_Ddx39b_OS=Mus_musculus_OX=10090_GN=Ddx39b_PE=1_SV=1
Cluster-3.1717	2078.01	-1.39883	7.12e-08	sp_Q6P878_EIF3L_XENTR_Eukaryotic_translation_initiation_factor_3_subunit_L_OS=Xenopus_tropicalis_OX=8364_GN=eif3l_PE=2_SV=1
Cluster-13904.1	151.271	-1.29195	7.14e-08	sp_Q02084_A33_PLEWA_Zinc-binding_protein_A33_OS=Pleurodeles_waltl_OX=8319_PE=1_SV=2
Cluster-14473.0	57.1647	-2.48677	7.14e-08	sp_Q64632_ITB4_RAT_Integrin_beta-4_OS=Rattus_norvegicus_OX=10116_GN=Itgb4_PE=1_SV=1
Cluster-4771.0	2529.18	-2.06506	7.14e-08	sp_A4QNF3_ROMO1_XENTR_Reactive_oxygen_species_modulator_1_OS=Xenopus_tropicalis_OX=8364_GN=romo1_PE=3_SV=1
Cluster-12587.0	3738.38	-1.78978	7.19e-08	sp_P49796_RGS3_HUMAN_Regulator_of_G-protein_signaling_3_OS=Homo_sapiens_OX=9606_GN=RGS3_PE=1_SV=2
Cluster-11410.0	356.843	-1.07974	7.23e-08	sp_Q6P9H4_CNKR3_HUMAN_Connector_enhancer_of_kinase_suppressor_of_ras_3_OS=Homo_sapiens_OX=9606_GN=CNKSR3_PE=1_SV=1
Cluster-3.6393	490.265	1.32516	7.24e-08
Cluster-3.11456	9219.48	-1.87783	7.29e-08	sp_O00370_LORF2_HUMAN_LINE-1_retrotransposable_element_ORF2_protein_OS=Homo_sapiens_OX=9606_PE=1_SV=1
Cluster-3.12805	4993.23	-2.05012	7.32e-08	sp_Q9Y2D8_ADIP_HUMAN_Afadin-_and_alpha-actinin-binding_protein_OS=Homo_sapiens_OX=9606_GN=SSX2IP_PE=1_SV=3
Cluster-3.3365	2338.03	-1.59121	7.37e-08	sp_Q91Z38_TTC1_MOUSE_Tetratricopeptide_repeat_protein_1_OS=Mus_musculus_OX=10090_GN=Ttc1_PE=1_SV=1
[truncated: 4,360 more rows]
