# Supplementary material for: Loss of Active Neurogenesis in the Adult Shark Retina
Source: Front Cell Dev Biol. 2021 Feb 11;9:628721. doi: 10.3389/fcell.2021.628721 (PMC7905061; doi:10.3389/fcell.2021.628721)
Supplement: Supplementary Table 1 — Genes belonging to developmental signalling pathways that showed differential expression in the RNA-Seq analyses. [file Table_1.docx]

**Supplementary Table 1**. Genes belonging to developmental signalling pathways that showed differential expression in the RNA-Seq analyses. References linking these signalling pathways to retinal development are indicated in the third column.

| **PATHWAY** | **GENES** | **REFERENCES** |
| --- | --- | --- |
| **Shh pathway** | GLI2  (Zinc finger protein GLI2) | Wall et al., 2009; Sanek et al., 2009; Todd and Fischer, 2015; Gallardo and Bovolenta, 2018 |
| HHIP  (Hedgehog-interacting protein) |
| HES1B  (Transcription factor HES1B) |
| ZIC2  (Zinc finger protein 2) |
| **Wnt pathway** | WNT10A  (protein Wnt10a) | Hunter et al., 2004; Poggi et al., 2018 |
| WIF1  (Wnt inhibitory factor 1) |
| DKK3  (Dickkopf-related protein 3) |
| GBP  (GSK3-binding protein) |
| **Notch pathway** | NOTCH1  (Neurogenic locus notch  homolog protein 1) | Lindsell et al., 1996; Nelson et al., 2009; Maurer et al., 2014; Riesenberg and Brown, 2016; Ivanov, 2019 |
| DLK1  (Protein delta homolog 1) |
| MAML2  (Mastermind-like protein 2) |
| JAG2  (Jagged-2) |
| HES1B  (Transcription factor HES 1B) |
| **Slit-Robo pathway** | ROBO1  (Roundabout homolog 1) | Erskine et al., 2000; Huang et al., 2009b, Xue and Harris, 2011 |
| ROBO2  (Roundabout homolog 2) |
| SLIT3  (Slit homolog 3 protein |
| SRGP2  (SLIT-ROBO Rho GTPase-activating protein 2) |
| SRGP3  (SLIT-ROBO Rho GTPase-activating protein 3) |
| MYCN  (N-myc proto-oncogene protein) |
| MYBP  (C-myc binding protein) |
| NMI  (N-myc interactor) |
